# Supplementary material
Source: PubMed Central journal article supplement (PMC3164861)
Supplement: NIHMS287381-supplement-02.pdf [file NIHMS287381-supplement-02.pdf]

**Table S1: Zebrafish transcripts recognized by Affymetrix probe sets that are differentially expressed in CONVD compared to GF zebrafish larvae at 6dpf**

| Probe set ID       | Gene name <sup>a</sup>                                                                           | Gene symbol <sup>a</sup> | ZFIN ID <sup>a</sup> | Ensembl ID <sup>a</sup> | Fold-difference <sup>b</sup> | SAM <sup>c</sup> | Mean intensity <sup>d</sup> | GI enrichment <sup>e</sup> | GI development <sup>f</sup> | Compugen probe ID <sup>g</sup>                                                                                              |
|--------------------|--------------------------------------------------------------------------------------------------|--------------------------|----------------------|-------------------------|------------------------------|------------------|-----------------------------|----------------------------|-----------------------------|-----------------------------------------------------------------------------------------------------------------------------|
| Dr.18756.1.S1_at   | hypothetical protein, weakly similar to XP_00163884.1 predicted protein (Nematostella vectensis) | --                       | --                   | --                      | 24.19                        | +                | 639.06                      | GI                         | late                        | --                                                                                                                          |
| Dr.8591.1.A1_at    | similar to hemopexin (HPX)                                                                       | zgc:152945               | ZDB-GENE-060929-800  | ENSDARG00000051912      | 9.04                         | +                | 142.06                      | GI                         | late                        | --                                                                                                                          |
| Dr.13131.1.S1_at   | serum amyloid A                                                                                  | saa                      | ZDB-GENE-040927-15   | ENSDARG00000045999      | 8.96                         | +                | 113.88                      | --                         | --                          | CGENXEB_456005085_0                                                                                                         |
| Dr.9478.3.S1_a_at  | myeloperoxidase (myeloid-specific peroxidase)                                                    | mpo                      | ZDB-GENE-030131-9460 | ENSDARG00000019521      | 8.01                         | +                | 71.70                       | --                         | --                          | CGENXEB_456000173_0                                                                                                         |
| Dr.967.1.S1_at     | matrix metalloproteinase 9                                                                       | mmp9                     | ZDB-GENE-040426-2132 | ENSDARG00000042816      | 7.17                         | --               | 305.77                      | non-GI                     | --                          | CGENXEB_456008310_0                                                                                                         |
| Dr.18835.2.S1_at   | similar to microfibrillar-associated protein 4 (MFAP4)                                           | zgc:171687               | ZDB-GENE-071004-9    | ENSDARG00000038682      | 6.41                         | +                | 113.98                      | --                         | --                          | CGENXEB_456015134_0                                                                                                         |
| Dr.3585.1.S1_at    | angiotensinogen                                                                                  | agt                      | ZDB-GENE-030131-1205 | ENSDARG00000016412      | 5.97                         | +                | 100.11                      | GI                         | late                        | --                                                                                                                          |
| Dr.4863.1.A1_at    | similar to apical early endosomal glycoprotein (novel MAM domain containing protein)             | wu:fb63a08               | ZDB-GENE-030131-1216 | ENSDARG00000020994      | 5.97                         | +                | 319.20                      | GI                         | late                        | CGENXEB_456003284_0                                                                                                         |
| Dr.21005.1.S1_s_at | complement component C3b /// complement component C3c                                            | c3b /// c3c              | ZDB-GENE-990415-37   | ENSDARG00000052207      | 5.88                         | +                | 269.81                      | GI                         | late                        | CGENXEB_456000236_0 ///<br>CGENXEB_456000237_0 ///<br>CGENXEB_456015311_0<br>CGENXEB_456000235_0 ///<br>CGENXEB_456012358_0 |
| Dr.7722.1.A1_at    | complement component C3a                                                                         | c3a                      | ZDB-GENE-030131-9749 | ENSDARG00000012694      | 5.53                         | +                | 438.71                      | GI                         | late                        | CGENXEB_456000235_0 ///<br>CGENXEB_456012358_0                                                                              |
| Dr.190.1.S1_at     | complement factor B                                                                              | cfb                      | ZDB-GENE-980526-487  | ENSDARG00000055278      | 5.06                         | +                | 211.71                      | GI                         | late                        | CGENXEB_456000406_0                                                                                                         |
| Dr.10314.1.S1_a_at | matrix metalloproteinase 13                                                                      | mmp13                    | ZDB-GENE-031202-2    | ENSDARG00000012395      | 5.05                         | +                | 304.60                      | non-GI                     | --                          | CGENXEB_456003294_0                                                                                                         |
| Dr.4863.2.S1_at    | similar to apical early endosomal glycoprotein (novel MAM domain containing protein)             | wu:fb63a08               | ZDB-GENE-030131-1216 | ENSDARG00000020994      | 4.92                         | +                | 525.46                      | --                         | --                          | --                                                                                                                          |
| Dr.12491.1.A1_at   | complement C4                                                                                    | c4                       | --                   | ENSDARG00000038424      | 4.90                         | +                | 162.15                      | GI                         | --                          | CGENXEB_456008645_0                                                                                                         |
| Dr.15281.1.A1_at   | tissue inhibitor of metalloproteinase 2b                                                         | timp2b                   | ZDB-GENE-040426-2655 | ENSDARG00000075261      | 4.89                         | --               | 85.38                       | --                         | --                          | CGENXEB_456014703_0                                                                                                         |
| Dr.25195.1.S1_at   | similar to putative galactose-binding protein                                                    | LOC561528                | --                   | ENSDARG00000068465      | 4.80                         | +                | 37.98                       | --                         | --                          | CGENXEB_456007984_0                                                                                                         |
| Dr.23731.1.A1_at   | similar to complement component C3                                                               | zgc:103710               | ZDB-GENE-041212-2    | ENSDARG000000043719     | 4.33                         | +                | 121.27                      | GI                         | late                        | --                                                                                                                          |
| Dr.17591.1.S1_at   | similar to complement component 1, q subcomponent-like 4                                         | LOC100149559             | --                   | --                      | 4.19                         | --               | 168.81                      | GI                         | late                        | --                                                                                                                          |
| Dr.20291.1.A1_at   | complement component C3b /// complement component C3c                                            | c3b /// c3c              | ZDB-GENE-990415-37   | ENSDARG00000052207      | 4.09                         | +                | 399.86                      | GI                         | late                        | CGENXEB_456000236_0 ///<br>CGENXEB_456000237_0 ///<br>CGENXEB_456015311_0<br>CGENXEB_456010175_0<br>CGENXEB_456011892_0     |
| Dr.6431.1.S1_at    | suppressor of cytokine signaling 3a                                                              | socs3a                   | ZDB-GENE-030131-7349 | ENSDARG00000025428      | 3.66                         | +                | 342.76                      | non-GI                     | --                          | --                                                                                                                          |
| Dr.4937.1.A1_at    | similar to Deleted in malignant brain tumors 1 protein precursor (CRP-ductin)                    | wu:fb66a12               | --                   | --                      | 3.50                         | +                | 116.46                      | --                         | late                        | CGENXEB_456010175_0<br>CGENXEB_456011892_0                                                                                  |
| Dr.22145.1.A1_at   | complement factor B                                                                              | cfb                      | ZDB-GENE-980526-487  | ENSDARG00000055278      | 3.48                         | +                | 131.85                      | GI                         | late                        | CGENXEB_456000406_0                                                                                                         |
| Dr.8000.1.S1_at    | glutathione peroxidase 1b                                                                        | gpx1b                    | ZDB-GENE-040912-60   | ENSDARG00000006207      | 3.29                         | --               | 450.20                      | GI                         | --                          | CGENXEB_456009641_0                                                                                                         |
| Dr.13972.1.S1_at   | similar to DNA-damage-inducible transcript 4 (DDIT4)                                             | zgc:64114                | ZDB-GENE-031002-35   | ENSDARG00000037618      | 3.25                         | +                | 71.28                       | --                         | --                          | --                                                                                                                          |
| Dr.4676.1.A1_at    | unknown                                                                                          | --                       | --                   | --                      | 3.14                         | +                | 28.65                       | GI                         | --                          | --                                                                                                                          |
| Dr.6845.1.S1_at    | complement component C3a                                                                         | c3a                      | ZDB-GENE-030131-9749 | ENSDARG00000012694      | 3.12                         | +                | 25.25                       | GI                         | late                        | CGENXEB_456000235_0 ///<br>CGENXEB_456012358_0<br>CGENXEB_456004336_0                                                       |
| Dr.2452.2.A1_a_at  | complement component 9                                                                           | c9                       | ZDB-GENE-050522-442  | ENSDARG00000016319      | 3.11                         | +                | 96.03                       | GI                         | late                        | CGENXEB_456004336_0                                                                                                         |
| Dr.22217.1.A1_at   | similar to complement factor H-related 1                                                         | --                       | --                   | --                      | 3.09                         | +                | 122.30                      | GI                         | late                        | --                                                                                                                          |
| Dr.18429.1.A1_at   | coagulation factor V                                                                             | f5                       | ZDB-GENE-030131-5531 | ENSDARG00000055705      | 3.04                         | +                | 231.17                      | GI                         | late                        | --                                                                                                                          |
| Dr.2973.1.A1_at    | neutrophil cytosolic factor 1                                                                    | ncf1                     | ZDB-GENE-031006-6    | ENSDARG00000033735      | 2.99                         | +                | 43.12                       | --                         | --                          | CGENXEB_456008385_0                                                                                                         |
| Dr.2452.2.A1_x_at  | complement component 9                                                                           | c9                       | ZDB-GENE-050522-442  | ENSDARG00000016319      | 2.93                         | +                | 198.53                      | GI                         | late                        | CGENXEB_456004336_0                                                                                                         |
| Dr.17470.1.S1_at   | nephrosin                                                                                        | npsn                     | ZDB-GENE-040420-2    | ENSDARG00000010423      | 2.87                         | +                | 170.03                      | non-GI                     | late                        | --                                                                                                                          |
| Dr.10376.1.S1_at   | similar to cornifelin                                                                            | --                       | --                   | --                      | 2.87                         | +                | 139.57                      | non-GI                     | --                          | --                                                                                                                          |
| Dr.8090.1.A1_at    | N-myc downstream regulated gene 1, like                                                          | ndrg1l                   | ZDB-GENE-040426-1648 | ENSDARG00000010420      | 2.86                         | +                | 188.63                      | non-GI                     | --                          | --                                                                                                                          |
| Dr.2452.1.A1_at    | complement component 9                                                                           | c9                       | ZDB-GENE-050522-442  | ENSDARG00000016319      | 2.86                         | +                | 463.16                      | GI                         | late                        | CGENXEB_456004336_0                                                                                                         |
| Dr.10624.1.S1_at   | similar to peroxiredoxin 1                                                                       | zgc:110343               | ZDB-GENE-050320-35   | --                      | 2.85                         | --               | 193.79                      | GI                         | late                        | --                                                                                                                          |
| Dr.9457.1.A1_at    | egl nine homolog 3 (C. elegans)                                                                  | egl n3                   | ZDB-GENE-040426-2541 | ENSDARG00000032553      | 2.85                         | +                | 35.20                       | GI                         | --                          | --                                                                                                                          |
| Dr.5461.1.A1_at    | similar to cytochrome c oxidase subunit IV isoform 2 (COX4L1)                                    | Q6PBK2_DANRE             | --                   | ENSDARG00000012388      | 2.85                         | +                | 104.87                      | GI                         | --                          | CGENXEB_456006757_0                                                                                                         |
| Dr.19799.1.A1_at   | lipin 1                                                                                          | lpin1                    | --                   | ENSDARG00000020239      | 2.63                         | --               | 1096.44                     | GI                         | late                        | CGENXEB_456015908_0                                                                                                         |
| Dr.1889.2.A1_a_at  | transferin a                                                                                     | tfa                      | ZDB-GENE-980526-35   | ENSDARG00000016771      | 2.60                         | +                | 3166.85                     | GI                         | --                          | --                                                                                                                          |
| Dr.5462.1.S1_at    | fibrinogen, B beta polypeptide                                                                   | fgb                      | ZDB-GENE-030131-9261 | ENSDARG00000008969      | 2.60                         | +                | 343.58                      | GI                         | late                        | --                                                                                                                          |
| Dr.7368.1.A1_at    | nuclear factor of kappa light polypeptide gene enhancer in B-cells inhibitor, alpha a            | ikbaa                    | ZDB-GENE-040426-2227 | ENSDARG00000005481      | 2.54                         | +                | 215.48                      | non-GI                     | --                          | --                                                                                                                          |
| Dr.12770.1.S1_at   | unknown                                                                                          | --                       | --                   | --                      | 2.50                         | +                | 78.34                       | non-GI                     | --                          | --                                                                                                                          |
| Dr.12725.1.A1_at   | similar to six transmembrane prostate protein 4 (STEAP4)                                         | zgc:112143               | ZDB-GENE-050417-240  | ENSDARG00000055901      | 2.50                         | --               | 134.26                      | GI                         | late                        | --                                                                                                                          |
| Dr.22129.1.A1_at   | si:ch1073-126c3.2                                                                                | si:ch1073-126c3.2        | --                   | ENSDARG00000077600      | 2.48                         | --               | 17.57                       | GI                         | late                        | --                                                                                                                          |
| Dr.15942.1.S1_at   | novel protein similar to vertebrate transmembrane 4 L six family member 5 (TM4SF5)               | CH211-137I24.10          | --                   | ENSDARG00000057706      | 2.41                         | +                | 280.77                      | GI                         | --                          | --                                                                                                                          |
| Dr.1280.1.A1_at    | CCAAT/enhancer binding protein (C/EBP), delta                                                    | cebpd                    | ZDB-GENE-020111-4    | --                      | 2.40                         | +                | 768.22                      | GI                         | late                        | --                                                                                                                          |

|                   |                                                                                                                                                                                  |                   |                      |                    |      |    |         |        |       |                                                                       |
|-------------------|----------------------------------------------------------------------------------------------------------------------------------------------------------------------------------|-------------------|----------------------|--------------------|------|----|---------|--------|-------|-----------------------------------------------------------------------|
| Dr.16392.1.A1 at  | complement component 6                                                                                                                                                           | c6                | ZDB-GENE-040426-1358 | ENSDARG00000057113 | 2.36 | -- | 62.12   | --     | --    | --                                                                    |
| Dr.23512.1.A1 at  | unknown                                                                                                                                                                          | wu:fb05h10        | --                   | --                 | 2.33 | -- | 45.26   | --     | --    | --                                                                    |
| Dr.3444.2.S1 at   | similar to lysozyme G                                                                                                                                                            | zgc:162941        | ZDB-GENE-030131-8517 | ENSDARG00000071701 | 2.33 | +  | 40.70   | --     | --    | --                                                                    |
| Dr.2655.1.S1 at   | proteoglycan 4                                                                                                                                                                   | prg4              | ZDB-GENE-041014-324  | ENSDARG00000028163 | 2.32 | -- | 73.69   | GI     | late  | --                                                                    |
| Dr.20270.1.S1 at  | novel pentraxin-related gene                                                                                                                                                     | si:ch211-234p6.12 | ZDB-GENE-060503-220  | ENSDARG00000042613 | 2.31 | -- | 511.86  | GI     | late  | CGENXEB_456015990_0                                                   |
| Dr.8723.1.S1 at   | novel thioredoxin domain-containing protein                                                                                                                                      | zgc:92903         | ZDB-GENE-040718-162  | ENSDARG00000044125 | 2.29 | -- | 235.22  | GI     | late  | --                                                                    |
| Dr.20030.1.S1 at  | melanocortin 4 receptor                                                                                                                                                          | mc4r              | ZDB-GENE-021223-2    | ENSDARG00000015515 | 2.29 | -- | 28.19   | --     | late  | --                                                                    |
| Dr.17437.1.S1 at  | similar to C1q-like protein                                                                                                                                                      | zgc:136272        | ZDB-GENE-040724-112  | ENSDARG00000023157 | 2.25 | +  | 44.59   | GI     | late  | --                                                                    |
| Dr.5356.1.A1 at   | similar to platelet receptor GI24                                                                                                                                                | zgc:153073        | ZDB-GENE-060929-716  | ENSDARG00000068784 | 2.24 | +  | 54.00   | non-GI | --    | --                                                                    |
| Dr.845.1.A1 at    | fibrinogen alpha chain                                                                                                                                                           | fga               | ZDB-GENE-031010-21   | ENSDARG00000020741 | 2.23 | +  | 506.69  | GI     | --    | --                                                                    |
| Dr.1280.1.A2 at   | CCAAT/enhancer binding protein (C/EBP), delta                                                                                                                                    | cebpd             | ZDB-GENE-020111-4    | --                 | 2.20 | -- | 23.47   | --     | --    | --                                                                    |
| Dr.8109.1.S1 at   | lymphocyte cytosolic plastin 1                                                                                                                                                   | lcp1              | ZDB-GENE-991213-5    | ENSDARG00000023188 | 2.17 | +  | 127.97  | --     | --    | --                                                                    |
| Dr.9478.1.S1_at   | cytochrome P450, family 1, subfamily A                                                                                                                                           | cyp1a             | ZDB-GENE-011219-1    | ENSDARG00000026039 | 2.15 | -- | 743.29  | GI     | late  | CGENXEB_456000434_0 ///<br>CGENXEB_456011738_0<br>CGENXEB_456004003_0 |
| Dr.9617.1.A1 at   | suppressor of cytokine signaling 3b                                                                                                                                              | socs3b            | ZDB-GENE-040426-2528 | ENSDARG00000026611 | 2.09 | -- | 183.74  | --     | late  | --                                                                    |
| Dr.827.1.A1_at    | NADH dehydrogenase (ubiquinone) 1 alpha subcomplex, 4                                                                                                                            | ndufa4            | ZDB-GENE-040426-1962 | ENSDARG00000056108 | 2.08 | +  | 96.04   | GI     | late  | --                                                                    |
| DrAffx.1.32.S1 at | transforming growth factor, beta 1                                                                                                                                               | tgfb1             | ZDB-GENE-030618-1    | ENSDARG00000041502 | 2.08 | -- | 34.11   | --     | late  | --                                                                    |
| Dr.6575.1.S1 at   | CCAAT/enhancer binding protein (C/EBP), beta                                                                                                                                     | cebpb             | ZDB-GENE-020111-3    | ENSDARG00000042725 | 2.06 | -- | 471.78  | --     | late  | --                                                                    |
| Dr.20821.1.A1 at  | plasminogen                                                                                                                                                                      | plg               | ZDB-GENE-030131-1411 | ENSDARG00000023111 | 2.06 | -- | 319.30  | GI     | --    | --                                                                    |
| Dr.17761.1.S1 at  | similar to Thrombospondin 1                                                                                                                                                      | LOC100151346      | --                   | --                 | 2.06 | -- | 66.70   | GI     | --    | --                                                                    |
| Dr.20185.1.S1 at  | lipoprotein lipase                                                                                                                                                               | lpl               | ZDB-GENE-990415-139  | ENSDARG00000071472 | 2.04 | +  | 292.56  | GI     | --    | --                                                                    |
| Dr.12399.1.S1_at  | macrophage stimulating 1 (hepatocyte growth factor-like)                                                                                                                         | mst1              | ZDB-GENE-020806-3    | ENSDARG00000031855 | 2.04 | +  | 68.88   | GI     | --    | --                                                                    |
| Dr.4907.1.S1 at   | fibrinogen, gamma polypeptide                                                                                                                                                    | fgg               | ZDB-GENE-040426-1998 | ENSDARG00000037281 | 2.02 | +  | 1073.75 | GI     | --    | --                                                                    |
| Dr.14963.1.A1_at  | similar to immune-related lectin-like receptor 4 (il1r4)                                                                                                                         | si:ch211-154o6.6  | ZDB-GENE-060503-576  | ENSDARG00000056379 | 2.00 | +  | 140.85  | GI     | late  | --                                                                    |
| Dr.2999.1.S1_at   | serglycin (secretory granule proteoglycan core peptide)                                                                                                                          | B8A5H9_DANRE      | --                   | ENSDARG00000077069 | 1.99 | -- | 65.43   | non-GI | --    | --                                                                    |
| Dr.7365.1.A1_at   | ATP-binding cassette, sub-family A (ABC1), member 1A                                                                                                                             | abca1a            | ZDB-GENE-031006-12   | ENSDARG00000074635 | 1.99 | +  | 622.55  | GI     | late  | --                                                                    |
| Dr.3645.1.S1 at   | plasminogen                                                                                                                                                                      | plg               | ZDB-GENE-030131-1411 | ENSDARG00000023111 | 1.98 | -- | 577.06  | GI     | late  | --                                                                    |
| Dr.22133.1.S1 at  | unknown                                                                                                                                                                          | --                | --                   | --                 | 1.97 | -- | 33.42   | GI     | --    | --                                                                    |
| Dr.19902.1.S1 at  | cathepsin L1, a                                                                                                                                                                  | ctsl1a            | ZDB-GENE-030131-106  | ENSDARG0000007836  | 1.96 | +  | 1644.33 | GI     | late  | CGENXEB_456012788_0                                                   |
| Dr.10250.1.A1 at  | L-threonine dehydrogenase                                                                                                                                                        | tdh               | ZDB-GENE-040426-2379 | ENSDARG00000002745 | 1.96 | +  | 1736.29 | non-GI | late  | --                                                                    |
| Dr.9515.1.A1 at   | coronin, actin binding protein, 1A                                                                                                                                               | coro1a            | ZDB-GENE-030131-9512 | ENSDARG00000054610 | 1.96 | +  | 68.14   | non-GI | --    | --                                                                    |
| Dr.16095.1.S1 at  | insulin-like growth factor binding protein 1b                                                                                                                                    | igfbp1b           | ZDB-GENE-081210-3    | ENSDARG00000038666 | 1.93 | +  | 839.42  | GI     | late  | --                                                                    |
| Dr.25219.1.A1 at  | novel serine protease                                                                                                                                                            | zgc:153968        | ZDB-GENE-061027-211  | ENSDARG00000061858 | 1.92 | +  | 380.02  | GI     | late  | --                                                                    |
| Dr.17438.1.S1 at  | similar to TRAF2 binding protein (TIFA)                                                                                                                                          | LOC560548         | --                   | ENSDARG00000022134 | 1.92 | -- | 295.40  | --     | --    | --                                                                    |
| Dr.18834.1.S1 at  | urate oxidase                                                                                                                                                                    | uox               | ZDB-GENE-040718-17   | ENSDARG0000007024  | 1.91 | -- | 591.96  | GI     | late  | --                                                                    |
| Dr.26268.1.A1_at  | similar to Macrophage receptor with collagenous structure (Scavenger receptor class A member 2)                                                                                  | LOC571584         | --                   | ENSDARG00000059294 | 1.91 | -- | 76.06   | --     | --    | --                                                                    |
| Dr.24507.1.S1_at  | nuclear factor of kappa light polypeptide gene enhancer in B-cells inhibitor, alpha b                                                                                            | ikbab             | ZDB-GENE-030131-1819 | ENSDARG0000007693  | 1.91 | -- | 294.00  | non-GI | --    | --                                                                    |
| Dr.4103.1.A1_at   | novel protein similar to vertebrate complement component (3d/Epstein Barr virus) receptor 2 (CR2)                                                                                | A8E7E1_DANRE      | --                   | ENSDARG00000075761 | 1.91 | +  | 660.21  | GI     | late  | --                                                                    |
| Dr.8587.1.A1 at   | insulin-like growth factor binding protein 1a                                                                                                                                    | igfbp1a           | ZDB-GENE-021231-1    | ENSDARG00000014947 | 1.90 | -- | 653.43  | GI     | late  | CGENXEB_456000336_0                                                   |
| Dr.11290.1.A1 at  | midnolin                                                                                                                                                                         | midn              | ZDB-GENE-030131-2433 | ENSDARG00000018524 | 1.86 | -- | 609.63  | non-GI | early | --                                                                    |
| Dr.8587.1.A2 at   | insulin-like growth factor binding protein 1a                                                                                                                                    | igfbp1a           | ZDB-GENE-021231-1    | ENSDARG00000014947 | 1.86 | +  | 1156.50 | GI     | late  | CGENXEB_456000336_0                                                   |
| Dr.26483.1.S1 at  | ERO1-like (S. cerevisiae)                                                                                                                                                        | ero1l             | ZDB-GENE-040426-1312 | ENSDARG00000015228 | 1.85 | +  | 34.36   | --     | --    | --                                                                    |
| DrAffx.2.58.A1_at | cytochrome P450, family 24, subfamily A, polypeptide 1, like                                                                                                                     | cyp24a1l          | ZDB-GENE-060825-1    | ENSDARG00000070420 | 1.83 | +  | 184.99  | GI     | late  | --                                                                    |
| Dr.14944.1.A1_at  | similar to Mitogen-activated protein kinase kinase 5 (MAPK/ERK kinase kinase 5) (MEK kinase 5) (MEKK 5) (Apoptosis signal-regulating kinase 1) (ASK-1)                           | LOC555662         | --                   | --                 | 1.82 | -- | 79.99   | --     | --    | --                                                                    |
| Dr.25449.1.A1 at  | similar to ATP-dependent DNA helicase Q5                                                                                                                                         | LOC100150325      | --                   | ENSDARG00000059556 | 1.82 | +  | 41.35   | --     | --    | --                                                                    |
| Dr.5573.1.S1 at   | ADP-ribosylation factor-like 11                                                                                                                                                  | arl11             | ZDB-GENE-030131-3410 | ENSDARG00000036637 | 1.82 | +  | 25.58   | GI     | late  | --                                                                    |
| Dr.20479.1.S1 at  | similar to Uncharacterized protein C16orf7                                                                                                                                       | zgc:113159        | ZDB-GENE-050306-57   | ENSDARG00000019195 | 1.81 | -- | 16.89   | --     | --    | --                                                                    |
| Dr.1889.1.S1 at   | transferrin a                                                                                                                                                                    | tfa               | ZDB-GENE-980526-35   | ENSDARG00000016771 | 1.78 | -- | 2671.34 | GI     | --    | --                                                                    |
| Dr.4654.2.S1_at   | similar to Protein phosphatase 1 regulatory subunit 15A (Growth arrest and DNA damage-inducible protein GADD34)(Myeloid differentiation primary response protein MyD116 homolog) | zgc:162126        | ZDB-GENE-030131-4408 | ENSDARG00000069135 | 1.77 | -- | 281.38  | --     | --    | --                                                                    |
| Dr.15004.1.A1 at  | unknown                                                                                                                                                                          | --                | --                   | --                 | 1.77 | +  | 11.31   | --     | --    | --                                                                    |
| Dr.25944.1.A1 at  | unknown                                                                                                                                                                          | --                | --                   | --                 | 1.77 | +  | 48.59   | GI     | late  | --                                                                    |

|                                                                                                                                                                                                                 |                                                                                                                                                                                                                                                                                                                                                                                                                      |                                                                                                                           |                                                                                                                                                                                                                                      |                                                                                                                                                                                                                |                                                                                      |                                                            |                                                                                                           |                                                                        |                                                                              |                                                                |
|-----------------------------------------------------------------------------------------------------------------------------------------------------------------------------------------------------------------|----------------------------------------------------------------------------------------------------------------------------------------------------------------------------------------------------------------------------------------------------------------------------------------------------------------------------------------------------------------------------------------------------------------------|---------------------------------------------------------------------------------------------------------------------------|--------------------------------------------------------------------------------------------------------------------------------------------------------------------------------------------------------------------------------------|----------------------------------------------------------------------------------------------------------------------------------------------------------------------------------------------------------------|--------------------------------------------------------------------------------------|------------------------------------------------------------|-----------------------------------------------------------------------------------------------------------|------------------------------------------------------------------------|------------------------------------------------------------------------------|----------------------------------------------------------------|
| Dr.4748.1.S1_at                                                                                                                                                                                                 | granulin 2 /// similar to granulin                                                                                                                                                                                                                                                                                                                                                                                   | grn2 /// zgc:136318                                                                                                       | ZDB-GENE-050522-264 ///<br>ZDB-GENE-060512-171                                                                                                                                                                                       | ENSDARG00000035817<br>///<br>ENSDARG00000035818                                                                                                                                                                | 1.77                                                                                 | +                                                          | 273.75                                                                                                    | GI                                                                     | late                                                                         | --                                                             |
| Dr.14415.1.A1_at<br>Dr.25155.1.S1_s_at                                                                                                                                                                          | LMBR1 domain containing 2a<br>ba2 globin                                                                                                                                                                                                                                                                                                                                                                             | lmbird2a<br>ba2                                                                                                           | ZDB-GENE-050417-32<br>ZDB-GENE-990415-19                                                                                                                                                                                             | ENSDARG00000034710<br>ENSDARG00000077603<br>///<br>ENSDARG00000078255                                                                                                                                          | 1.76<br>1.75                                                                         | +                                                          | 33.55<br>27.84                                                                                            | --<br>--                                                               | --<br>late                                                                   | --<br>--                                                       |
| Dr.148.1.A1_at<br>Dr.4868.1.A1_at<br>Dr.1605.1.S1_at                                                                                                                                                            | wu:fa03e10<br>hypothetical protein LOC558116<br>serine proteinase inhibitor, clade A, member 1 ///<br>serine proteinase inhibitor, clade A, member 1, like                                                                                                                                                                                                                                                           | wu:fa03e10<br>zgc:174888<br>serpina1 ///<br>serpina1l                                                                     | --<br>ZDB-GENE-030328-33<br>ZDB-GENE-030131-1421 ///<br>ZDB-GENE-040721-3                                                                                                                                                            | --<br>ENSDARG00000077176<br>ENSDARG00000078556<br>///<br>ENSDARG00000079619                                                                                                                                    | 1.74<br>1.70<br>1.70                                                                 | +                                                          | 534.32<br>173.50<br>2243.65                                                                               | non-GI<br>non-GI<br>GI                                                 | --<br>--<br>late                                                             | --<br>--<br>--                                                 |
| Dr.4654.1.A1_at                                                                                                                                                                                                 | similar to Protein phosphatase 1 regulatory subunit 15A (Growth arrest and DNA damage-inducible protein GADD34)(Myeloid differentiation primary response protein MyD116 homolog)                                                                                                                                                                                                                                     | zgc:162126                                                                                                                | ZDB-GENE-030131-4408                                                                                                                                                                                                                 | ENSDARG00000069135                                                                                                                                                                                             | 1.69                                                                                 | +                                                          | 226.30                                                                                                    | non-GI                                                                 | early                                                                        | --                                                             |
| Dr.19560.1.S1_at<br>Dr.4957.1.S1_at<br>Dr.360.1.A1_at<br>Dr.2829.1.A1_at<br>Dr.24483.1.S1_at<br>Dr.12369.1.A1_at                                                                                                | insulin induced gene 1<br>myeloid cell leukemia sequence 1a<br>phospholipase A2, group XV<br>unknown<br>unknown<br>sulfotransferase family 2, cytosolic sulfotransferase 1                                                                                                                                                                                                                                           | insig1<br>mcl1a<br>pla2g15<br>--<br>--<br>sult2st1                                                                        | ZDB-GENE-030131-6121<br>ZDB-GENE-000511-7<br>ZDB-GENE-030131-6948<br>--<br>--<br>ZDB-GENE-061117-5                                                                                                                                   | ENSDARG00000010658<br>ENSDARG00000009779<br>--<br>--<br>--<br>ENSDARG00000033170                                                                                                                               | 1.69<br>1.69<br>1.69<br>1.68<br>1.68<br>1.67                                         | +                                                          | 120.79<br>1297.48<br>277.71<br>12.11<br>1014.18<br>117.74                                                 | GI<br>--<br>GI<br>--<br>--<br>non-GI                                   | --<br>--<br>late<br>--<br>late<br>--                                         | --<br>--<br>--<br>--<br>--<br>--                               |
| Dr.24729.1.S1_x_at<br>Dr.956.1.S1_at<br>Dr.737.1.A1_at<br>Dr.10728.1.S1_at<br>Dr.10713.1.S1_at                                                                                                                  | unknown<br>cytochrome c oxidase subunit VIb-like<br>jun B proto-oncogene, like<br>glucagon a<br>ATPase, Na+/K+ transporting, alpha 1a.3 polypeptide                                                                                                                                                                                                                                                                  | --<br>zgc:92631<br>junbl<br>qcga<br>atp1a1a.3                                                                             | --<br>ZDB-GENE-040718-448<br>ZDB-GENE-040426-2666<br>ZDB-GENE-010219-1<br>ZDB-GENE-001212-3                                                                                                                                          | --<br>ENSDARG00000045230<br>--<br>ENSDARG00000042999<br>ENSDARG00000039131                                                                                                                                     | 1.67<br>1.66<br>1.65<br>1.65<br>1.65                                                 | --<br>+<br>--<br>+<br>+                                    | 1290.50<br>483.51<br>242.46<br>88.62<br>184.80                                                            | --<br>GI<br>non-GI<br>non-GI<br>non-GI                                 | --<br>--<br>early<br>early<br>--                                             | --<br>--<br>CGENXEB 456000240 0<br>--                          |
| Dr.17570.2.A1_at                                                                                                                                                                                                | MAP kinase-interacting serine/threonine kinase 2b                                                                                                                                                                                                                                                                                                                                                                    | mknk2b                                                                                                                    | ZDB-GENE-030829-2                                                                                                                                                                                                                    | ENSDARG00000015164                                                                                                                                                                                             | 1.64                                                                                 | +                                                          | 2475.97                                                                                                   | --                                                                     | late                                                                         | CGENXEB_456015226_0 ///<br>CGENXEB 456005195 0                 |
| Dr.25214.1.A1_at                                                                                                                                                                                                | cytochrome P450, family 24, subfamily A, polypeptide 1, like                                                                                                                                                                                                                                                                                                                                                         | cyp24a11                                                                                                                  | ZDB-GENE-060825-1                                                                                                                                                                                                                    | ENSDARG00000070420                                                                                                                                                                                             | 1.64                                                                                 | --                                                         | 270.41                                                                                                    | GI                                                                     | late                                                                         | --                                                             |
| Dr.17459.1.S1_a_at<br>Dr.4654.2.S1_a_at                                                                                                                                                                         | inter-alpha (globulin) inhibitor H4 (itih4)<br>similar to Protein phosphatase 1 regulatory subunit 15A (Growth arrest and DNA damage-inducible protein GADD34)(Myeloid differentiation primary response protein MyD116 homolog)                                                                                                                                                                                      | zgc:112265<br>zgc:162126                                                                                                  | ZDB-GENE-050626-133<br>ZDB-GENE-030131-4408                                                                                                                                                                                          | ENSDARG00000036573<br>ENSDARG00000069135                                                                                                                                                                       | 1.62<br>1.62                                                                         | +                                                          | 733.99<br>64.63                                                                                           | GI<br>--                                                               | late<br>--                                                                   | --<br>--                                                       |
| Dr.25727.1.A1_at<br>Dr.1368.4.A1_at<br>Dr.1659.1.A1_at<br>Dr.6604.2.A1_a_at                                                                                                                                     | mitogen-activated protein kinase 14b<br>unknown<br>wu:fc02a12<br>similar to Protein phosphatase 1 regulatory subunit 3C (Protein phosphatase 1 regulatory subunit 5)(Protein targeting to glycogen)                                                                                                                                                                                                                  | mapk14b<br>--<br>wu:fc02a12<br>zgc:77112                                                                                  | ZDB-GENE-021007-1<br>--<br>--<br>ZDB-GENE-040426-2219                                                                                                                                                                                | ENSDARG00000028721<br>--<br>--<br>ENSDARG00000015657                                                                                                                                                           | 1.62<br>1.62<br>1.62<br>1.61                                                         | +                                                          | 49.41<br>2269.42<br>590.37<br>36.14                                                                       | --<br>non-GI<br>--<br>non-GI                                           | --<br>late<br>late<br>--                                                     | --<br>--<br>--<br>--                                           |
| Dr.1082.1.S1_at<br>Dr.26478.1.S1_at                                                                                                                                                                             | prostaglandin-endoperoxide synthase 2a<br>similar to cAMP-dependent protein kinase catalytic subunit beta                                                                                                                                                                                                                                                                                                            | ptgs2a<br>zgc:64054                                                                                                       | ZDB-GENE-020530-2<br>ZDB-GENE-040426-1351                                                                                                                                                                                            | ENSDARG00000004539<br>ENSDARG00000001782                                                                                                                                                                       | 1.60<br>1.60                                                                         | +                                                          | 82.14<br>23.25                                                                                            | --<br>--                                                               | --<br>--                                                                     | --<br>--                                                       |
| Dr.3789.1.A1_at                                                                                                                                                                                                 | similar to solute carrier family 7 (cationic amino acid transporter, y+ system), member 8 (SLC7A8)                                                                                                                                                                                                                                                                                                                   | LOC100007704                                                                                                              | --                                                                                                                                                                                                                                   | ENSDARG00000075831                                                                                                                                                                                             | 1.60                                                                                 | +                                                          | 432.81                                                                                                    | non-GI                                                                 | early                                                                        | --                                                             |
| Dr.9665.1.S1_at<br>Dr.26324.1.A1_at<br>Dr.7977.1.S1_at<br>Dr.2960.1.A1_at<br>Dr.10345.1.A1_at<br>Dr.8014.1.S1_at<br>Dr.1372.1.S1_at<br>Dr.6531.2.S1_at<br>Dr.9288.1.S1_at<br>Dr.9890.1.A1_at<br>Dr.1259.1.A1_at | ras homolog gene family, member Gb<br>acyl-CoA synthetase short-chain family member 1<br>glutathione peroxidase 1a<br>inter-alpha (globulin) inhibitor H4 isoform 2<br>wu:fb14a07<br>B-cell translocation gene 1<br>keratin 18<br>suppressor of cytokine signaling 1<br>insulin-like growth factor 2b<br>hypothetical protein LOC564090<br>similar to peptidyl-glycine alpha-amidating monooxygenase (PAM) precursor | rhoqb<br>zgc:113194<br>gpx1a<br>zgc:112265<br>wu:fb14a07<br>btq1<br>krt18<br>socs1<br>igf2b<br>zgc:193593<br>LOC100148119 | ZDB-GENE-030131-8877<br>ZDB-GENE-050320-139<br>ZDB-GENE-030410-1<br>ZDB-GENE-050626-133<br>ZDB-GENE-030131-8516<br>ZDB-GENE-010726-1<br>ZDB-GENE-030411-6<br>ZDB-GENE-040801-205<br>ZDB-GENE-030131-2935<br>ZDB-GENE-080723-21<br>-- | ENSDARG00000004301<br>ENSDARG00000044142<br>ENSDARG00000018146<br>ENSDARG00000036573<br>--<br>ENSDARG00000027249<br>ENSDARG00000018404<br>ENSDARG00000038095<br>ENSDARG00000033307<br>ENSDARG00000075096<br>-- | 1.59<br>1.59<br>1.59<br>1.59<br>1.58<br>1.57<br>1.56<br>1.55<br>1.54<br>1.54<br>1.54 | --<br>--<br>--<br>--<br>+<br>--<br>+<br>--<br>+<br>+<br>-- | 74.67<br>84.98<br>706.52<br>1231.00<br>345.38<br>788.65<br>501.76<br>108.68<br>187.74<br>445.14<br>380.84 | --<br>GI<br>GI<br>GI<br>--<br>non-GI<br>GI<br>GI<br>GI<br>non-GI<br>-- | --<br>late<br>late<br>late<br>--<br>early<br>--<br>early<br>late<br>--<br>-- | --<br>--<br>--<br>--<br>--<br>--<br>--<br>--<br>--<br>--<br>-- |
| Dr.9492.1.A1_at<br>Dr.15644.1.A1_at<br>Dr.14396.1.A1_at<br>Dr.15382.1.A1_at<br>Dr.96.1.A1_at<br>Dr.23886.1.A1_at<br>Dr.22629.1.A1_x_at<br>Dr.25133.5.A1_at                                                      | sulfide quinone reductase-like (yeast)<br>unknown<br>similar to mucin 2 (MUC2)<br>unknown<br>similar to complement protein component C7-1<br>spondin 2a, extracellular matrix protein<br>unknown<br>hypothetical protein LOC561590                                                                                                                                                                                   | sqrdl<br>--<br>LOC100148804<br>--<br>LOC570832<br>spon2a<br>wu:fi29c05<br>wu:fd20f07                                      | ZDB-GENE-050417-436<br>--<br>--<br>--<br>ZDB-GENE-990415-160<br>--<br>--                                                                                                                                                             | ENSDARG00000017034<br>--<br>ENSDARG00000039253<br>--<br>ENSDARG00000057121<br>ENSDARG00000025465<br>--<br>ENSDARG00000045424                                                                                   | 1.54<br>1.54<br>1.54<br>1.54<br>1.53<br>1.53<br>1.52<br>1.52                         | --<br>--<br>+<br>--<br>+<br>--<br>--<br>--                 | 224.10<br>12.17<br>443.47<br>477.73<br>113.12<br>11.91<br>214.46<br>79.65                                 | GI<br>GI<br>--<br>non-GI<br>--<br>GI<br>--<br>--                       | late<br>--<br>early<br>early<br>late<br>--<br>--<br>--                       | --<br>--<br>--<br>--<br>CGENXEB 456003701 0<br>--<br>--<br>--  |

|                          |                                                                                                                                      |                   |                      |                    |      |    |         |        |       |                     |
|--------------------------|--------------------------------------------------------------------------------------------------------------------------------------|-------------------|----------------------|--------------------|------|----|---------|--------|-------|---------------------|
| Dr.3563.2.S1 at          | transmembrane 4 superfamily member 4                                                                                                 | zgc:92479         | ZDB-GENE-040801-231  | ENSDARG00000040747 | 1.52 | +  | 770.73  | GI     | late  | --                  |
| Dr.18812.1.S1 at         | similar to Upstream stimulatory factor 2 (USF2)                                                                                      | si:dkey-211q8.3   | ZDB-GENE-030131-8475 | ENSDARG00000020228 | 1.51 | -- | 23.30   | --     | --    | --                  |
| Dr.6064.1.A1 at          | novel mucin protein                                                                                                                  | A1L1X2_DANRE      | --                   | ENSDARG00000069841 | 1.51 | -- | 57.13   | non-GI | --    | --                  |
| Dr.12596.1.S1 at         | claudin c                                                                                                                            | clndc             | ZDB-GENE-010328-3    | ENSDARG00000015955 | 1.51 | -- | 185.43  | GI     | --    | --                  |
| Dr.681.1.A1_at           | similar to Dexamethasone-induced Ras-related protein 1 (RASD1)                                                                       | zgc:65909         | ZDB-GENE-040426-1473 | ENSDARG00000019274 | 1.51 | -- | 91.76   | --     | early | --                  |
| Dr.3804.2.A1_a_at        | similar to vacuolar proton translocating ATPase 116 kDa subunit a isoform 2 (ATP6VOA2)                                               | zgc:55891         | ZDB-GENE-040426-2022 | ENSDARG00000076003 | 1.50 | -- | 138.60  | GI     | --    | --                  |
| Dr.8654.2.A1 a at        | septin 7a                                                                                                                            | sept7a            | ZDB-GENE-040426-1008 | ENSDARG00000052673 | 0.66 | -- | 371.43  | non-GI | early | --                  |
| Dr.2045.1.A1 at          | hydroxyacyl-Coenzyme A dehydrogenase                                                                                                 | hadh              | ZDB-GENE-040801-261  | ENSDARG00000030765 | 0.66 | -- | 349.50  | GI     | --    | --                  |
| Dr.7343.1.S1_at          | acyl-Coenzyme A dehydrogenase, C-4 to C-12 straight chain                                                                            | acadm             | ZDB-GENE-040426-1945 | ENSDARG00000038900 | 0.66 | +  | 720.77  | GI     | late  | --                  |
| Dr.23526.1.A1_at         | synovial sarcoma, X breakpoint 2 interacting protein                                                                                 | ssx2ip            | ZDB-GENE-040426-1756 | ENSDARG00000039521 | 0.66 | -- | 11.63   | GI     | --    | --                  |
| Dr.13114.1.A1 at         | ras homolog gene family, member V                                                                                                    | rhov              | ZDB-GENE-031002-10   | ENSDARG00000070434 | 0.66 | +  | 53.91   | --     | --    | --                  |
| Dr.16053.1.S1_at         | similar to Heparin-binding EGF-like growth factor (HBEGF)                                                                            | zgc:175091        | --                   | --                 | 0.66 | -- | 146.16  | --     | early | --                  |
| Dr.26381.1.A1 at         | tubulin, alpha 2                                                                                                                     | tuba2             | ZDB-GENE-040426-1970 | ENSDARG00000045014 | 0.65 | +  | 695.29  | --     | late  | --                  |
| Dr.548.1.S1_at           | odorant receptor, family C, subfamily 103, member 4                                                                                  | or103-4           | ZDB-GENE-000329-12   | ENSDARG00000030900 | 0.65 | -- | 16.50   | GI     | --    | --                  |
| Dr.16609.2.A1_at         | TRNA-yW synthesizing protein 3 homolog (S. cerevisiae)                                                                               | tyw3              | ZDB-GENE-040718-355  | ENSDARG00000038222 | 0.65 | -- | 33.09   | --     | --    | --                  |
| Dr.16257.1.A1 at         | unknown                                                                                                                              | --                | --                   | --                 | 0.64 | -- | 73.87   | --     | --    | --                  |
| Dr.16229.1.A1 at         | unknown                                                                                                                              | --                | --                   | --                 | 0.64 | -- | 133.06  | GI     | --    | --                  |
| Dr.8097.1.S1 at          | opsin 1 (cone pigments), short-wave-sensitive 2                                                                                      | opn1sw2           | ZDB-GENE-990604-40   | ENSDARG00000017274 | 0.63 | -- | 1821.51 | non-GI | --    | --                  |
| Dr.558.1.S1 at           | visual system homeobox 1 homolog, chx10-like                                                                                         | vsx1              | ZDB-GENE-990415-205  | ENSDARG00000056292 | 0.63 | -- | 107.65  | non-GI | --    | --                  |
| Dr.24284.1.A1_at         | novel protein similar to gastrin-releasing peptide (GRP)                                                                             | B8A4X5_DANRE      | ZDB-GENE-090313-9    | ENSDARG00000060656 | 0.63 | -- | 25.29   | non-GI | --    | --                  |
| Dr.6928.3.S1_at          | similar to Quinoid dihydropteridine reductase (QDPR)(Dihydropteridine reductase)                                                     | zgc:171517        | ZDB-GENE-080219-12   | ENSDARG00000070071 | 0.63 | -- | 354.85  | --     | --    | --                  |
| Dr.3521.1.A1 at          | unknown                                                                                                                              | --                | --                   | --                 | 0.63 | -- | 135.59  | non-GI | early | --                  |
| Dr.15054.1.S1 at         | retinol binding protein 2a, cellular                                                                                                 | rbp2a             | ZDB-GENE-020320-2    | ENSDARG00000070038 | 0.62 | -- | 894.29  | --     | --    | --                  |
| Dr.21859.1.A1 at         | similar to serine protease 36 (PRSS36)                                                                                               | zgc:100868        | ZDB-GENE-040801-33   | ENSDARG00000004748 | 0.61 | -- | 153.16  | non-GI | --    | --                  |
| Dr.7853.1.A1 at          | dynein, cytoplasmic 1, heavy chain 1                                                                                                 | dync1h1           | ZDB-GENE-030131-7050 | ENSDARG00000014717 | 0.60 | -- | 54.37   | --     | --    | --                  |
| Dr.18599.1.S1 at         | fatty acid binding protein 6, ileal (gastrotopin)                                                                                    | fabp6             | ZDB-GENE-040625-49   | ENSDARG00000044566 | 0.60 | -- | 888.83  | GI     | late  | --                  |
| Dr.15733.1.S1 at         | unknown                                                                                                                              | --                | --                   | --                 | 0.59 | +  | 55.08   | GI     | late  | --                  |
| Dr.4060.1.S1_at          | hydroxyacyl-Coenzyme A dehydrogenase/3-ketoacyl-Coenzyme A thiolase/enoyl-Coenzyme A hydratase (trifunctional protein), beta subunit | hadhb             | ZDB-GENE-030131-8550 | ENSDARG00000057147 | 0.59 | -- | 487.05  | GI     | --    | --                  |
| Dr.17493.1.S1 s at       | hypothetical protein LOC560538                                                                                                       | LOC560538         | --                   | --                 | 0.58 | -- | 13.69   | GI     | --    | --                  |
| Dr.23038.1.A1 at         | unknown                                                                                                                              | --                | --                   | --                 | 0.57 | -- | 10.40   | --     | --    | --                  |
| Dr.11310.3.S1 at         | tubulin, alpha 1, like 2                                                                                                             | tuba1l2           | ZDB-GENE-051127-7    | ENSDARG00000001889 | 0.57 | -- | 140.22  | non-GI | early | --                  |
| Dr.12478.1.S1 at         | unknown                                                                                                                              | --                | --                   | --                 | 0.57 | -- | 149.13  | non-GI | --    | --                  |
| Dr.11252.1.A1_at         | similar to creatine kinase, mitochondrial 2 sarcomeric (CKMT2)                                                                       | zgc:56085         | ZDB-GENE-030131-5717 | ENSDARG00000069615 | 0.57 | -- | 330.56  | non-GI | --    | --                  |
| Dr.15687.2.S1_a_at       | 2,4-dienoyl-CoA reductase, mitochondrial precursor                                                                                   | decr1 (zgc:92356) | ZDB-GENE-040718-142  | ENSDARG0000003869  | 0.56 | -- | 44.40   | GI     | --    | --                  |
| Dr.467.1.A1_at           | similar to Electron transfer flavoprotein-ubiquinone oxidoreductase, mitochondrial precursor                                         | zgc:92093         | ZDB-GENE-040912-168  | ENSDARG00000038834 | 0.56 | -- | 128.99  | GI     | late  | --                  |
| Dr.2188.1.S1 at          | glycerol-3-phosphate dehydrogenase 1 (soluble)                                                                                       | gpd1              | ZDB-GENE-040426-2576 | ENSDARG00000036942 | 0.56 | -- | 142.20  | --     | --    | CGENXEB 456002354 0 |
| Dr.8102.1.S1_at          | opsin 1 (cone pigments), medium-wave-sensitive, 1                                                                                    | opn1mw1           | ZDB-GENE-990604-42   | ENSDARG00000044280 | 0.55 | -- | 1155.42 | non-GI | --    | --                  |
| AFFX-Dr-NM 131175-1 s at | opsin 1 (cone pigments), long-wave-sensitive, 1                                                                                      | opn1lw1           | ZDB-GENE-990604-41   | ENSDARG00000044862 | 0.53 | -- | 889.89  | non-GI | --    | --                  |
| Dr.12733.1.A1_at         | similar to cytochrome P450, family 2, subfamily W, polypeptide 1 (CYP2W1)                                                            | zgc:66268         | ZDB-GENE-040426-1584 | ENSDARG00000038366 | 0.52 | -- | 196.40  | GI     | late  | --                  |
| Dr.16372.1.A1_at         | similar to Inositol polyphosphate 5-phosphatase K (SKIP)                                                                             | zgc:162883        | --                   | --                 | 0.52 | -- | 19.96   | non-GI | early | --                  |
| Dr.24261.1.S1 at         | fatty acid binding protein 1b                                                                                                        | fabp1b            | ZDB-GENE-050522-96   | ENSDARG00000059227 | 0.52 | -- | 468.69  | GI     | --    | --                  |
| Dr.1254.1.A1 at          | collagen, type V, alpha 2-like                                                                                                       | col5a2l           | ZDB-GENE-030616-13   | --                 | 0.52 | -- | 12.54   | --     | --    | --                  |
| Dr.25442.1.A1_at         | elongation of very long chain fatty acids (FEN1/Elo2, SUR4/Elo3, yeast)-like 4                                                       | elovl4            | ZDB-GENE-030131-7672 | ENSDARG00000027495 | 0.50 | +  | 164.36  | non-GI | --    | --                  |
| Dr.9876.1.S1_at          | guanine nucleotide binding protein (G protein), gamma transducing activity polypeptide 2                                             | gngt2             | ZDB-GENE-030131-7595 | ENSDARG00000010680 | 0.47 | -- | 98.61   | non-GI | --    | --                  |
| Dr.18459.1.S1 at         | novel trypsin-like serine protease                                                                                                   | zgc:92590         | ZDB-GENE-041024-15   | ENSDARG00000040282 | 0.47 | +  | 509.61  | GI     | late  | --                  |
| Dr.8153.1.S1 at          | claudin g                                                                                                                            | clndg             | ZDB-GENE-060421-5306 | ENSDARG00000003701 | 0.46 | -- | 85.31   | GI     | late  | --                  |
| Dr.8143.1.S1 at          | fatty acid binding protein 2, intestinal                                                                                             | fabp2             | ZDB-GENE-991019-5    | ENSDARG00000006427 | 0.45 | +  | 1565.21 | GI     | --    | --                  |
| Dr.11305.1.A1 at         | quanylase kinase 1                                                                                                                   | quk1              | ZDB-GENE-020916-1    | ENSDARG00000005776 | 0.44 | -- | 41.82   | non-GI | --    | --                  |

|                  |                                                                                                               |            |                     |                    |      |    |        |    |       |                     |
|------------------|---------------------------------------------------------------------------------------------------------------|------------|---------------------|--------------------|------|----|--------|----|-------|---------------------|
| Dr.765.1.A1_at   | hydroxyacyl-Coenzyme A dehydrogenase/3-ketoacyl-Coenzyme A thiolase/enoyl-Coenzyme A hydratase, alpha subunit | hadha      | --                  | --                 | 0.43 | -- | 187.21 | GI | --    | --                  |
| Dr.6143.1.A1_at  | gamma-butyrobetaine hydroxylase                                                                               | bbox1      | ZDB-GENE-050417-218 | ENSDARG00000036135 | 0.43 | -- | 170.02 | GI | late  | --                  |
| Dr.3238.1.A1_at  | kruppel-like factor 11a                                                                                       | kif11a     | ZDB-GENE-060825-95  | ENSDARG00000030844 | 0.41 | -- | 224.04 | -- | early | --                  |
| Dr.12241.1.A1_at | carnitine palmitoyltransferase 1B (muscle)                                                                    | cpt1b      | ZDB-GENE-041010-9   | ENSDARG00000058285 | 0.38 | -- | 42.16  | GI | --    | CGENXEB_456010085_0 |
| Dr.12817.1.A1_at | angiopoietin-like factor 4 (fasting-induced adipose factor)                                                   | angptl4    | ZDB-GENE-041111-222 | ENSDARG00000035859 | 0.35 | +  | 647.14 | -- | --    | CGENXEB_456004079_0 |
| Dr.9448.1.A1_at  | kruppel-like factor 11b                                                                                       | kif11b     | ZDB-GENE-061103-82  | ENSDARG00000013794 | 0.24 | -- | 48.58  | -- | --    | CGENXEB_456013370_0 |
| Dr.14719.1.A1_at | hypothetical protein LOC550402                                                                                | zgc:112199 | ZDB-GENE-050417-205 | --                 | 0.17 | -- | 26.50  | -- | --    | --                  |

<sup>a</sup> If a probe set represents multiple zebrafish transcripts, those genes are listed together separated by "///".

<sup>b</sup> Fold difference of transcript level in 6dpf zebrafish larvae is shown as CONVD/GF.

<sup>c</sup> Probe sets with <5% false discovery rate using Significance Analysis for Microarrays software (SAM) are indicated by "+".

<sup>d</sup> Relative expression level for each probe set is shown as mean intensity across all microarrays after normalization.

<sup>e</sup> Probe sets previously found to be enriched in the transcriptomes of FAC-sorted cells from the gastrointestinal tract (GI) vs. other tissues (non-GI) in conventionally-raised zebrafish larvae at 4dpf or 6dpf (Stuckenholtz et al., 2009).

<sup>f</sup> Probe sets previously found to display increased expression in FAC-sorted gastrointestinal tract cells from conventionally-raised zebrafish during early (2dpf-3dpf) vs. late developmental stages (4dpf-6dpf; Stuckenholtz et al., 2009).

<sup>g</sup> Compugen probe IDs that were previously found to display differential expression in gastrointestinal tracts from GF compared to CONVD or CONV-R zebrafish at 6dpf (Rawls et al., 2004) are shown next to their corresponding zebrafish transcript.
