# Supplementary material
Source: PubMed Central journal article supplement (PMC3164861)
Supplement: NIHMS287381-supplement-03.pdf [file NIHMS287381-supplement-03.pdf]

**Table S2: Human transcripts that are homologous to zebrafish transcripts represented by Affymetrix probe sets differentially expressed in CONVD compared to GF zebrafish larvae at 6dpf**

| Zebrafish probe set ID <sup>a</sup> | Fold-difference <sup>b</sup> | Human gene accession <sup>c</sup> | Human gene name <sup>c</sup>                                  | Human gene symbol <sup>c</sup> |
|-------------------------------------|------------------------------|-----------------------------------|---------------------------------------------------------------|--------------------------------|
| AFFX-Dr-NM_131175-1_s_at            | 0.53                         | NM_020061                         | opsin 1 (cone pigments), long-wave-sensitive                  | OPN1LW                         |
|                                     |                              | NM_000513                         | opsin 1 (cone pigments), medium-wave-sensitive                | OPN1MW                         |
|                                     |                              | NM_001048181                      | opsin 1 (cone pigments), medium-wave-sensitive 2              | OPN1MW2                        |
| Dr.10250.1.A1_at                    | 1.96                         | AJ301562                          | L-threonine dehydrogenase                                     | TDH                            |
| Dr.10314.1.S1_a_at                  | 5.05                         | X75308                            | matrix metalloproteinase 13                                   | MMP13                          |
| Dr.10345.1.A1_at                    | 1.58                         | --                                | --                                                            | --                             |
| Dr.10376.1.S1_at                    | 2.87                         | NM_032488                         | cornifelin                                                    | CNFN                           |
| Dr.10624.1.S1_at                    | 2.85                         | BC021683                          | peroxiredoxin 1                                               | PRDX1                          |
| Dr.10713.1.S1_at                    | 1.65                         | NM_000701                         | ATPase, Na <sup>+</sup> /K <sup>+</sup> transporting, alpha 1 | ATP1A1                         |
| Dr.10728.1.S1_at                    | 1.65                         | BC005278                          | glucagon                                                      | GCG                            |
| Dr.1082.1.S1_at                     | 1.60                         | AY151286                          | prostaglandin-endoperoxide synthase 2                         | PTGS2                          |
| Dr.11252.1.A1_at                    | 0.57                         | BC029140                          | creatine kinase, mitochondrial 2 (sarcomeric)                 | CKMT2                          |
| Dr.11290.1.A1_at                    | 1.86                         | BC015089                          | midnolin                                                      | MIDN                           |
| Dr.11305.1.A1_at                    | 0.44                         | BC006249                          | guanylate kinase 1                                            | GUK1                           |
| Dr.11310.3.S1_at                    | 0.57                         | NM_006009                         | tubulin, alpha 3                                              | TUBA3                          |
| Dr.12241.1.A1_at                    | 0.38                         | NM_004377                         | carnitine palmitoyltransferase 1B (muscle)                    | CPT1B                          |
| Dr.12369.1.A1_at                    | 1.67                         | BC034694                          | sulfotransferase family, cytosolic, 2B, member 1              | SULT2B1                        |
| Dr.12399.1.S1_at                    | 2.04                         | M74178                            | macrophage stimulating 1 (hepatocyte growth factor-like)      | MST1                           |
| Dr.12478.1.S1_at                    | 0.57                         | --                                | --                                                            | --                             |
| Dr.12491.1.A1_at                    | 4.90                         | NM_000592                         | complement component 4B                                       | C4B                            |
|                                     |                              | NM_007293                         | complement component 4A                                       | C4A                            |
| Dr.1254.1.A1_at                     | 0.52                         | NM_000393                         | collagen, type V, alpha 2                                     | COL5A2                         |
| Dr.1259.1.A1_at                     | 1.54                         | BC018127                          | peptidyl-glycine alpha-amidating monooxygenase                | PAM                            |
| Dr.12596.1.S1_at                    | 1.51                         | BC065830                          | claudin 9                                                     | CLDN9                          |
| Dr.12725.1.A1_at                    | 2.50                         | NM_024636                         | STEAP family member 4                                         | STEAP4                         |
| Dr.12733.1.A1_at                    | 0.52                         | NM_017781                         | cytochrome P450, family 2, subfamily W, polypeptide 1         | CYP2W1                         |
| Dr.12770.1.S1_at                    | 2.50                         | --                                | --                                                            | --                             |
| Dr.1280.1.A1_at                     | 2.40                         | M83667                            | CCAAT/enhancer binding protein (C/EBP), delta                 | CEBPD                          |
| Dr.1280.1.A2_at                     | 2.20                         | M83667                            | CCAAT/enhancer binding protein (C/EBP), delta                 | CEBPD                          |
| Dr.12817.1.A1_at                    | 0.35                         | AF202636                          | angiopoietin-like 4                                           | ANGPTL4                        |
| Dr.13114.1.A1_at                    | 0.66                         | AF211836                          | ras homolog gene family, member U                             | ARHU                           |
| Dr.13131.1.S1_at                    | 8.96                         | BC007022                          | serum amyloid A1                                              | SAA1                           |
|                                     |                              | NM_030754                         | serum amyloid A2                                              | SAA2                           |
|                                     |                              | NM_006512                         | serum amyloid A4                                              | SAA4                           |
| Dr.1368.4.A1_at                     | 1.62                         | --                                | --                                                            | --                             |
| Dr.1372.1.S1_at                     | 1.56                         | NM_000224                         | keratin 18                                                    | KRT18                          |
| Dr.13972.1.S1_at                    | 3.25                         | AL136668                          | Hypothetical protein                                          | DDIT4                          |
| Dr.14396.1.A1_at                    | 1.54                         | L21998                            | mucin 2, intestinal/tracheal                                  | MUC2                           |
| Dr.14415.1.A1_at                    | 1.76                         | NM_001007527                      | LMBR1 domain containing 2                                     | LMBRD2                         |
| Dr.14719.1.A1_at                    | 0.17                         | NM_001024228                      | ADP-ribosylation factor 1                                     | ARF1                           |
| Dr.148.1.A1_at                      | 1.74                         | --                                | --                                                            | --                             |
| Dr.14944.1.A1_at                    | 1.82                         | NM_005923                         | mitogen-activated protein kinase kinase kinase 5              | MAP3K5                         |
| Dr.14963.1.A1_at                    | 2.00                         | AB015628                          | C-type lectin, superfamily member 2 (activation-induced)      | CLECSF2                        |
|                                     |                              | BC012621                          | killer cell lectin-like receptor subfamily G, member 1        | KLRG1                          |
|                                     |                              | NM_207390                         | C-type lectin domain family 17, member A                      | CLEC17A                        |
|                                     |                              | NM_014358                         | C-type lectin domain family 4, member E                       | CLEC4E                         |
| Dr.15004.1.A1_at                    | 1.77                         | --                                | --                                                            | --                             |
| Dr.15054.1.S1_at                    | 0.62                         | U13831                            | retinol binding protein 2, cellular                           | RBP2                           |
| Dr.15281.1.A1_at                    | 4.89                         | S48568                            | tissue inhibitor of metalloproteinase 2                       | TIMP2                          |
| Dr.15382.1.A1_at                    | 1.54                         | --                                | --                                                            | --                             |
| Dr.15644.1.A1_at                    | 1.54                         | --                                | --                                                            | --                             |
| Dr.15687.2.S1_a_at                  | 0.56                         | L26050                            | 2,4-dienoyl CoA reductase 1, mitochondrial                    | DECR1                          |
| Dr.15733.1.S1_at                    | 0.59                         | --                                | --                                                            | --                             |
| Dr.15942.1.S1_at                    | 2.41                         | NM_003963                         | transmembrane 4 L six family member 5                         | TM4SF5                         |
| Dr.1605.1.S1_at                     | 1.70                         | NM_000295                         | serine proteinase inhibitor, clade A, member 1                | SERPINA1                       |
| Dr.16053.1.S1_at                    | 0.66                         | NM_001945                         | heparin-binding EGF-like growth factor                        | HBEGF                          |
| Dr.16095.1.S1_at                    | 1.93                         | CR595377                          | insulin-like growth factor binding protein 1                  | IGFBP1                         |
| Dr.16229.1.A1_at                    | 0.64                         | --                                | --                                                            | --                             |
| Dr.16257.1.A1_at                    | 0.64                         | --                                | --                                                            | --                             |
| Dr.16372.1.A1_at                    | 0.52                         | NM_016532                         | inositol polyphosphate-5-phosphatase K                        | INPP5K                         |
| Dr.16392.1.A1_at                    | 2.36                         | BC035723                          | complement component 6                                        | C6                             |
| Dr.1659.1.A1_at                     | 1.62                         | --                                | --                                                            | --                             |
| Dr.16609.2.A1_at                    | 0.65                         | NM_138467                         | tRNA-yW synthesizing protein 3 homolog (S. cerevisiae)        | TYW3                           |
| Dr.17437.1.S1_at                    | 2.25                         | AF326976                          | C1q and tumor necrosis factor related protein 3               | C1QTNF3                        |
| Dr.17438.1.S1_at                    | 1.92                         | NM_052864                         | TRAF-interacting protein with a forkhead-associated domain    | TIFA                           |
| Dr.17459.1.S1_a_at                  | 1.62                         | NM_002218                         | inter-alpha (globulin) inhibitor H4                           | ITI4H                          |
| Dr.17470.1.S1_at                    | 2.87                         | NM_001002036                      | astacin-like metallo-endopeptidase (M12 family)               | ASTL                           |
| Dr.17493.1.S1_s_at                  | 0.58                         | --                                | --                                                            | --                             |
| Dr.17570.2.A1_at                    | 1.64                         | AF237775                          | MAP kinase interacting serine/threonine kinase 2              | MKNK2                          |
| Dr.17591.1.S1_at                    | 4.19                         | NM_001008223                      | complement component 1, q subcomponent-like 4                 | C1QL4                          |

|                    |       |           |                                                                                                          |           |
|--------------------|-------|-----------|----------------------------------------------------------------------------------------------------------|-----------|
| Dr.17761.1.S1_at   | 2.06  | X14787    | thrombospondin 1                                                                                         | THBS1     |
| Dr.18429.1.A1_at   | 3.04  | M16967    | coagulation factor V (proaccelerin, labile factor)                                                       | F5        |
| Dr.18459.1.S1_at   | 0.47  | NR_001296 | trypsinogen C (TRY6) on chromosome 7                                                                     | TRY6      |
|                    |       | AY052783  | Protease serine 4 isoform B                                                                              | AY052783  |
| Dr.18599.1.S1_at   | 0.60  | BC022489  | fatty acid binding protein 6, ileal (gastrotropin)                                                       | FABP6     |
| Dr.18756.1.S1_at   | 24.19 | --        | --                                                                                                       | --        |
| Dr.18812.1.S1_at   | 1.51  | X90824    | upstream transcription factor 2, c-fos interacting                                                       | USF2      |
| Dr.18834.1.S1_at   | 1.91  | XR_018102 | similar to Uricase (Urate oxidase)                                                                       | LOC391051 |
|                    |       | NR_003927 | urate oxidase (pseudogene)                                                                               | UOX       |
| Dr.18835.2.S1_at   | 6.41  | BC062415  | Microfibrillar-associated protein 4                                                                      | MFAP4     |
| Dr.1889.1.S1_at    | 1.78  | NM_001063 | transferrin                                                                                              | TF        |
|                    |       | X53961    | lactotransferrin                                                                                         | LTF       |
| Dr.1889.2.A1_a_at  | 2.60  | NM_001063 | transferrin                                                                                              | TF        |
|                    |       | X53961    | lactotransferrin                                                                                         | LTF       |
| Dr.190.1.S1_at     | 5.06  | NM_001710 | complement factor B                                                                                      | CFB       |
| Dr.19560.1.S1_at   | 1.69  | BC001880  | insulin induced gene 1                                                                                   | INSIG1    |
| Dr.19799.1.A1_at   | 2.63  | D80010    | lipin 1                                                                                                  | LPIN1     |
| Dr.19902.1.S1_at   | 1.96  | X12451    | cathepsin L1                                                                                             | CTSL1     |
|                    |       | NM_001333 | cathepsin L2                                                                                             | CTSL2     |
| Dr.20030.1.S1_at   | 2.29  | BC111992  | melanocortin 4 receptor                                                                                  | MC4R      |
| Dr.20185.1.S1_at   | 2.04  | M15856    | lipoprotein lipase                                                                                       | LPL       |
| Dr.20270.1.S1_at   | 2.31  | BC020766  | C-reactive protein, pentraxin-related                                                                    | CRP       |
| Dr.20291.1.A1_at   | 4.09  | K02765    | complement component 3                                                                                   | C3        |
| Dr.2045.1.A1_at    | 0.66  | NM_005327 | hydroxyacyl-Coenzyme A dehydrogenase (HADH), nuclear gene encoding mitochondrial protein                 | HADH      |
| Dr.20479.1.S1_at   | 1.81  | AB018551  | chromosome 16 open reading frame 7                                                                       | C16orf7   |
| Dr.20821.1.A1_at   | 2.06  | X05199    | plasminogen                                                                                              | PLG       |
| Dr.21005.1.S1_s_at | 5.88  | K02765    | complement component 3                                                                                   | C3        |
| Dr.21859.1.A1_at   | 0.61  | NM_173502 | protease, serine, 36                                                                                     | PRSS36    |
|                    |       | NM_002773 | protease, serine, 8                                                                                      | PRSS8     |
| Dr.2188.1.S1_at    | 0.56  | L34041    | glycerol-3-phosphate dehydrogenase 1 (soluble)                                                           | GPD1      |
| Dr.22129.1.A1_at   | 2.48  | NM_022157 | Ras-related GTP binding C                                                                                | RRAGC     |
| Dr.22133.1.S1_at   | 1.97  | --        | --                                                                                                       | --        |
| Dr.22145.1.A1_at   | 3.48  | NM_001710 | complement factor B                                                                                      | CFB       |
| Dr.22217.1.A1_at   | 3.09  | NM_002113 | complement factor H-related 1                                                                            | CFHL1     |
| Dr.22629.1.A1_x_at | 1.52  | --        | --                                                                                                       | --        |
| Dr.23038.1.A1_at   | 0.57  | --        | --                                                                                                       | --        |
| Dr.23512.1.A1_at   | 2.33  | --        | --                                                                                                       | --        |
| Dr.23526.1.A1_at   | 0.66  | NM_014021 | synovial sarcoma, X breakpoint 2 interacting protein                                                     | SSX2IP    |
| Dr.23731.1.A1_at   | 4.33  | K02765    | complement component 3                                                                                   | C3        |
| Dr.23886.1.A1_at   | 1.53  | NM_012445 | spondin 2, extracellular matrix protein                                                                  | SPON2     |
| Dr.24261.1.S1_at   | 0.52  | NM_001443 | fatty acid binding protein 1, liver                                                                      | FABP1     |
| Dr.24284.1.A1_at   | 0.63  | NM_002091 | gastrin-releasing peptide                                                                                | GRP       |
| Dr.24483.1.S1_at   | 1.68  | --        | --                                                                                                       | --        |
| Dr.24507.1.S1_at   | 1.91  | BC002601  | nuclear factor of kappa light polypeptide gene enhancer in B-cells inhibitor, alpha                      | IKBA      |
| Dr.2452.1.A1_at    | 2.86  | NM_001737 | complement component 9                                                                                   | C9        |
| Dr.2452.2.A1_a_at  | 3.11  | NM_001737 | complement component 9                                                                                   | C9        |
| Dr.2452.2.A1_x_at  | 2.93  | NM_001737 | complement component 9                                                                                   | C9        |
| Dr.24729.1.S1_x_at | 1.67  | --        | --                                                                                                       | --        |
| Dr.25133.5.A1_at   | 1.52  | BC020238  | signal recognition particle 68kDa                                                                        | SRP68     |
| Dr.25155.1.S1_s_at | 1.75  | BC007075  | hemoglobin, beta                                                                                         | HBB       |
|                    |       | AY034468  | hemoglobin, delta                                                                                        | HBD       |
|                    |       | M15386    | hemoglobin gamma-G (Fragment)                                                                            | HBG2      |
|                    |       | BC020719  | hemoglobin, gamma A                                                                                      | HBG1      |
|                    |       | BC015537  | hemoglobin, epsilon 1                                                                                    | HBE1      |
| Dr.25195.1.S1_at   | 4.80  | BC066909  | Hypothetical protein LOC129138                                                                           | LOC129138 |
| Dr.25214.1.A1_at   | 1.64  | L13286    | cytochrome P450, family 24, subfamily A, polypeptide 1                                                   | CYP24A1   |
| Dr.25219.1.A1_at   | 1.92  | M33491    | trypsin beta 1                                                                                           | TPSB1     |
|                    |       | AK122625  | CDNA FLJ16046 fis, clone CTONG2013178, weakly similar to Homo sapiens serine protease DESC1 (DESC1) mRNA | AK122625  |
|                    |       | AK075142  | Polyserase-2 precursor (EC 3.4.21.-) (Polyserine protease-2)                                             | AK075142  |
|                    |       | BC041609  | Similar to distal intestinal serine protease                                                             | BC041609  |
|                    |       | U75329    | transmembrane protease, serine 2                                                                         | TMPRSS2   |
|                    |       | AF216312  | transmembrane protease, serine 4                                                                         | TMPRSS4   |
|                    |       | AY358458  | ECHOS1                                                                                                   | AY358458  |
|                    |       | U09860    | protease, serine, 7 (enterokinase)                                                                       | PRSS7     |
|                    |       | BC029356  | trypsin beta 2                                                                                           | TPSB2     |
|                    |       | NM_001907 | chymotrypsin-like                                                                                        | CTRL      |
| Dr.25442.1.A1_at   | 0.50  | AY037298  | elongation of very long chain fatty acids (FEN1/Elo2, SUR4/Elo3, yeast)-like 4                           | ELOVL4    |
| Dr.25449.1.A1_at   | 1.82  | AB042823  | RecQ protein-like 5                                                                                      | RECQL5    |
| Dr.25727.1.A1_at   | 1.62  | BC031574  | mitogen-activated protein kinase 14                                                                      | MAPK14    |

|                   |      |              |                                                                                                                                                      |           |
|-------------------|------|--------------|------------------------------------------------------------------------------------------------------------------------------------------------------|-----------|
| Dr.25944.1.A1_at  | 1.77 | --           | --                                                                                                                                                   | --        |
| Dr.26268.1.A1_at  | 1.91 | NM_006770    | macrophage receptor with collagenous structure                                                                                                       | MARCO     |
| Dr.26324.1.A1_at  | 1.59 | NM_032501    | acyl-CoA synthetase short-chain family member 1 (ACSS1), nuclear gene encoding mitochondrial protein                                                 | ACSS1     |
| Dr.26381.1.A1_at  | 0.65 | NM_006082    | tubulin, alpha 1b                                                                                                                                    | TUBA1B    |
| Dr.26478.1.S1_at  | 1.60 | BC011721     | tubulin, alpha 2                                                                                                                                     | TUBA2     |
| Dr.26483.1.S1_at  | 1.85 | BC035058     | protein kinase, cAMP-dependent, catalytic, beta                                                                                                      | PRKACB    |
| Dr.2655.1.S1_at   | 2.32 | NM_014584    | ERO1-like                                                                                                                                            | ERO1L     |
|                   |      | U70136       | proteoglycan 4, (megakaryocyte stimulating factor, articular superficial zone protein, camptodactyly, arthropathy, coxa vara, pericarditis syndrome) | PRG4      |
| Dr.2829.1.A1_at   | 1.68 | --           | --                                                                                                                                                   | --        |
| Dr.2960.1.A1_at   | 1.59 | NM_002218    | inter-alpha (globulin) inhibitor H4                                                                                                                  | ITI4H     |
| Dr.2973.1.A1_at   | 2.99 | BC002816     | neutrophil cytosolic factor 1 (47kDa, chronic granulomatous disease, autosomal 1)                                                                    | NCF1      |
| Dr.2999.1.S1_at   | 1.99 | NM_002727    | serglycin                                                                                                                                            | SRGN      |
| Dr.3238.1.A1_at   | 0.41 | NM_003597    | Kruppel-like factor 11                                                                                                                               | KLF11     |
| Dr.3444.2.S1_at   | 2.33 | BC100883     | Lysozyme g-like protein 2 precursor                                                                                                                  | LYG2      |
| Dr.3521.1.A1_at   | 0.63 | --           | --                                                                                                                                                   | --        |
| Dr.3563.2.S1_at   | 1.52 | NM_004617    | Transmembrane 4 superfamily member 4                                                                                                                 | TM4SF4    |
| Dr.3585.1.S1_at   | 5.97 | BT006851     | Angiotensinogen                                                                                                                                      | AGT       |
| Dr.360.1.A1_at    | 1.69 | AL110209     | lysophospholipase 3 (lysosomal phospholipase A2)                                                                                                     | LYPLA3    |
| Dr.3645.1.S1_at   | 1.98 | X05199       | plasminogen                                                                                                                                          | PLG       |
| Dr.3789.1.A1_at   | 1.60 | AB037669     | solute carrier family 7 (cationic amino acid transporter, y+ system), member 8                                                                       | SLC7A8    |
| Dr.3804.2.A1_a_at | 1.50 | NM_012463    | ATPase, H+ transporting, lysosomal V0 subunit a2                                                                                                     | ATP6V0A2  |
|                   |      | U45285       | T-cell, immune regulator 1, ATPase, H+ transporting, lysosomal V0 protein a isoform 3                                                                | TCIRG1    |
| Dr.4060.1.S1_at   | 0.59 | D16481       | hydroxyacyl-Coenzyme A dehydrogenase/3-ketoacyl-Coenzyme A thiolase/enoyl-Coenzyme A hydratase (trifunctional protein), beta subunit                 | HADHB     |
| Dr.4103.1.A1_at   | 1.91 | NM_000186    | complement factor H                                                                                                                                  | CFH       |
|                   |      | BC022283     | H factor (complement)-like 3                                                                                                                         | HFL3      |
| Dr.4654.1.A1_at   | 1.69 | NM_014330    | protein phosphatase 1, regulatory (inhibitor) subunit 15A                                                                                            | PPP1R15A  |
| Dr.4654.2.S1_a_at | 1.62 | NM_014330    | protein phosphatase 1, regulatory (inhibitor) subunit 15A                                                                                            | PPP1R15A  |
| Dr.4654.2.S1_at   | 1.77 | NM_014330    | protein phosphatase 1, regulatory (inhibitor) subunit 15A                                                                                            | PPP1R15A  |
| Dr.467.1.A1_at    | 0.56 | BX538129     | electron-transferring-flavoprotein dehydrogenase                                                                                                     | ETFDH     |
| Dr.4676.1.A1_at   | 3.14 | --           | --                                                                                                                                                   | --        |
| Dr.4748.1.S1_at   | 1.77 | BT006844     | granulin                                                                                                                                             | GRN       |
| Dr.4863.1.A1_at   | 5.97 | XM_939359    | similar to apical early endosomal glycoprotein                                                                                                       | LOC650269 |
| Dr.4863.2.S1_at   | 4.92 | XM_939359    | similar to apical early endosomal glycoprotein                                                                                                       | LOC650269 |
| Dr.4868.1.A1_at   | 1.70 | --           | --                                                                                                                                                   | --        |
| Dr.4907.1.S1_at   | 2.02 | NM_021870    | fibrinogen, gamma polypeptide                                                                                                                        | FGG       |
| Dr.4937.1.A1_at   | 3.50 | NM_004406    | deleted in malignant brain tumors 1 isoform a                                                                                                        | DMBT1     |
| Dr.4957.1.S1_at   | 1.69 | BC017197     | Myeloid cell differentiation protein (Myeloid cell leukemia protein 1) (Myeloid cell leukemia sequence 1) (BCL2-related)                             | MCL1      |
| Dr.5356.1.A1_at   | 2.24 | NM_022153    | chromosome 10 open reading frame 54 (platelet receptor G124)                                                                                         | C10orf54  |
| Dr.5461.1.A1_at   | 2.85 | NM_001861    | cytochrome c oxidase subunit IV isoform 1                                                                                                            | COX4I1    |
|                   |      | AF257180     | cytochrome c oxidase subunit IV isoform 2                                                                                                            | COX4I2    |
| Dr.5462.1.S1_at   | 2.60 | J00129       | fibrinogen, B beta polypeptide                                                                                                                       | FGB       |
| Dr.548.1.S1_at    | 0.65 | NM_001003745 | olfactory receptor, family 10, subfamily A,                                                                                                          | OR10A3    |
|                   |      | NM_001005285 | olfactory receptor, family 2, subfamily AT, member 4                                                                                                 | OR2AT4    |
| Dr.5573.1.S1_at   | 1.82 | NM_138450    | ADP-ribosylation factor-like 11                                                                                                                      | ARL11     |
| Dr.558.1.S1_at    | 0.63 | NM_014588    | visual system homeobox 1 homolog                                                                                                                     | VSX1      |
| Dr.6064.1.A1_at   | 1.51 | L21998       | mucin 2, intestinal/tracheal                                                                                                                         | MUC2      |
| Dr.6143.1.A1_at   | 0.43 | NM_003986    | butyrobetaine (gamma), 2-oxoglutarate dioxygenase                                                                                                    | BBOX1     |
| Dr.6431.1.S1_at   | 3.66 | AF159854     | suppressor of cytokine signaling 3                                                                                                                   | SOCS3     |
| Dr.6531.2.S1_at   | 1.55 | NM_003745    | suppressor of cytokine signaling 3                                                                                                                   | SOCS3     |
| Dr.6575.1.S1_at   | 2.06 | BC021931     | suppressor of cytokine signaling 1                                                                                                                   | SOCS1     |
| Dr.6604.2.A1_a_at | 1.61 | BX537399     | CCAAT/enhancer binding protein (C/EBP), beta                                                                                                         | CEBPB     |
| Dr.681.1.A1_at    | 1.51 | NM_016084    | protein phosphatase 1, regulatory (inhibitor) subunit 3C                                                                                             | PPP1R3C   |
| Dr.6845.1.S1_at   | 3.12 | K02765       | RAS, dexamethasone-induced 1                                                                                                                         | RASD1     |
| Dr.6928.3.S1_at   | 0.63 | M16447       | complement component 3                                                                                                                               | C3        |
| Dr.7343.1.S1_at   | 0.66 | AF251043     | quinoid dihydropteridine reductase                                                                                                                   | QDPR      |
|                   |      |              | acyl-Coenzyme A dehydrogenase, C-4 to C-12 straight chain                                                                                            | ACADM     |
| Dr.7365.1.A1_at   | 1.99 | AF165281     | ATP-binding cassette, sub-family A (ABC1), member 1                                                                                                  | ABCA1     |
| Dr.7368.1.A1_at   | 2.54 | BC002601     | nuclear factor of kappa light polypeptide gene enhancer in B-cells inhibitor, alpha                                                                  | IKBA      |
| Dr.737.1.A1_at    | 1.65 | BC004250     | jun B proto-oncogene                                                                                                                                 | JUNB      |
| Dr.765.1.A1_at    | 0.43 | NM_000182    | hydroxyacyl-Coenzyme A dehydrogenase/3-ketoacyl-Coenzyme A thiolase/enoyl-Coenzyme A hydratase (trifunctional protein), alpha subunit                | HADHA     |
| Dr.7722.1.A1_at   | 5.53 | K02765       | complement component 3                                                                                                                               | C3        |

|                   |      |           |                                                                                          |         |
|-------------------|------|-----------|------------------------------------------------------------------------------------------|---------|
| Dr.7853.1.A1_at   | 0.60 | AB002323  | dynein, cytoplasmic, heavy polypeptide 1                                                 | DNCH1   |
| Dr.7977.1.S1_at   | 1.59 | NM_000581 | glutathione peroxidase 1                                                                 | GPX1    |
|                   |      | X53463    | glutathione peroxidase 2 (gastrointestinal)                                              | GPX2    |
| Dr.8000.1.S1_at   | 3.29 | NM_000581 | glutathione peroxidase 1                                                                 | GPX1    |
|                   |      | X53463    | glutathione peroxidase 2 (gastrointestinal)                                              | GPX2    |
| Dr.8014.1.S1_at   | 1.57 | X61123    | B-cell translocation gene 1, anti-proliferative                                          | BTG1    |
| Dr.8090.1.A1_at   | 2.86 | BC003175  | N-myc downstream regulated gene 1                                                        | NDRG1   |
| Dr.8097.1.S1_at   | 0.63 | NM_000539 | rhodopsin                                                                                | RHO     |
| Dr.8102.1.S1_at   | 0.55 | NM_000539 | rhodopsin                                                                                | RHO     |
| Dr.8109.1.S1_at   | 2.17 | AK223305  | lymphocyte cytosolic protein 1 (L-plastin)                                               | LCP1    |
| Dr.8143.1.S1_at   | 0.45 | NM_000134 | intestinal fatty acid binding protein 2                                                  | FABP2   |
| Dr.8153.1.S1_at   | 0.46 | BC000671  | claudin 4                                                                                | CLDN4   |
| Dr.827.1.A1_at    | 2.08 | AF201077  | NADH dehydrogenase (ubiquinone) 1 alpha subcomplex, 4, 9kDa                              | NDUFA4  |
| Dr.845.1.A1_at    | 2.23 | J00128    | fibrinogen, A alpha polypeptide                                                          | FGA     |
| Dr.8587.1.A1_at   | 1.90 | NM_000596 | insulin-like growth factor binding protein 1                                             | IGFBP1  |
| Dr.8587.1.A2_at   | 1.86 | NM_000596 | insulin-like growth factor binding protein 1                                             | IGFBP1  |
| Dr.8591.1.A1_at   | 9.04 | NM_000613 | hemopexin                                                                                | HPX     |
| Dr.8654.2.A1_a_at | 0.66 | NM_001788 | septin 7                                                                                 | SEPT7   |
| Dr.8723.1.S1_at   | 2.29 | BC003377  | thioredoxin                                                                              | TXN     |
| Dr.9288.1.S1_at   | 1.54 | NM_000612 | insulin-like growth factor 2 (somatomedin A)                                             | IGF2    |
| Dr.9448.1.A1_at   | 0.24 | NM_003597 | Kruppel-like factor 11                                                                   | KLF11   |
| Dr.9457.1.A1_at   | 2.85 | AK025273  | egl nine homolog 3 (C. elegans)                                                          | EGLN3   |
| Dr.9478.1.S1_at   | 2.15 | BC023019  | cytochrome P450, family 1, subfamily A, polypeptide 1                                    | CYP1A1  |
| Dr.9478.3.S1_a_at | 8.01 | NM_000250 | myeloperoxidase                                                                          | MPO     |
|                   |      | X14346    | eosinophil peroxidase                                                                    | EPX     |
| Dr.9492.1.A1_at   | 1.54 | BC016836  | sulfide quinone reductase-like (yeast)                                                   | SQRDL   |
| Dr.9515.1.A1_at   | 1.96 | AF495470  | coronin, actin binding protein, 1A                                                       | CORO1A  |
| Dr.956.1.S1_at    | 1.66 | NM_001863 | cytochrome c oxidase subunit VIb                                                         | COX6B1  |
| Dr.96.1.A1_at     | 1.53 | BC063851  | Complement component 7                                                                   | C7      |
| Dr.9617.1.A1_at   | 2.09 | AF159854  | suppressor of cytokine signaling 3                                                       | SOCS3   |
| Dr.9665.1.S1_at   | 1.59 | NM_001665 | ras homolog gene family, member G                                                        | RHOG    |
| Dr.967.1.S1_at    | 7.17 | BC006093  | matrix metalloproteinase 9                                                               | MMP9    |
| Dr.9876.1.S1_at   | 0.47 | BC008663  | guanine nucleotide binding protein (G protein), gamma transducing activity polypeptide 2 | GNGT2   |
| Dr.9890.1.A1_at   | 1.54 | --        | --                                                                                       | --      |
| DrAffx.1.32.S1_at | 2.08 | BT007245  | Transforming growth factor, beta 1 (Camurati-Engelmann disease)                          | TGFB1   |
| DrAffx.2.58.A1_at | 1.83 | NM_000782 | cytochrome P450, family 24, subfamily A, polypeptide 1                                   | CYP24A1 |

<sup>a</sup> Affymetrix probe set IDs representing zebrafish transcripts differentially expressed in CONVD versus GF zebrafish larvae at 6dpf.

<sup>b</sup> Fold difference of transcript level in 6dpf zebrafish larvae is shown as CONVD/GF.

<sup>c</sup> Homologous human transcripts identified using existing databases (<http://zblast1.danio.tchlab.org/zgMap/> and {Stuckenholz, 2009}) as well as manual annotation. If a probe set represents a zebrafish transcript with multiple human homologs, those homologous human genes are listed separately. Only the top human homolog for each probe set was included in the IPA functional categorization.
