# Supplementary material
Source: PubMed Central journal article supplement (PMC3164861)
Supplement: NIHMS287381-supplement-04.pdf [file NIHMS287381-supplement-04.pdf]

**Table S3: Biological functions annotated by IPA and changed in 6dpf CONVD compared to GF zebrafish larvae**

| Category                              | Function                    | Function Annotation                             | p-value                       | Molecules <sup>a</sup>                                                                               |                                                                                                                                                      |                                                                                                                                                      |
|---------------------------------------|-----------------------------|-------------------------------------------------|-------------------------------|------------------------------------------------------------------------------------------------------|------------------------------------------------------------------------------------------------------------------------------------------------------|------------------------------------------------------------------------------------------------------------------------------------------------------|
| Lipid Metabolism                      | oxidation                   | oxidation of fatty acid                         | 1.63E-12                      | ACADM, C3, CPT1B, DECR1, ETFDH, FABP1, FABP2, HADHA, HADHB, LPIN1, LPL, MAPK14, PTGS2, TGFB1         |                                                                                                                                                      |                                                                                                                                                      |
|                                       |                             | oxidation of lipid                              | 5.42E-12                      | ACADM, C3, CPT1B, CYP1A1, DECR1, ETFDH, FABP1, FABP2, HADHA, HADHB, LPIN1, LPL, MAPK14, PTGS2, TGFB1 |                                                                                                                                                      |                                                                                                                                                      |
|                                       | beta-oxidation              | beta-oxidation of fatty acid                    | 7.82E-10                      | ACADM, CPT1B, DECR1, ETFDH, FABP1, FABP2, HADHA, HADHB, TGFB1                                        |                                                                                                                                                      |                                                                                                                                                      |
|                                       | quantity                    | quantity of lipid                               | quantity of lipid             | 1.73E-09                                                                                             | ABCA1, AGT, ANGPTL4, ARF1, C3, CEBPB, CYP24A1, FABP1, FABP2, GCG, GPX1, GRP, IGF2, INPP5K, INSIG1, LPIN1, LPL, MPO, PLG, PPP1R3C, PTGS2, RBP2, TGFB1 |                                                                                                                                                      |
|                                       |                             |                                                 | quantity of fatty acid        | 6.91E-08                                                                                             | AGT, ANGPTL4, C3, CEBPB, FABP1, GPX1, IGF2, LPIN1, LPL, PPP1R3C, PTGS2, TGFB1                                                                        |                                                                                                                                                      |
|                                       |                             | quantity of acylglycerol                        | 3.13E-05                      | AGT, ANGPTL4, CEBPB, FABP1, GRP, LPIN1, LPL, MPO, PPP1R3C                                            |                                                                                                                                                      |                                                                                                                                                      |
|                                       |                             | quantity of steroid                             | 3.45E-05                      | ABCA1, AGT, CYP24A1, FABP1, GCG, IGF2, INSIG1, LPL, MPO, PLG, PTGS2                                  |                                                                                                                                                      |                                                                                                                                                      |
|                                       |                             | quantity of triacylglycerol                     | 5.15E-05                      | AGT, ANGPTL4, CEBPB, FABP1, LPIN1, LPL, MPO, PPP1R3C                                                 |                                                                                                                                                      |                                                                                                                                                      |
|                                       |                             | quantity of cholesterol                         | 2.42E-04                      | ABCA1, AGT, FABP1, GCG, INSIG1, LPL, MPO                                                             |                                                                                                                                                      |                                                                                                                                                      |
|                                       |                             | quantity of prostaglandin E2                    | 3.75E-04                      | AGT, GPX1, IGF2, PTGS2                                                                               |                                                                                                                                                      |                                                                                                                                                      |
|                                       |                             | quantity of eicosanoid                          | 6.71E-04                      | AGT, GPX1, IGF2, PTGS2, TGFB1                                                                        |                                                                                                                                                      |                                                                                                                                                      |
|                                       |                             | modification                                    | modification of lipid         | modification of lipid                                                                                | 4.16E-09                                                                                                                                             | ACADM, C3, CPT1B, CYP1A1, DECR1, ETFDH, FABP1, FABP2, GPX1, HADHA, HADHB, HPX, LPIN1, LPL, MAPK14, PTGS2, SULT2B1, TGFB1                             |
|                                       |                             |                                                 |                               | metabolism                                                                                           | metabolism of lipid                                                                                                                                  | 1.26E-07                                                                                                                                             |
|                                       | metabolism                  | metabolism of fatty acid                        | metabolism of fatty acid      | 7.91E-05                                                                                             | ACSS1, AGT, CEBPB, CYP1A1, FABP2, LPL, NCF1, PLA2G15, PTGS2                                                                                          |                                                                                                                                                      |
|                                       |                             |                                                 | synthesis                     | synthesis of lipid                                                                                   | 1.17E-06                                                                                                                                             | ACSS1, AGT, ARF1, ATP1A1, C3, CEBPB, CYP1A1, CYP24A1, DECR1, FABP1, GCG, IGF2, INSIG1, LPL, PTGS2, SERPINA1                                          |
|                                       | formation                   | synthesis of fatty acid                         | synthesis of fatty acid       | 4.17E-05                                                                                             | ACSS1, AGT, CEBPB, DECR1, GCG, IGF2, LPL, PTGS2                                                                                                      |                                                                                                                                                      |
|                                       |                             |                                                 | synthesis of prostaglandin E2 | 4.18E-04                                                                                             | AGT, CEBPB, IGF2, PTGS2                                                                                                                              |                                                                                                                                                      |
|                                       |                             | formation of fatty acid                         | 1.05E-05                      | ABCA1, AGT, NFKBIA, PTGS2, TGFB1                                                                     |                                                                                                                                                      |                                                                                                                                                      |
|                                       |                             | formation of 12(S)-hydroxyeicosatetraenoic acid | 9.12E-05                      | AGT, NFKBIA                                                                                          |                                                                                                                                                      |                                                                                                                                                      |
|                                       |                             | formation of eicosanoid                         | 1.03E-04                      | AGT, NFKBIA, PTGS2, TGFB1                                                                            |                                                                                                                                                      |                                                                                                                                                      |
|                                       | mass production             | mass of fat                                     | formation of lipid            | 1.86E-04                                                                                             | ABCA1, AGT, NFKBIA, PTGS2, SOCS3, TGFB1                                                                                                              |                                                                                                                                                      |
|                                       |                             |                                                 | mass of fat                   | 7.40E-05                                                                                             | AGT, IGF2, MC4R, TGFB1                                                                                                                               |                                                                                                                                                      |
|                                       |                             | production of epoprostenol                      | production of epoprostenol    | 1.34E-04                                                                                             | AGT, PTGS2, TGFB1                                                                                                                                    |                                                                                                                                                      |
|                                       |                             |                                                 | production of lipid           | 1.63E-04                                                                                             | AGT, C3, CYP1A1, GRP, HBB, IGF2, INSIG1, PLG, PTGS2, TGFB1                                                                                           |                                                                                                                                                      |
|                                       | release                     | release of lipid                                | 1.97E-04                      | ABCA1, AGT, C3, CEBPB, GRP, MAPK14, PLG, PTGS2                                                       |                                                                                                                                                      |                                                                                                                                                      |
|                                       | export                      | export of phosphatidic acid                     | 2.72E-04                      | ABCA1, FABP1                                                                                         |                                                                                                                                                      |                                                                                                                                                      |
|                                       | metabolic process           | metabolic process of acylglycerol               | 2.91E-04                      | FABP1, GPX1, INSIG1, LPL, PTGS2                                                                      |                                                                                                                                                      |                                                                                                                                                      |
|                                       | uptake                      | uptake of lipid                                 | 3.37E-04                      | ABCA1, C3, FABP6, LPL, MC4R, THBS1                                                                   |                                                                                                                                                      |                                                                                                                                                      |
|                                       | transport                   | transport of long chain fatty acid              | 3.60E-04                      | CPT1B, FABP1, FABP2                                                                                  |                                                                                                                                                      |                                                                                                                                                      |
|                                       | accumulation                | accumulation of lipid                           | 4.56E-04                      | ABCA1, CEBPB, CEPBD, FABP1, HADHA, INSIG1, LPIN1, LPL                                                |                                                                                                                                                      |                                                                                                                                                      |
| concentration regulation biosynthesis | concentration               | accumulation of triacylglycerol                 | 6.82E-04                      | CEBPB, INSIG1, LPIN1, LPL                                                                            |                                                                                                                                                      |                                                                                                                                                      |
|                                       |                             | concentration of cholesterol                    | 5.31E-04                      | ABCA1, AGT, PTGS2                                                                                    |                                                                                                                                                      |                                                                                                                                                      |
|                                       | regulation                  | regulation of lipopolysaccharide                | 5.40E-04                      | SOCS1, SOCS3                                                                                         |                                                                                                                                                      |                                                                                                                                                      |
|                                       | biosynthesis                | biosynthesis of fatty acid                      | 5.53E-04                      | ACSS1, AGT, CEBPB, LPL, PTGS2                                                                        |                                                                                                                                                      |                                                                                                                                                      |
|                                       |                             | biosynthesis of lipid                           | 6.26E-04                      | ACSS1, AGT, ATP1A1, CEBPB, CYP1A1, FABP1, INSIG1, LPL, PTGS2                                         |                                                                                                                                                      |                                                                                                                                                      |
|                                       | conversion                  | conversion of lipid                             | 6.59E-04                      | CPT1B, CYP1A1, FABP1, GPX1, HPX, PTGS2                                                               |                                                                                                                                                      |                                                                                                                                                      |
|                                       | Small Molecule Biochemistry | oxidation                                       | oxidation of fatty acid       | 1.63E-12                                                                                             | ACADM, C3, CPT1B, DECR1, ETFDH, FABP1, FABP2, HADHA, HADHB, LPIN1, LPL, MAPK14, PTGS2, TGFB1                                                         |                                                                                                                                                      |
|                                       |                             |                                                 | oxidation of lipid            | 5.42E-12                                                                                             | ACADM, C3, CPT1B, CYP1A1, DECR1, ETFDH, FABP1, FABP2, HADHA, HADHB, LPIN1, LPL, MAPK14, PTGS2, TGFB1                                                 |                                                                                                                                                      |
|                                       |                             | beta-oxidation                                  | beta-oxidation of fatty acid  | 7.82E-10                                                                                             | ACADM, CPT1B, DECR1, ETFDH, FABP1, FABP2, HADHA, HADHB, TGFB1                                                                                        |                                                                                                                                                      |
|                                       |                             | quantity                                        | quantity of lipid             | quantity of lipid                                                                                    | 1.73E-09                                                                                                                                             | ABCA1, AGT, ANGPTL4, ARF1, C3, CEBPB, CYP24A1, FABP1, FABP2, GCG, GPX1, GRP, IGF2, INPP5K, INSIG1, LPIN1, LPL, MPO, PLG, PPP1R3C, PTGS2, RBP2, TGFB1 |
| quantity of fatty acid                |                             |                                                 |                               | 6.91E-08                                                                                             | AGT, ANGPTL4, C3, CEBPB, FABP1, GPX1, IGF2, LPIN1, LPL, PPP1R3C, PTGS2, TGFB1                                                                        |                                                                                                                                                      |
| quantity of D-glucose                 |                             |                                                 | 1.77E-07                      | C3, GCG, GPX1, IGF2, IGFBP1, LPL, MAPK14, MPO, PPP1R3C, SOCS1                                        |                                                                                                                                                      |                                                                                                                                                      |
| quantity of acylglycerol              |                             |                                                 | 3.13E-05                      | AGT, ANGPTL4, CEBPB, FABP1, GRP, LPIN1, LPL, MPO, PPP1R3C                                            |                                                                                                                                                      |                                                                                                                                                      |
| quantity of steroid                   |                             |                                                 | 3.45E-05                      | ABCA1, AGT, CYP24A1, FABP1, GCG, IGF2, INSIG1, LPL, MPO, PLG, PTGS2                                  |                                                                                                                                                      |                                                                                                                                                      |
| quantity of triacylglycerol           |                             |                                                 | 5.15E-05                      | AGT, ANGPTL4, CEBPB, FABP1, LPIN1, LPL, MPO, PPP1R3C                                                 |                                                                                                                                                      |                                                                                                                                                      |

|                   |                                                 |          |                                                                                                                                                                                |
|-------------------|-------------------------------------------------|----------|--------------------------------------------------------------------------------------------------------------------------------------------------------------------------------|
|                   | quantity of cholesterol                         | 2.42E-04 | ABCA1, AGT, FABP1, GCG, INSIG1, LPL, MPO                                                                                                                                       |
|                   | quantity of prostaglandin E2                    | 3.75E-04 | AGT, GPX1, IGF2, PTGS2                                                                                                                                                         |
|                   | quantity of eicosanoid                          | 6.71E-04 | AGT, GPX1, IGF2, PTGS2, TGFB1                                                                                                                                                  |
| modification      | modification of lipid                           | 4.16E-09 | ACADM, C3, CPT1B, CYP1A1, DECR1, ETFDH, FABP1, FABP2, GPX1, HADHA, HADHB, HPX, LPIN1, LPL, MAPK14, PTGS2, SULT2B1, TGFB1                                                       |
|                   | modification of hydrogen peroxide               | 5.41E-06 | MPO, PRDX1, PTGS2, TXN                                                                                                                                                         |
| metabolism        | modification of D-glucose                       | 5.13E-04 | C3, GCG, IGF2, LPL                                                                                                                                                             |
|                   | metabolism of lipid                             | 1.26E-07 | ABCA1, ACSS1, AGT, ANGPTL4, ARF1, ATP1A1, CEBPB, CYP1A1, CYP24A1, FABP1, FABP2, FABP6, GCG, GPX1, INSIG1, LPIN1, LPL, NCF1, PLA2G15, PTGS2, RBP2, SULT2B1                      |
|                   | metabolism of fatty acid                        | 7.91E-05 | ACSS1, AGT, CEBPB, CYP1A1, FABP2, LPL, NCF1, PLA2G15, PTGS2                                                                                                                    |
| synthesis         | synthesis of lipid                              | 1.17E-06 | ACSS1, AGT, ARF1, ATP1A1, C3, CEBPB, CYP1A1, CYP24A1, DECR1, FABP1, GCG, IGF2, INSIG1, LPL, PTGS2, SERPINA1                                                                    |
|                   | synthesis of D-glucose                          | 1.69E-05 | CEBPB, GCG, PPP1R3C                                                                                                                                                            |
|                   | synthesis of fatty acid                         | 4.17E-05 | ACSS1, AGT, CEBPB, DECR1, GCG, IGF2, LPL, PTGS2                                                                                                                                |
| production        | synthesis of prostaglandin E2                   | 4.18E-04 | AGT, CEBPB, IGF2, PTGS2                                                                                                                                                        |
|                   | production of nitric oxide                      | 7.53E-06 | AGT, CEBPB, HBEGF, IGF2, MST1, NCF1, SOCS1, SOCS3, TGFB1                                                                                                                       |
|                   | production of epoprostenol                      | 1.34E-04 | AGT, PTGS2, TGFB1                                                                                                                                                              |
| formation         | production of lipid                             | 1.63E-04 | AGT, C3, CYP1A1, GRP, HBB, IGF2, INSIG1, PLG, PTGS2, TGFB1                                                                                                                     |
|                   | formation of fatty acid                         | 1.05E-05 | ABCA1, AGT, NFKBIA, PTGS2, TGFB1                                                                                                                                               |
|                   | formation of 12(S)-hydroxyeicosatetraenoic acid | 9.12E-05 | AGT, NFKBIA                                                                                                                                                                    |
|                   | formation of eicosanoid                         | 1.03E-04 | AGT, NFKBIA, PTGS2, TGFB1                                                                                                                                                      |
|                   | formation of lipid                              | 1.86E-04 | ABCA1, AGT, NFKBIA, PTGS2, SOCS3, TGFB1                                                                                                                                        |
| reduction         | reduction of hydrogen peroxide                  | 6.94E-05 | PRDX1, PTGS2, TXN                                                                                                                                                              |
| mass              | mass of fat                                     | 7.40E-05 | AGT, IGF2, MC4R, TGFB1                                                                                                                                                         |
| release           | release of Ca <sup>2+</sup>                     | 1.25E-04 | AGT, FGA, FGB, FGG, GCG, TGFB1                                                                                                                                                 |
|                   | release of lipid                                | 1.97E-04 | ABCA1, AGT, C3, CEBPB, GRP, MAPK14, PLG, PTGS2                                                                                                                                 |
| incorporation     | incorporation of thymidine                      | 1.34E-04 | AGT, HBEGF, IGF2, PTGS2, TF, TGFB1                                                                                                                                             |
|                   | incorporation of D-glucose                      | 1.78E-04 | GCG, IGF2, PPP1R3C                                                                                                                                                             |
| export            | export of phosphatidic acid                     | 2.72E-04 | ABCA1, FABP1                                                                                                                                                                   |
| metabolic process | metabolic process of acylglycerol               | 2.91E-04 | FABP1, GPX1, INSIG1, LPL, PTGS2                                                                                                                                                |
| uptake            | uptake of lipid                                 | 3.37E-04 | ABCA1, C3, FABP6, LPL, MC4R, THBS1                                                                                                                                             |
| transport         | transport of long chain fatty acid              | 3.60E-04 | CPT1B, FABP1, FABP2                                                                                                                                                            |
| accumulation      | accumulation of lipid                           | 4.56E-04 | ABCA1, CEBPB, CEPD, FABP1, HADHA, INSIG1, LPIN1, LPL                                                                                                                           |
|                   | accumulation of triacylglycerol                 | 6.82E-04 | CEBPB, INSIG1, LPIN1, LPL                                                                                                                                                      |
| concentration     | concentration of cholesterol                    | 5.31E-04 | ABCA1, AGT, PTGS2                                                                                                                                                              |
| regulation        | regulation of lipopolysaccharide                | 5.40E-04 | SOCS1, SOCS3                                                                                                                                                                   |
| biosynthesis      | biosynthesis of fatty acid                      | 5.53E-04 | ACSS1, AGT, CEBPB, LPL, PTGS2                                                                                                                                                  |
|                   | biosynthesis of lipid                           | 6.26E-04 | ACSS1, AGT, ATP1A1, CEBPB, CYP1A1, FABP1, INSIG1, LPL, PTGS2                                                                                                                   |
| conversion        | conversion of lipid                             | 6.59E-04 | CPT1B, CYP1A1, FABP1, GPX1, HPX, PTGS2                                                                                                                                         |
| cell movement     | cell movement of phagocytes                     | 3.49E-11 | AGT, C3, C6, C4B, CFB, CORO1A, CRP, MAP3K5, MAPK14, MC4R, NFKBIA, PLG, PTGS2, SAA1, SERPINA1, SOCS1, SOCS3, TGFB1                                                              |
|                   | cell movement of leukocytes                     | 5.47E-11 | AGT, C3, C6, C4B, CFB, CORO1A, CRP, FGB, MAP3K5, MAPK14, MC4R, MMP9, MPO, NFKBIA, PLG, PRDX1, PTGS2, SAA1, SERPINA1, SOCS1, SOCS3, TGFB1, THBS1, TXN                           |
|                   | cell movement of eukaryotic cells               | 2.43E-08 | AGT, C3, C6, C4B, CFB, CLDN4, CORO1A, CRP, FGB, LCP1, MAP3K5, MAPK14, MC4R, MMP9, MPO, MST1, NFKBIA, PLG, PRDX1, PTGS2, SAA1, SERPINA1, SOCS1, SOCS3, TGFB1, THBS1, TXN        |
|                   | cell movement of neutrophils                    | 3.66E-08 | AGT, C3, C4B, CFB, CORO1A, CRP, MAPK14, NFKBIA, PLG, PTGS2, SERPINA1, SOCS3, TGFB1                                                                                             |
|                   | cell movement                                   | 1.50E-07 | AGT, C3, C6, C4B, CFB, CLDN4, CORO1A, CRP, FGB, HBEGF, LCP1, MAP3K5, MAPK14, MC4R, MMP9, MPO, MST1, NFKBIA, PLG, PRDX1, PTGS2, SAA1, SERPINA1, SOCS1, SOCS3, TGFB1, THBS1, TXN |
|                   | cell movement of macrophages                    | 7.27E-07 | AGT, C3, C6, MAP3K5, MC4R, PTGS2, SAA1, SOCS1, TGFB1                                                                                                                           |
|                   | cell movement of cell lines                     | 1.67E-04 | AGT, C3, CLDN4, LCP1, MST1, PLG, PTGS2, SERPINA1, SOCS1, TGFB1, THBS1, TXN                                                                                                     |
|                   | cell movement of lymphocytes                    | 1.77E-04 | AGT, C3, C6, MMP9, SAA1, SOCS1, SOCS3, TGFB1, THBS1                                                                                                                            |
|                   | cell movement of mononuclear leukocytes         | 1.97E-04 | AGT, C3, C6, MMP9, PLG, SAA1, SOCS1, SOCS3, TGFB1, THBS1                                                                                                                       |
| invasion          | cell movement of T lymphocytes                  | 3.34E-04 | AGT, C3, C6, SOCS1, SOCS3, TGFB1, THBS1                                                                                                                                        |
|                   | invasion of cell lines                          | 3.63E-08 | AGT, CLDN4, GRN, GRP, HBEGF, IGF2, JUNB, LCP1, MMP9, MMP13, MST1, NDRG1, PLG, PTGS2, RHOG, SERPINA1, TGFB1, TIMP2                                                              |
|                   | invasion of eukaryotic cells                    | 6.45E-08 | AGT, CLDN4, CTSL1, GRN, GRP, HBEGF, IGF2, JUNB, LCP1, MMP9, MMP13, MST1, NDRG1, PLG, PTGS2, RHOG, SERPINA1, TGFB1, TIMP2                                                       |

|               |                                          |          |                                                                                                                                                                                                             |
|---------------|------------------------------------------|----------|-------------------------------------------------------------------------------------------------------------------------------------------------------------------------------------------------------------|
|               | invasion of tumor cell lines             | 1.23E-07 | AGT, CLDN4, GRN, GRP, HBEGF, IGF2, JUNB, LCP1, MMP9, MST1, NDRG1, PLG, PTGS2, SERPINA1, TGFB1, TIMP2                                                                                                        |
|               | invasion of colon cancer cell lines      | 4.28E-05 | AGT, GRP, IGF2, PLG, PTGS2                                                                                                                                                                                  |
|               | invasion of pancreatic cancer cell lines | 7.40E-05 | CLDN4, MMP9, TGFB1, TIMP2                                                                                                                                                                                   |
|               | invasion of melanoma cells               | 9.85E-05 | CTSL1, MMP9, TGFB1                                                                                                                                                                                          |
|               | invasion of carcinoma cell lines         | 4.18E-04 | GRN, GRP, JUNB, TGFB1                                                                                                                                                                                       |
| migration     | invasion of epithelial cell lines        | 6.33E-04 | MMP9, PTGS2, TGFB1                                                                                                                                                                                          |
|               | migration of endothelial cells           | 9.56E-08 | AGT, ANGPTL4, CRP, GRN, IGF2, MAPK14, MMP13, PLG, PTGS2, TGFB1, THBS1, TIMP2                                                                                                                                |
|               | migration of eukaryotic cells            | 1.93E-07 | AGT, ANGPTL4, C3, C6, CLDN4, CORO1A, CRP, DMBT1, FGA, GRN, GRP, HBEGF, IGF2, IGFBP1, MAPK14, MMP9, MMP13, MST1, NCF1, NFKBIA, PLG, PTGS2, RHO, SAA1, SERPINA1, SOCS1, SOCS3, TGFB1, THBS1, TIMP2, TXN       |
|               | migration of cell lines                  | 2.01E-07 | AGT, C3, CLDN4, FGA, GRN, GRP, HBEGF, IGF2, IGFBP1, MAPK14, MMP9, MST1, PLG, PTGS2, RHO, SAA1, SOCS3, TGFB1, THBS1, TIMP2                                                                                   |
|               | migration of cells                       | 2.91E-07 | AGT, ANGPTL4, C3, C6, CLDN4, CORO1A, CRP, DMBT1, FGA, GRN, GRP, HBEGF, IGF2, IGFBP1, MAPK14, MMP9, MMP13, MST1, MUC2, NCF1, NFKBIA, PLG, PTGS2, RHO, SAA1, SERPINA1, SOCS1, SOCS3, TGFB1, THBS1, TIMP2, TXN |
|               | migration of tumor cell lines            | 3.16E-07 | AGT, CLDN4, FGA, GRN, GRP, IGF2, IGFBP1, MAPK14, MMP9, MST1, PTGS2, RHO, SOCS3, TGFB1, THBS1, TIMP2                                                                                                         |
|               | migration of normal cells                | 4.53E-07 | AGT, ANGPTL4, C3, C6, CORO1A, CRP, DMBT1, GRN, HBEGF, IGF2, MAPK14, MMP9, MMP13, MST1, NCF1, NFKBIA, PLG, PTGS2, SAA1, SERPINA1, SOCS1, SOCS3, TGFB1, THBS1, TIMP2, TXN                                     |
|               | migration of leukocytes                  | 1.37E-06 | AGT, C3, C6, CORO1A, DMBT1, MAPK14, MMP9, MST1, NFKBIA, PLG, SAA1, SERPINA1, SOCS1, SOCS3, TGFB1, THBS1, TIMP2, TXN                                                                                         |
|               | migration of dermal fibroblasts          | 2.93E-05 | AGT, HBEGF, TGFB1                                                                                                                                                                                           |
|               | migration of connective tissue cells     | 3.50E-05 | AGT, HBEGF, MAPK14, NCF1, TGFB1, THBS1, TIMP2                                                                                                                                                               |
|               | migration of monocytes                   | 4.68E-05 | AGT, MAPK14, MMP9, PLG, TGFB1, TIMP2                                                                                                                                                                        |
|               | migration of phagocytes                  | 8.44E-05 | DMBT1, MMP9, MST1, PLG, SAA1, TGFB1, TXN                                                                                                                                                                    |
|               | migration of mononuclear leukocytes      | 1.00E-04 | AGT, C3, C6, MAPK14, MMP9, PLG, SOCS1, SOCS3, TGFB1, THBS1, TIMP2                                                                                                                                           |
|               | migration of epithelial cell lines       | 1.13E-04 | C3, FGA, PTGS2, SAA1, TGFB1                                                                                                                                                                                 |
|               | migration of smooth muscle cells         | 1.34E-04 | AGT, HBEGF, MMP9, PLG, PTGS2, THBS1                                                                                                                                                                         |
|               | migration of fibroblasts                 | 1.64E-04 | AGT, HBEGF, MAPK14, TGFB1, THBS1, TIMP2                                                                                                                                                                     |
|               | T cell migration                         | 3.16E-04 | AGT, C3, C6, SOCS1, SOCS3, TGFB1, THBS1, TIMP2                                                                                                                                                              |
|               | migration of lymphatic system cells      | 3.49E-04 | C3, IGF2, MMP9, PLG, SAA1, TGFB1, TXN                                                                                                                                                                       |
|               | migration of breast cancer cell lines    | 4.65E-04 | IGF2, IGFBP1, MAPK14, MMP9, TGFB1, TIMP2                                                                                                                                                                    |
|               | migration of epithelial cells            | 5.53E-04 | AGT, HBEGF, MMP9, PLG, TGFB1                                                                                                                                                                                |
| infiltration  | migration of colon cancer cell lines     | 6.82E-04 | GRP, IGF2, MST1, TGFB1                                                                                                                                                                                      |
|               | infiltration by macrophages              | 1.45E-07 | AGT, C3, C6, MAP3K5, MC4R, PTGS2, SOCS1, TGFB1                                                                                                                                                              |
|               | infiltration by neutrophils              | 6.70E-07 | AGT, C3, C4B, CFB, MAPK14, NFKBIA, PLG, PTGS2, SOCS3                                                                                                                                                        |
|               | infiltration of cells                    | 2.88E-06 | AGT, C3, C6, FGB, MAPK14, MMP9, MPO, PLG, SOCS1, SOCS3, TGFB1                                                                                                                                               |
|               | infiltration of leukocytes               | 1.02E-04 | AGT, C3, C6, FGB, MMP9, MPO, SOCS1, TGFB1                                                                                                                                                                   |
|               | infiltration by T lymphocytes            | 2.11E-04 | AGT, C3, C6, SOCS1, TGFB1                                                                                                                                                                                   |
| chemotaxis    | chemotaxis of cells                      | 1.56E-05 | AGT, C3, CORO1A, HBEGF, MAPK14, MMP9, PLG, PTGS2, SAA1, SERPINA1, SOCS1, SOCS3, TGFB1, THBS1, TXN                                                                                                           |
|               | chemotaxis of eukaryotic cells           | 3.02E-05 | AGT, C3, CORO1A, MAPK14, MMP9, PLG, PTGS2, SAA1, SERPINA1, SOCS1, SOCS3, TGFB1, THBS1, TXN                                                                                                                  |
|               | chemotaxis of leukocytes                 | 4.42E-05 | C3, CORO1A, MAPK14, MMP9, PLG, SAA1, SERPINA1, SOCS3, TGFB1, THBS1, TXN                                                                                                                                     |
|               | chemotaxis of normal cells               | 6.29E-05 | AGT, C3, CORO1A, MAPK14, MMP9, PLG, SAA1, SERPINA1, SOCS3, TGFB1, THBS1, TXN                                                                                                                                |
|               | chemotaxis of cell lines                 | 3.67E-04 | AGT, C3, PLG, PTGS2, SOCS1, TGFB1, THBS1, TXN                                                                                                                                                               |
| movement      | movement of liver cells                  | 1.78E-04 | AGT, NCF1, TGFB1                                                                                                                                                                                            |
|               | influx                                   | 4.18E-04 | MARCO, MMP9, MPO, SERPINA1                                                                                                                                                                                  |
| cell movement | influx of leukocytes                     | 3.49E-11 | AGT, C3, C6, C4B, CFB, CORO1A, CRP, MAP3K5, MAPK14, MC4R, NFKBIA, PLG, PTGS2, SAA1, SERPINA1, SOCS1, SOCS3, TGFB1                                                                                           |
|               | cell movement of phagocytes              | 3.49E-11 | AGT, C3, C6, C4B, CFB, CORO1A, CRP, MAP3K5, MAPK14, MC4R, MMP9, MPO, NFKBIA, PLG, PRDX1, PTGS2, SAA1, SERPINA1, SOCS1, SOCS3, TGFB1, THBS1, TXN                                                             |
|               | cell movement of leukocytes              | 5.47E-11 | AGT, C3, C6, C4B, CFB, CORO1A, CRP, FGB, MAP3K5, MAPK14, MC4R, MMP9, MPO, NFKBIA, PLG, PRDX1, PTGS2, SAA1, SERPINA1, SOCS1, SOCS3, TGFB1, THBS1, TXN                                                        |
|               | cell movement of neutrophils             | 3.66E-08 | AGT, C3, C4B, CFB, CORO1A, CRP, MAPK14, NFKBIA, PLG, PTGS2, SERPINA1, SOCS3, TGFB1                                                                                                                          |
|               | cell movement of macrophages             | 7.27E-07 | AGT, C3, C6, MAP3K5, MC4R, PTGS2, SAA1, SOCS1, TGFB1                                                                                                                                                        |
|               | cell movement of lymphocytes             | 1.77E-04 | AGT, C3, C6, MMP9, SAA1, SOCS1, SOCS3, TGFB1, THBS1                                                                                                                                                         |
|               | cell movement of mononuclear leukocytes  | 1.97E-04 | AGT, C3, C6, MMP9, PLG, SAA1, SOCS1, SOCS3, TGFB1, THBS1                                                                                                                                                    |
|               | cell movement of T lymphocytes           | 3.34E-04 | AGT, C3, C6, SOCS1, SOCS3, TGFB1, THBS1                                                                                                                                                                     |

Hematological System  
Development and Function

|                                         |                                                           |                                                |                                                                                                                     |                                                                                                                                                       |
|-----------------------------------------|-----------------------------------------------------------|------------------------------------------------|---------------------------------------------------------------------------------------------------------------------|-------------------------------------------------------------------------------------------------------------------------------------------------------|
| Immune Cell Trafficking                 | quantity                                                  | quantity of phagocytes                         | 6.52E-10                                                                                                            | ABCA1, AGT, C6, CFH, FABP1, HBEGF, MMP9, MMP13, NFKBIA, PLG, SOCS1, SOCS3, TF, TGFB1                                                                  |
|                                         |                                                           | quantity of blood cells                        | 1.58E-08                                                                                                            | ABCA1, AGT, C3, C6, CEBPB, CFH, FABP1, HBB, HBEGF, IGF2, IGFBP1, MAPK14, MMP9, MMP13, NFKBIA, PLG, PPP1R15A, SERPINA1, SOCS1, SOCS3, TF, TGFB1, THBS1 |
|                                         |                                                           | quantity of macrophages                        | 1.08E-06                                                                                                            | ABCA1, AGT, FABP1, HBEGF, MMP9, NFKBIA, PLG, SOCS1, TGFB1                                                                                             |
|                                         |                                                           | quantity of leukocytes                         | 5.23E-06                                                                                                            | ABCA1, AGT, C3, C6, CEBPB, CFH, FABP1, HBEGF, IGF2, MMP9, MMP13, NFKBIA, PLG, SERPINA1, SOCS1, SOCS3, TF, TGFB1                                       |
|                                         | infiltration                                              | quantity of neutrophils                        | 1.43E-04                                                                                                            | C6, CFH, MMP9, MMP13, SOCS3, TF                                                                                                                       |
|                                         |                                                           | quantity of granulocytes                       | 2.91E-04                                                                                                            | C6, CFH, MMP9, MMP13, SERPINA1, SOCS3, TF                                                                                                             |
|                                         |                                                           | infiltration by macrophages                    | 1.45E-07                                                                                                            | AGT, C3, C6, MAP3K5, MC4R, PTGS2, SOCS1, TGFB1                                                                                                        |
|                                         |                                                           | infiltration by neutrophils                    | 6.70E-07                                                                                                            | AGT, C3, C4B, CFB, MAPK14, NFKBIA, PLG, PTGS2, SOCS3                                                                                                  |
|                                         | accumulation                                              | infiltration of leukocytes                     | 1.02E-04                                                                                                            | AGT, C3, C6, FGB, MMP9, MPO, SOCS1, TGFB1                                                                                                             |
|                                         |                                                           | infiltration by T lymphocytes                  | 2.11E-04                                                                                                            | AGT, C3, C6, SOCS1, TGFB1                                                                                                                             |
|                                         |                                                           | accumulation of neutrophils                    | 2.50E-07                                                                                                            | AGT, C6, C7, C9, GRN, MMP9, TIMP2                                                                                                                     |
|                                         |                                                           | accumulation of granulocytes                   | 3.73E-07                                                                                                            | AGT, C6, C7, C9, GRN, MMP9, PLG, TIMP2                                                                                                                |
|                                         |                                                           | accumulation of phagocytes                     | 5.73E-07                                                                                                            | AGT, C6, C7, C9, GRN, MMP9, PLG, TIMP2                                                                                                                |
|                                         |                                                           | accumulation of blood cells                    | 7.55E-07                                                                                                            | AGT, C6, C7, C9, C4B, GRN, KRT18, MMP9, PLG, TGFB1, TIMP2                                                                                             |
|                                         | adhesion                                                  | accumulation of leukocytes                     | 3.97E-06                                                                                                            | AGT, C6, C7, C9, C4B, GRN, MMP9, PLG, TGFB1, TIMP2                                                                                                    |
|                                         |                                                           | adhesion of leukocytes                         | 2.47E-06                                                                                                            | AGT, C3, CORO1A, CRP, FGA, FGG, LCP1, MARCO, NFKBIA, TGFB1, THBS1, TXN                                                                                |
|                                         | activation                                                | activation of macrophages                      | 1.12E-05                                                                                                            | C6, CRP, MPO, PLG, PTGS2, SPON2, TGFB1, THBS1                                                                                                         |
|                                         | activation                                                | activation of phagocytes                       | 1.91E-05                                                                                                            | C3, C6, CRP, MPO, PLG, PTGS2, SPON2, TGFB1, THBS1                                                                                                     |
|                                         |                                                           | activation of leukocytes                       | 4.80E-04                                                                                                            | C3, C6, C4B, CORO1A, CRP, F5, MPO, NDRG1, PLG, PTGS2, SOCS1, SPON2, TGFB1, THBS1                                                                      |
|                                         | chemotaxis                                                | chemotaxis of leukocytes                       | 4.42E-05                                                                                                            | C3, CORO1A, MAPK14, MMP9, PLG, SAA1, SERPINA1, SOCS3, TGFB1, THBS1, TXN                                                                               |
|                                         | coagulation<br>influx<br>release<br>hematological process | coagulation of blood                           | 9.47E-05                                                                                                            | C3, C9, CRP, F5, FGA, PLG, THBS1                                                                                                                      |
|                                         |                                                           | influx of leukocytes                           | 4.18E-04                                                                                                            | MARCO, MMP9, MPO, SERPINA1                                                                                                                            |
|                                         |                                                           | release of dense granules                      | 5.40E-04                                                                                                            | FGA, FGG                                                                                                                                              |
|                                         |                                                           | hematological process                          | 5.69E-04                                                                                                            | C3, C9, CEBPB, CEBPD, CRP, F5, FGA, HBB, IGF2, JUNB, KLF11, MAPK14, MCL1, NFKBIA, PLG, PTGS2, SOCS1, SOCS3, TGFB1, THBS1                              |
|                                         | colony formation                                          | colony formation of erythroid progenitor cells | 7.46E-04                                                                                                            | MAPK14, SOCS1, TGFB1                                                                                                                                  |
|                                         | cell movement                                             | cell movement of phagocytes                    | 3.49E-11                                                                                                            | AGT, C3, C6, C4B, CFB, CORO1A, CRP, MAP3K5, MAPK14, MC4R, NFKBIA, PLG, PTGS2, SAA1, SERPINA1, SOCS1, SOCS3, TGFB1                                     |
|                                         |                                                           | cell movement of leukocytes                    | 5.47E-11                                                                                                            | AGT, C3, C6, C4B, CFB, CORO1A, CRP, FGB, MAP3K5, MAPK14, MC4R, MMP9, MPO, NFKBIA, PLG, PRDX1, PTGS2, SAA1, SERPINA1, SOCS1, SOCS3, TGFB1, THBS1, TXN  |
| cell movement of neutrophils            |                                                           | 3.66E-08                                       | AGT, C3, C4B, CFB, CORO1A, CRP, MAPK14, NFKBIA, PLG, PTGS2, SERPINA1, SOCS3, TGFB1                                  |                                                                                                                                                       |
| cell movement of macrophages            |                                                           | 7.27E-07                                       | AGT, C3, C6, MAP3K5, MC4R, PTGS2, SAA1, SOCS1, TGFB1                                                                |                                                                                                                                                       |
| cell movement of lymphocytes            |                                                           | 1.77E-04                                       | AGT, C3, C6, MMP9, SAA1, SOCS1, SOCS3, TGFB1, THBS1                                                                 |                                                                                                                                                       |
| cell movement of mononuclear leukocytes |                                                           | 1.97E-04                                       | AGT, C3, C6, MMP9, PLG, SAA1, SOCS1, SOCS3, TGFB1, THBS1                                                            |                                                                                                                                                       |
| infiltration                            |                                                           | cell movement of T lymphocytes                 | 3.34E-04                                                                                                            | AGT, C3, C6, SOCS1, SOCS3, TGFB1, THBS1                                                                                                               |
|                                         |                                                           | infiltration by macrophages                    | 1.45E-07                                                                                                            | AGT, C3, C6, MAP3K5, MC4R, PTGS2, SOCS1, TGFB1                                                                                                        |
|                                         |                                                           | infiltration by neutrophils                    | 6.70E-07                                                                                                            | AGT, C3, C4B, CFB, MAPK14, NFKBIA, PLG, PTGS2, SOCS3                                                                                                  |
| accumulation                            |                                                           | infiltration of leukocytes                     | 1.02E-04                                                                                                            | AGT, C3, C6, FGB, MMP9, MPO, SOCS1, TGFB1                                                                                                             |
|                                         |                                                           | infiltration by T lymphocytes                  | 2.11E-04                                                                                                            | AGT, C3, C6, SOCS1, TGFB1                                                                                                                             |
|                                         |                                                           | accumulation of neutrophils                    | 2.50E-07                                                                                                            | AGT, C6, C7, C9, GRN, MMP9, TIMP2                                                                                                                     |
|                                         |                                                           | accumulation of granulocytes                   | 3.73E-07                                                                                                            | AGT, C6, C7, C9, GRN, MMP9, PLG, TIMP2                                                                                                                |
|                                         | accumulation of phagocytes                                | 5.73E-07                                       | AGT, C6, C7, C9, GRN, MMP9, PLG, TIMP2                                                                              |                                                                                                                                                       |
| migration                               | accumulation of leukocytes                                | 3.97E-06                                       | AGT, C6, C7, C9, C4B, GRN, MMP9, PLG, TGFB1, TIMP2                                                                  |                                                                                                                                                       |
|                                         | migration of leukocytes                                   | 1.37E-06                                       | AGT, C3, C6, CORO1A, DMBT1, MAPK14, MMP9, MST1, NFKBIA, PLG, SAA1, SERPINA1, SOCS1, SOCS3, TGFB1, THBS1, TIMP2, TXN |                                                                                                                                                       |
| migration                               | migration of monocytes                                    | 4.68E-05                                       | AGT, MAPK14, MMP9, PLG, TGFB1, TIMP2                                                                                |                                                                                                                                                       |
|                                         | migration of phagocytes                                   | 8.44E-05                                       | DMBT1, MMP9, MST1, PLG, SAA1, TGFB1, TXN                                                                            |                                                                                                                                                       |
|                                         | migration of mononuclear leukocytes                       | 1.00E-04                                       | AGT, C3, C6, MAPK14, MMP9, PLG, SOCS1, SOCS3, TGFB1, THBS1, TIMP2                                                   |                                                                                                                                                       |
| adhesion                                | T cell migration                                          | 3.16E-04                                       | AGT, C3, C6, SOCS1, SOCS3, TGFB1, THBS1, TIMP2                                                                      |                                                                                                                                                       |
|                                         | adhesion of leukocytes                                    | 2.47E-06                                       | AGT, C3, CORO1A, CRP, FGA, FGG, LCP1, MARCO, NFKBIA, TGFB1, THBS1, TXN                                              |                                                                                                                                                       |
| activation                              | activation of macrophages                                 | 1.12E-05                                       | C6, CRP, MPO, PLG, PTGS2, SPON2, TGFB1, THBS1                                                                       |                                                                                                                                                       |
|                                         | activation of phagocytes                                  | 1.91E-05                                       | C3, C6, CRP, MPO, PLG, PTGS2, SPON2, TGFB1, THBS1                                                                   |                                                                                                                                                       |
|                                         | activation of leukocytes                                  | 4.80E-04                                       | C3, C6, C4B, CORO1A, CRP, F5, MPO, NDRG1, PLG, PTGS2, SOCS1, SPON2, TGFB1, THBS1                                    |                                                                                                                                                       |
| chemotaxis                              | chemotaxis of leukocytes                                  | 4.42E-05                                       | C3, CORO1A, MAPK14, MMP9, PLG, SAA1, SERPINA1, SOCS3, TGFB1, THBS1, TXN                                             |                                                                                                                                                       |

|                                                                          |                                                             |                                                      |                                                      |                                                                                                                                                                                                     |
|--------------------------------------------------------------------------|-------------------------------------------------------------|------------------------------------------------------|------------------------------------------------------|-----------------------------------------------------------------------------------------------------------------------------------------------------------------------------------------------------|
| Inflammatory Response                                                    | influx<br>cell movement                                     | influx of leukocytes                                 | 4.18E-04                                             | MARCO, MMP9, MPO, SERPINA1                                                                                                                                                                          |
|                                                                          |                                                             | cell movement of phagocytes                          | 3.49E-11                                             | AGT, C3, C6, C4B, CFB, CORO1A, CRP, MAP3K5, MAPK14, MC4R, NFKBIA, PLG, PTGS2, SAA1, SERPINA1, SOCS1, SOCS3, TGFB1                                                                                   |
|                                                                          |                                                             | cell movement of neutrophils                         | 3.66E-08                                             | AGT, C3, C4B, CFB, CORO1A, CRP, MAPK14, NFKBIA, PLG, PTGS2, SERPINA1, SOCS3, TGFB1                                                                                                                  |
|                                                                          |                                                             | cell movement of macrophages                         | 7.27E-07                                             | AGT, C3, C6, MAP3K5, MC4R, PTGS2, SAA1, SOCS1, TGFB1                                                                                                                                                |
|                                                                          | quantity                                                    | quantity of phagocytes                               | 6.52E-10                                             | ABCA1, AGT, C6, CFH, FABP1, HBEGF, MMP9, MMP13, NFKBIA, PLG, SOCS1, SOCS3, TF, TGFB1                                                                                                                |
|                                                                          |                                                             | quantity of macrophages                              | 1.08E-06                                             | ABCA1, AGT, FABP1, HBEGF, MMP9, NFKBIA, PLG, SOCS1, TGFB1                                                                                                                                           |
|                                                                          | complement activation<br>inflammatory response              | quantity of neutrophils                              | 1.43E-04                                             | C6, CFH, MMP9, MMP13, SOCS3, TF                                                                                                                                                                     |
|                                                                          |                                                             | complement activation<br>inflammatory response       | 1.93E-09<br>6.92E-08                                 | C3, C6, C9, C4B, CFB, CFHR1, CRP<br>AGT, C3, C6, CEBPB, CORO1A, CRP, FGG, GPX1, MAPK14, MMP9, MPO, NCF1, PLG, PTGS2, SAA1, SERPINA1, SOCS3, SPON2, TGFB1, THBS1, TXN                                |
|                                                                          | infiltration                                                | infiltration by macrophages                          | 1.45E-07                                             | AGT, C3, C6, MAP3K5, MC4R, PTGS2, SOCS1, TGFB1                                                                                                                                                      |
|                                                                          |                                                             | infiltration by neutrophils                          | 6.70E-07                                             | AGT, C3, C4B, CFB, MAPK14, NFKBIA, PLG, PTGS2, SOCS3                                                                                                                                                |
|                                                                          | inflammation                                                | inflammation                                         | 1.45E-07                                             | AGT, C3, CEBPB, CEBPD, CFB, CRP, HPX, JUNB, MAPK14, MMP9, NFKBIA, PTGS2, SOCS1, TGFB1, THBS1, UOX                                                                                                   |
|                                                                          |                                                             | inflammation of organism<br>inflammation of organ    | 9.47E-05<br>3.41E-04                                 | CEBPB, CEBPD, CRP, NFKBIA, PTGS2, SOCS1, TGFB1<br>AGT, HPX, JUNB, PTGS2, SOCS1, TGFB1, THBS1, UOX                                                                                                   |
|                                                                          | accumulation                                                | accumulation of neutrophils                          | 2.50E-07                                             | AGT, C6, C7, C9, GRN, MMP9, TIMP2                                                                                                                                                                   |
|                                                                          |                                                             | accumulation of granulocytes                         | 3.73E-07                                             | AGT, C6, C7, C9, GRN, MMP9, PLG, TIMP2                                                                                                                                                              |
|                                                                          |                                                             | accumulation of phagocytes                           | 5.73E-07                                             | AGT, C6, C7, C9, GRN, MMP9, PLG, TIMP2                                                                                                                                                              |
|                                                                          | phagocytosis                                                | accumulation of leukocytes                           | 3.97E-06                                             | AGT, C6, C7, C9, C4B, GRN, MMP9, PLG, TGFB1, TIMP2                                                                                                                                                  |
|                                                                          |                                                             | phagocytosis of cells                                | 8.46E-06                                             | ABCA1, C3, CORO1A, CRP, MAPK14, MARCO, MPO, TGFB1, THBS1                                                                                                                                            |
|                                                                          |                                                             | phagocytosis of eukaryotic cells                     | 7.51E-05                                             | ABCA1, CORO1A, CRP, MAPK14, MARCO, TGFB1, THBS1                                                                                                                                                     |
|                                                                          | activation                                                  | activation of macrophages                            | 1.12E-05                                             | C6, CRP, MPO, PLG, PTGS2, SPON2, TGFB1, THBS1                                                                                                                                                       |
|                                                                          |                                                             | activation of phagocytes<br>activation of leukocytes | 1.91E-05<br>4.80E-04                                 | C3, C6, CRP, MPO, PLG, PTGS2, SPON2, TGFB1, THBS1<br>C3, C6, C4B, CORO1A, CRP, F5, MPO, NDRG1, PLG, PTGS2, SOCS1, SPON2, TGFB1, THBS1                                                               |
|                                                                          | immune response                                             | immune response                                      | 1.85E-05                                             | AGT, ATP6V0A2, C3, C6, C4B, CEBPB, CORO1A, CRP, CTS1, DMBT1, F5, GPX1, MAPK14, MPO, NCF1, NDRG1, PLG, PTGS2, SOCS1, SPON2, TGFB1, THBS1, TPSAB1                                                     |
|                                                                          |                                                             | immune response of organism                          | 1.11E-04                                             | C3, C4B, CRP, CTS1, DMBT1, GPX1, MPO, NCF1, PTGS2, SOCS1, TGFB1, TPSAB1                                                                                                                             |
|                                                                          | chemotaxis                                                  | chemotaxis of leukocytes                             | 4.42E-05                                             | C3, CORO1A, MAPK14, MMP9, PLG, SAA1, SERPINA1, SOCS3, TGFB1, THBS1, TXN                                                                                                                             |
| migration<br>endotoxin tolerance<br>chronic renal allograft<br>rejection | migration of phagocytes                                     | 8.44E-05                                             | DMBT1, MMP9, MST1, PLG, SAA1, TGFB1, TXN             |                                                                                                                                                                                                     |
|                                                                          | endotoxin tolerance<br>chronic renal allograft<br>rejection | 9.12E-05<br>1.78E-04                                 | SOCS1, TGFB1<br>MMP9, TGFB1, TIMP2                   |                                                                                                                                                                                                     |
| Tissue Morphology                                                        | respiratory burst<br>quantity                               | respiratory burst                                    | 4.21E-04                                             | C3, DMBT1, MPO, NCF1, TGFB1                                                                                                                                                                         |
|                                                                          |                                                             | quantity of phagocytes                               | 6.52E-10                                             | ABCA1, AGT, C6, CFH, FABP1, HBEGF, MMP9, MMP13, NFKBIA, PLG, SOCS1, SOCS3, TF, TGFB1                                                                                                                |
|                                                                          |                                                             | quantity of blood cells                              | 1.58E-08                                             | ABCA1, AGT, C3, C6, CEBPB, CFH, FABP1, HBB, HBEGF, IGF2, IGFBP1, MAPK14, MMP9, MMP13, NFKBIA, PLG, PPP1R15A, SERPINA1, SOCS1, SOCS3, TF, TGFB1, THBS1                                               |
|                                                                          |                                                             | quantity of cells                                    | 1.93E-07                                             | ABCA1, AGT, C3, C6, C4B, CEBPB, CFH, FABP1, GCG, GPX1, HBB, HBEGF, IGF2, IGFBP1, JUNB, MAPK14, MMP9, MMP13, MST1, NFKBIA, PLG, PPP1R15A, PTGS2, RHO, SERPINA1, SOCS1, SOCS3, SRGN, TF, TGFB1, THBS1 |
|                                                                          |                                                             | quantity of macrophages                              | 1.08E-06                                             | ABCA1, AGT, FABP1, HBEGF, MMP9, NFKBIA, PLG, SOCS1, TGFB1                                                                                                                                           |
|                                                                          |                                                             | quantity of leukocytes                               | 5.23E-06                                             | ABCA1, AGT, C3, C6, CEBPB, CFH, FABP1, HBEGF, IGF2, MMP9, MMP13, NFKBIA, PLG, SERPINA1, SOCS1, SOCS3, TF, TGFB1                                                                                     |
|                                                                          | relaxation                                                  | quantity of neutrophils                              | 1.43E-04                                             | C6, CFH, MMP9, MMP13, SOCS3, TF                                                                                                                                                                     |
|                                                                          |                                                             | quantity of hepatoma cell lines                      | 2.72E-04                                             | FABP1, TGFB1                                                                                                                                                                                        |
|                                                                          |                                                             | quantity of bone marrow cells                        | 2.82E-04                                             | C6, CFH, MMP9, MMP13, SERPINA1, SOCS3, TF, THBS1                                                                                                                                                    |
|                                                                          |                                                             | quantity of granulocytes                             | 2.91E-04                                             | C6, CFH, MMP9, MMP13, SERPINA1, SOCS3, TF                                                                                                                                                           |
|                                                                          |                                                             | quantity of fibroblasts                              | 5.31E-04                                             | GPX1, JUNB, TGFB1                                                                                                                                                                                   |
|                                                                          | size                                                        | relaxation of artery                                 | 1.10E-07                                             | AGT, CRP, GCG, GRP, MAP3K5, PLG, TGFB1                                                                                                                                                              |
|                                                                          |                                                             | relaxation of coronary artery                        | 2.93E-05                                             | AGT, CRP, PLG                                                                                                                                                                                       |
| degradation<br>mass                                                      | size of lesion                                              | 5.22E-07                                             | C3, CRP, FGB, FGG, GPX1, IGF2, MMP9, MPO, TXN        |                                                                                                                                                                                                     |
|                                                                          | size of atherosclerotic lesion                              | 3.78E-05                                             | CRP, GPX1, IGF2, MMP9, MPO                           |                                                                                                                                                                                                     |
|                                                                          | size of infarct                                             | 8.36E-05                                             | C3, CRP, FGB, FGG, TXN                               |                                                                                                                                                                                                     |
|                                                                          | size of myocardium                                          | 2.72E-04                                             | MAPK14, PTGS2                                        |                                                                                                                                                                                                     |
|                                                                          | degradation of extracellular matrix                         | 5.41E-06                                             | CTSL1, MMP9, MMP13, PLG                              |                                                                                                                                                                                                     |
|                                                                          | mass of tissue                                              | 6.30E-06                                             | AGT, C3, CEBPB, CEBPD, IGFBP1, JUNB, LPL, MC4R, USF2 |                                                                                                                                                                                                     |
|                                                                          | mass of adipose tissue                                      | 5.08E-05                                             | AGT, C3, CEBPB, CEBPD, LPL, MC4R                     |                                                                                                                                                                                                     |

|                         |                               |                                         |                                 |                                                                                                                                                      |
|-------------------------|-------------------------------|-----------------------------------------|---------------------------------|------------------------------------------------------------------------------------------------------------------------------------------------------|
|                         |                               | mass of connective tissue               | 8.44E-05                        | AGT, C3, CEBPB, CEBPD, JUNB, LPL, MC4R                                                                                                               |
|                         | dilation                      | dilation of blood vessel                | 8.80E-06                        | AGT, GCG, MMP9, PLG, TGFB1, THBS1                                                                                                                    |
|                         |                               | dilation of artery                      | 2.24E-05                        | AGT, GCG, MMP9, TGFB1, THBS1                                                                                                                         |
|                         | cleavage                      | cleavage of extracellular matrix        | 2.93E-05                        | CTSL1, MMP13, PLG                                                                                                                                    |
|                         |                               | cleavage of cartilage tissue            | 5.40E-04                        | CTSL1, MMP13                                                                                                                                         |
|                         | closure                       | closure of wound                        | 6.21E-05                        | FGA, FGB, MMP9, TGFB1                                                                                                                                |
|                         | morphology                    | morphology of lung tissue               | 9.12E-05                        | TGFB1, THBS1                                                                                                                                         |
|                         |                               | morphology of pancreatic tissue         | 9.12E-05                        | TGFB1, THBS1                                                                                                                                         |
|                         |                               | morphology of stomach tissue            | 9.12E-05                        | TGFB1, THBS1                                                                                                                                         |
|                         |                               | morphology of testicular tissue         | 9.12E-05                        | TGFB1, THBS1                                                                                                                                         |
|                         |                               | morphology of vertebrae                 | 9.12E-05                        | TGFB1, THBS1                                                                                                                                         |
|                         |                               | morphology of heart tissue              | 2.72E-04                        | TGFB1, THBS1                                                                                                                                         |
|                         |                               | morphology of liver tissue              | 2.72E-04                        | TGFB1, THBS1                                                                                                                                         |
|                         |                               | morphology of skin tissue               | 2.72E-04                        | TGFB1, THBS1                                                                                                                                         |
|                         | remodeling                    | remodeling of extracellular matrix      | 9.12E-05                        | MMP9, MMP13                                                                                                                                          |
|                         | length                        | length of tissue                        | 1.03E-04                        | IGF2, MMP9, MMP13, TGFB1                                                                                                                             |
|                         | diameter                      | diameter of arteriole                   | 2.72E-04                        | AGT, NCF1                                                                                                                                            |
|                         | oxidative stress response     | oxidative stress response of myocardium | 2.72E-04                        | AGT, TXN                                                                                                                                             |
| Molecular Transport     | vasodilation                  | vasodilation of blood vessel            | 5.65E-04                        | AGT, GCG, MMP9, PLG                                                                                                                                  |
|                         | quantity                      | quantity of lipid                       | 1.73E-09                        | ABCA1, AGT, ANGPTL4, ARF1, C3, CEBPB, CYP24A1, FABP1, FABP2, GCG, GPX1, GRP, IGF2, INPP5K, INSIG1, LPIN1, LPL, MPO, PLG, PPP1R3C, PTGS2, RBP2, TGFB1 |
|                         |                               | quantity of fatty acid                  | 6.91E-08                        | AGT, ANGPTL4, C3, CEBPB, FABP1, GPX1, IGF2, LPIN1, LPL, PPP1R3C, PTGS2, TGFB1                                                                        |
|                         |                               | quantity of D-glucose                   | 1.77E-07                        | C3, GCG, GPX1, IGF2, IGFBP1, LPL, MAPK14, MPO, PPP1R3C, SOCS1                                                                                        |
|                         |                               | quantity of acylglycerol                | 3.13E-05                        | AGT, ANGPTL4, CEBPB, FABP1, GRP, LPIN1, LPL, MPO, PPP1R3C                                                                                            |
|                         |                               | quantity of steroid                     | 3.45E-05                        | ABCA1, AGT, CYP24A1, FABP1, GCG, IGF2, INSIG1, LPL, MPO, PLG, PTGS2                                                                                  |
|                         |                               | quantity of triacylglycerol             | 5.15E-05                        | AGT, ANGPTL4, CEBPB, FABP1, LPIN1, LPL, MPO, PPP1R3C                                                                                                 |
|                         |                               | quantity of DNA                         | 1.83E-04                        | GCG, GRP, IGF2, TGFB1                                                                                                                                |
|                         |                               | quantity of cholesterol                 | 2.42E-04                        | ABCA1, AGT, FABP1, GCG, INSIG1, LPL, MPO                                                                                                             |
|                         |                               | quantity of prostaglandin E2            | 3.75E-04                        | AGT, GPX1, IGF2, PTGS2                                                                                                                               |
|                         |                               | quantity of eicosanoid                  | 6.71E-04                        | AGT, GPX1, IGF2, PTGS2, TGFB1                                                                                                                        |
|                         | excretion                     | excretion of protein                    | 9.85E-05                        | AGT, CFB, FABP1                                                                                                                                      |
|                         |                               | excretion of sodium                     | 6.33E-04                        | AGT, PTGS2, TGFB1                                                                                                                                    |
|                         | release                       | release of Ca2+                         | 1.25E-04                        | AGT, FGA, FGB, FGG, GCG, TGFB1                                                                                                                       |
|                         |                               | release of lipid                        | 1.97E-04                        | ABCA1, AGT, C3, CEBPB, GRP, MAPK14, PLG, PTGS2                                                                                                       |
|                         | export                        | export of phosphatidic acid             | 2.72E-04                        | ABCA1, FABP1                                                                                                                                         |
|                         | uptake                        | uptake of lipid                         | 3.37E-04                        | ABCA1, C3, FABP6, LPL, MC4R, THBS1                                                                                                                   |
|                         | transport                     | transport of long chain fatty acid      | 3.60E-04                        | CPT1B, FABP1, FABP2                                                                                                                                  |
|                         | accumulation                  | accumulation of lipid                   | 4.56E-04                        | ABCA1, CEBPB, CEBPD, FABP1, HADHA, INSIG1, LPIN1, LPL                                                                                                |
|                         | Antigen Presentation          |                                         | accumulation of triacylglycerol | 6.82E-04                                                                                                                                             |
| concentration           |                               | concentration of cholesterol            | 5.31E-04                        | ABCA1, AGT, PTGS2                                                                                                                                    |
| complement activation   |                               | complement activation                   | 1.93E-09                        | C3, C6, C9, C4B, CFB, CFHR1, CRP                                                                                                                     |
| infiltration            |                               | infiltration by macrophages             | 1.45E-07                        | AGT, C3, C6, MAP3K5, MC4R, PTGS2, SOCS1, TGFB1                                                                                                       |
| cell movement           |                               | cell movement of macrophages            | 7.27E-07                        | AGT, C3, C6, MAP3K5, MC4R, PTGS2, SAA1, SOCS1, TGFB1                                                                                                 |
| quantity                |                               | quantity of macrophages                 | 1.08E-06                        | ABCA1, AGT, FABP1, HBEGF, MMP9, NFKBIA, PLG, SOCS1, TGFB1                                                                                            |
| activation              |                               | activation of macrophages               | 1.12E-05                        | C6, CRP, MPO, PLG, PTGS2, SPON2, TGFB1, THBS1                                                                                                        |
| Humoral Immune Response |                               | activation of phagocytes                | 1.91E-05                        | C3, C6, CRP, MPO, PLG, PTGS2, SPON2, TGFB1, THBS1                                                                                                    |
|                         | complement activation         | complement activation                   | 1.93E-09                        | C3, C6, C9, C4B, CFB, CFHR1, CRP                                                                                                                     |
| Carbohydrate Metabolism | quantity                      | quantity of carbohydrate                | 2.65E-09                        | ABCA1, AGT, ARF1, C3, GCG, GPX1, GRP, IGF2, IGFBP1, INPP5K, LPL, MAPK14, MPO, PPP1R3C, SOCS1, TGFB1, USF2                                            |
|                         |                               | quantity of D-glucose                   | 1.77E-07                        | C3, GCG, GPX1, IGF2, IGFBP1, LPL, MAPK14, MPO, PPP1R3C, SOCS1                                                                                        |
|                         | synthesis                     | synthesis of carbohydrate               | 8.00E-06                        | ARF1, CEBPB, GCG, IGF2, IGFBP1, PPP1R3C, PTGS2, SOCS1, SOCS3, SRGN, TGFB1                                                                            |
|                         |                               | synthesis of D-glucose                  | 1.69E-05                        | CEBPB, GCG, PPP1R3C                                                                                                                                  |
|                         |                               | synthesis of polysaccharide             | 8.44E-05                        | IGF2, IGFBP1, PPP1R3C, SOCS1, SOCS3, SRGN, TGFB1                                                                                                     |
|                         |                               | synthesis of glycogen                   | 1.36E-04                        | IGF2, IGFBP1, PPP1R3C, SOCS1, SOCS3                                                                                                                  |
|                         | glycogenolysis                | glycogenolysis of glycogen              | 8.50E-06                        | CEBPB, GCG, PPP1R3C                                                                                                                                  |
|                         | regulation                    | regulation of carbohydrate              | 6.94E-05                        | GCG, SOCS1, SOCS3                                                                                                                                    |
|                         |                               | regulation of lipopolysaccharide        | 5.40E-04                        | SOCS1, SOCS3                                                                                                                                         |
|                         | modification                  | modification of carbohydrate            | 1.39E-04                        | C3, FABP1, GCG, IGFBP1, LPL, TGFB1, THBS1                                                                                                            |
|                         |                               | modification of D-glucose               | 5.13E-04                        | C3, GCG, IGFBP1, LPL                                                                                                                                 |
|                         | incorporation                 | incorporation of D-glucose              | 1.78E-04                        | GCG, IGF2, PPP1R3C                                                                                                                                   |
|                         | export                        | export of phosphatidic acid             | 2.72E-04                        | ABCA1, FABP1                                                                                                                                         |
| efflux                  | efflux of carbohydrate        | 2.90E-04                                | ABCA1, FABP1, PTGS2             |                                                                                                                                                      |
| metabolic process       | metabolic process of glycogen | 4.18E-04                                | CEBPB, GCG, IGF2, PPP1R3C       |                                                                                                                                                      |
| secretion               | secretion of carbohydrate     | 6.33E-04                                | ABCA1, GRP, TGFB1               |                                                                                                                                                      |

<sup>a</sup> Human transcripts that are homologous to zebrafish transcripts that are differentially expressed in 6dpf CONVD compared to GF zebrafish larvae.
