# Supplementary material
Source: PubMed Central journal article supplement (PMC3164861)
Supplement: NIHMS287381-supplement-05.pdf [file NIHMS287381-supplement-05.pdf]

**Table S4: Canonical pathways annotated by IPA and changed in 6dpf CONVD compared to GF zebrafish larvae**

| Canonical Pathway                                                              | -log(p-value) | Molecules <sup>a</sup>                                                                                                            |
|--------------------------------------------------------------------------------|---------------|-----------------------------------------------------------------------------------------------------------------------------------|
| Acute Phase Response Signaling                                                 | 1.84E01       | SERPINA1, C9, SAA1, AGT, CRP, MAP3K5, C4B, CEBPB, RBP2, SOCS1, CFB, PLG, NFKBIA, FGB, SOCS3, FGG, MAPK14, C3, ITIH4, FGA, HPX, TF |
| Complement System                                                              | 7.56E00       | C7, C9, C4B, C6, CFH, C3, CFB                                                                                                     |
| Coagulation System                                                             | 5.9E00        | SERPINA1, PLG, FGB, FGG, F5, FGA                                                                                                  |
| Glioma Invasiveness Signaling                                                  | 3.79E00       | PLG, RHOG, RHOU, MMP9, TIMP2                                                                                                      |
| Methane Metabolism                                                             | 3.36E00       | MPO, PRDX1, ACADM                                                                                                                 |
| Fatty Acid Elongation in Mitochondria                                          | 3.27E00       | HADH, HADHA, HADHB                                                                                                                |
| Neuroprotective Role of THOP1 in Alzheimer's Disease                           | 3.25E00       | PLG, AGT, PRKACB, MMP9                                                                                                            |
| Production of Nitric Oxide and Reactive Oxygen Species in Macrophages          | 3.19E00       | NFKBIA, RHOG, RHOU, MAP3K5, MAPK14, MPO, PPP1R3C                                                                                  |
| Lysine Degradation                                                             | 3.12E00       | ASTL, BBOX1, MMP9, HADH, MMP13, HADHA, HADHB                                                                                      |
| Role of Macrophages, Fibroblasts and Endothelial Cells in Rheumatoid Arthritis | 2.98E00       | TGFB1, NFKBIA, SOCS3, MAPK14, TRY6, MMP13, CEBPB, CEBPD, SOCS1, CFB                                                               |
| PPAR $\alpha$ /RXR $\alpha$ Activation                                         | 2.98E00       | TGFB1, NFKBIA, MAPK14, ABCA1, GPD1, PRKACB, LPL                                                                                   |
| Stilbene, Coumarine and Lignin Biosynthesis                                    | 2.82E00       | MPO, CYP24A1, PRDX1                                                                                                               |
| Fatty Acid Metabolism                                                          | 2.8E00        | CPT1B, CYP1A1, HADH, HADHA, HADHB, ACADM                                                                                          |
| Phototransduction Pathway                                                      | 2.78E00       | GNGT2, OPN1LW, RHO, PRKACB                                                                                                        |
| p38 MAPK Signaling                                                             | 2.62E00       | TGFB1, MAP3K5, MAPK14, TIFA, MKNK2                                                                                                |
| Atherosclerosis Signaling                                                      | 2.58E00       | TGFB1, MMP9, MMP13, LPL, TPSAB1                                                                                                   |
| Germ Cell-Sertoli Cell Junction Signaling                                      | 2.51E00       | TGFB1, RHOG, RHOU, MAP3K5, MAPK14, TUBA1A                                                                                         |
| Type I Diabetes Mellitus Signaling                                             | 2.49E00       | NFKBIA, SOCS3, MAP3K5, MAPK14, SOCS1                                                                                              |
| Propanoate Metabolism                                                          | 2.43E00       | HADHA, ACSS1, HADHB, ACADM                                                                                                        |
| LXR/RXR Activation                                                             | 2.36E00       | ABCA1, MMP9, HADH, LPL                                                                                                            |
| Valine, Leucine and Isoleucine Degradation                                     | 2.36E00       | HADH, HADHA, HADHB, ACADM                                                                                                         |
| Type II Diabetes Mellitus Signaling                                            | 2.34E00       | NFKBIA, SOCS3, MAP3K5, CEBPB, SOCS1                                                                                               |
| IL-17 Signaling                                                                | 2.3E00        | PTGS2, CRP, MAPK14, CEBPB                                                                                                         |
| IL-8 Signaling                                                                 | 2.28E00       | HBEGF, PTGS2, RHOG, RHOU, MPO, MMP9                                                                                               |
| Synthesis and Degradation of Ketone Bodies                                     | 2.25E00       | HADHA, HADHB                                                                                                                      |
| Colorectal Cancer Metastasis Signaling                                         | 2.17E00       | TGFB1, PTGS2, RHOG, RHOU, PRKACB, MMP9, MMP13                                                                                     |
| Hepatic Fibrosis / Hepatic Stellate Cell Activation                            | 2.11E00       | TGFB1, AGT, MMP9, MMP13, TIMP2                                                                                                    |
| Leukocyte Extravasation Signaling                                              | 2.05E00       | MAPK14, CLDN4, MMP9, MMP13, TIMP2, CLDN9                                                                                          |
| IL-6 Signaling                                                                 | 2.01E00       | NFKBIA, MAPK14, CEBPB, SOCS1                                                                                                      |
| Inositol Metabolism                                                            | 2.01E00       | COX6B1, ETFDH, ERO1L, DECR1                                                                                                       |
| Glucocorticoid Receptor Signaling                                              | 1.97E00       | TGFB1, NFKBIA, AGT, FGG, MAPK14, PRKACB, CEBPB                                                                                    |
| LPS/IL-1 Mediated Inhibition of RXR Function                                   | 1.95E00       | CPT1B, FABP6, SULT2B1, ABCA1, FABP1, FABP2                                                                                        |
| $\beta$ -alanine Metabolism                                                    | 1.85E00       | HADHA, HADHB, ACADM                                                                                                               |
| Tryptophan Metabolism                                                          | 1.84E00       | CYP1A1, PTGS2, HADH, HADHA, HADHB                                                                                                 |
| HIF1 $\alpha$ Signaling                                                        | 1.78E00       | EGLN3, MAPK14, MMP9, MMP13                                                                                                        |
| Pancreatic Adenocarcinoma Signaling                                            | 1.76E00       | TGFB1, HBEGF, PTGS2, MMP9                                                                                                         |
| Maturity Onset Diabetes of Young (MODY) Signaling                              | 1.73E00       | FABP1, FABP2                                                                                                                      |
| Cardiac Hypertrophy Signaling                                                  | 1.71E00       | TGFB1, RHOG, RHOU, MAP3K5, MAPK14, PRKACB                                                                                         |
| IL-10 Signaling                                                                | 1.7E00        | NFKBIA, SOCS3, MAPK14                                                                                                             |
| RAR Activation                                                                 | 1.67E00       | TGFB1, MAP3K5, MAPK14, PRKACB, RBP2                                                                                               |
| Butanoate Metabolism                                                           | 1.67E00       | HADH, HADHA, HADHB                                                                                                                |
| IL-12 Signaling and Production in Macrophages                                  | 1.66E00       | TGFB1, MST1, MAPK14, CEBPB                                                                                                        |
| Growth Hormone Signaling                                                       | 1.65E00       | IGF2, SOCS3, SOCS1                                                                                                                |
| NRF2-mediated Oxidative Stress Response                                        | 1.61E00       | TXN, JUNB, MAP3K5, MAPK14, PRDX1                                                                                                  |
| IL-22 Signaling                                                                | 1.56E00       | SOCS3, MAPK14                                                                                                                     |
| Prolactin Signaling                                                            | 1.56E00       | SOCS3, CEBPB, SOCS1                                                                                                               |
| ILK Signaling                                                                  | 1.55E00       | PTGS2, RHOG, RHOU, KRT18, MMP9                                                                                                    |
| LPS-stimulated MAPK Signaling                                                  | 1.54E00       | NFKBIA, MAP3K5, MAPK14                                                                                                            |
| 4-1BB Signaling in T Lymphocytes                                               | 1.5E00        | NFKBIA, MAP3K5                                                                                                                    |
| Dopamine Receptor Signaling                                                    | 1.47E00       | PRKACB, QDPR, PPP1R3C                                                                                                             |
| Mitochondrial Dysfunction                                                      | 1.44E00       | CPT1B, COX6B1, COX4I1, NDUFA4                                                                                                     |
| Hepatic Cholestasis                                                            | 1.43E00       | FABP6, NFKBIA, GCG, PRKACB                                                                                                        |
| VDR/RXR Activation                                                             | 1.42E00       | IGFBP1, CEBPB, CYP24A1                                                                                                            |

|                                                                           |         |                                                   |
|---------------------------------------------------------------------------|---------|---------------------------------------------------|
| Molecular Mechanisms of Cancer                                            | 1.38E00 | TGFB1, NFKBIA, RHOG, RHOU, MAP3K5, MAPK14, PRKACB |
| Pyruvate Metabolism                                                       | 1.38E00 | HADHA, ACSS1, HADHB                               |
| Phenylalanine Metabolism                                                  | 1.33E00 | MPO, PRDX1                                        |
| MIF Regulation of Innate Immunity                                         | 1.31E00 | NFKBIA, PTGS2                                     |
| April Mediated Signaling                                                  | 1.31E00 | NFKBIA, MAPK14                                    |
| Role of Osteoblasts, Osteoclasts and Chondrocytes in Rheumatoid Arthritis | 1.3E00  | TGFB1, NFKBIA, MAP3K5, MAPK14, MMP13              |
| Bladder Cancer Signaling                                                  | 1.29E00 | THBS1, MMP9, MMP13                                |
| RANK Signaling in Osteoclasts                                             | 1.28E00 | NFKBIA, MAP3K5, MAPK14                            |
| B Cell Activating Factor Signaling                                        | 1.27E00 | NFKBIA, MAPK14                                    |
| Role of PKR in Interferon Induction and Antiviral Response                | 1.25E00 | NFKBIA, MAPK14                                    |
| IL-1 Signaling                                                            | 1.24E00 | NFKBIA, MAPK14, PRKACB                            |
| Oxidative Phosphorylation                                                 | 1.24E00 | COX6B1, COX4I1, ATP6V0A2, NDUFA4                  |
| HMGB1 Signaling                                                           | 1.23E00 | RHOG, RHOU, MAPK14                                |
| Tight Junction Signaling                                                  | 1.18E00 | TGFB1, CLDN4, PRKACB, CLDN9                       |
| Cholecystokinin/Gastrin-mediated Signaling                                | 1.16E00 | RHOG, RHOU, MAPK14                                |
| Airway Pathology in Chronic Obstructive Pulmonary Disease                 | 1.13E00 | MMP9                                              |
| Bile Acid Biosynthesis                                                    | 1.13E00 | HADHA, HADHB                                      |
| Renin-Angiotensin Signaling                                               | 1.12E00 | AGT, MAPK14, PRKACB                               |
| Toll-like Receptor Signaling                                              | 1.11E00 | NFKBIA, MAPK14                                    |
| CD27 Signaling in Lymphocytes                                             | 1.07E00 | NFKBIA, MAP3K5                                    |
| Semaphorin Signaling in Neurons                                           | 1.05E00 | RHOG, RHOU                                        |
| Corticotropin Releasing Hormone Signaling                                 | 1.04E00 | PTGS2, MAPK14, PRKACB                             |
| Amyloid Processing                                                        | 1.02E00 | MAPK14, PRKACB                                    |

<sup>a</sup> Human transcripts that are homologous to zebrafish transcripts that are differentially expressed in 6dpf CONVD compared to GF zebrafish larvae.
