# Supplementary material
Source: PubMed Central journal article supplement (PMC3164861)
Supplement: NIHMS287381-supplement-06.pdf [file NIHMS287381-supplement-06.pdf]

**Table S5: Zebrafish genes that are differentially expressed in CONVD compared to GF zebrafish larvae at 6dpf, and also homologous to vertebrate NF- $\kappa$ B target genes**

| Zebrafish genes differentially expressed in 6dpf CONVD vs. GF zebrafish larvae        |                          |                                           |                                              |                                            | Homologous human NF- $\kappa$ B target genes                                        |                |                                        |
|---------------------------------------------------------------------------------------|--------------------------|-------------------------------------------|----------------------------------------------|--------------------------------------------|-------------------------------------------------------------------------------------|----------------|----------------------------------------|
| Gene name <sup>a</sup>                                                                | Gene symbol <sup>a</sup> | ZFIN ID <sup>a</sup>                      | Ensembl ID <sup>a</sup>                      | Probe set ID <sup>b</sup>                  | Gene name                                                                           | Gene symbol    | Reference <sup>c</sup>                 |
| novel mucin protein                                                                   | A1L1X2_DANRE             | --                                        | ENSDARG00000069841                           | Dr.6064.1.A1_at                            | mucin 2, intestinal/tracheal                                                        | MUC2           | Jono et al., 2002; Lee et al., 2002    |
| ATP-binding cassette, sub-family A (ABC1), member 1A                                  | abca1a                   | ZDB-GENE-031006-12                        | ENSDARG00000074635                           | Dr.7365.1.A1_at                            | ATP-binding cassette, sub-family A (ABC1), member 1                                 | ABCA1          | Gerbod-Giannone et al., 2006           |
| angiotensinogen                                                                       | agt                      | ZDB-GENE-030131-1205                      | ENSDARG00000016412                           | Dr.3585.1.S1_at                            | angiotensinogen                                                                     | AGT            | Ron et al., 1990                       |
| ba2 globin                                                                            | ba2                      | ZDB-GENE-990415-19                        | ENSDARG00000077603 ///<br>ENSDARG00000078255 | Dr.25155.1.S1_s_at                         | hemoglobin, epsilon 1                                                               | HBE1           | Hou et al., 2002                       |
| complement component C3a                                                              | c3a                      | ZDB-GENE-030131-9749                      | ENSDARG00000012694                           | Dr.6845.1.S1_at ///<br>Dr.7722.1.A1_at     | complement component 3                                                              | C3             | Moon et al., 1999                      |
| complement component C3b /// complement component C3c                                 | c3b /// c3c              | ZDB-GENE-990415-37                        | ENSDARG00000052207                           | Dr.20291.1.A1_at ///<br>Dr.21005.1.S1_s_at | complement component 3                                                              | C3             | Moon et al., 1999                      |
| complement component C3c                                                              |                          |                                           |                                              |                                            |                                                                                     |                |                                        |
| complement C4                                                                         | c4                       | --                                        | ENSDARG00000038424                           | Dr.12491.1.A1_at                           | complement component 4A                                                             | C4A            | Yu et al., 1989                        |
| CCAAT/enhancer binding protein (C/EBP), delta                                         | cebpd                    | ZDB-GENE-020111-4                         | --                                           | Dr.1280.1.A1_at ///<br>Dr.1280.1.A2_at     | CCAAT/enhancer binding protein (C/EBP), delta                                       | CEBPD          | Liu et al., 2007                       |
| complement factor B                                                                   | cfb                      | ZDB-GENE-980526-487                       | ENSDARG00000055278                           | Dr.190.1.S1_at ///<br>Dr.22145.1.A1_at     | complement factor B                                                                 | CFB            | Nonaka and Huang, 1990                 |
| cathepsin L1, a fatty acid binding protein 6, ileal (gastrotropin)                    | ctsl1a<br>fabp6          | ZDB-GENE-030131-106<br>ZDB-GENE-040625-49 | ENSDARG00000007836<br>ENSDARG00000044566     | Dr.19902.1.S1_at<br>Dr.18599.1.S1_at       | cathepsin L1<br>fatty acid binding protein 6, ileal (gastrotropin)                  | CTSL1<br>FABP6 | Seth et al., 2003<br>Fang et al., 2007 |
| insulin-like growth factor binding protein 1a                                         | igfbp1a                  | ZDB-GENE-021231-1                         | ENSDARG00000014947                           | Dr.8587.1.A1_at ///<br>Dr.8587.1.A2_at     | insulin-like growth factor binding protein 1                                        | IGFBP1         | Lang et al., 1999                      |
| insulin-like growth factor binding protein 1b                                         | igfbp1b                  | ZDB-GENE-081210-3                         | ENSDARG00000038666                           | Dr.16095.1.S1_at                           | insulin-like growth factor binding protein 1                                        | IGFBP1         | Lang et al., 1999                      |
| jun B proto-oncogene, like                                                            | junbl                    | ZDB-GENE-040426-2666                      | --                                           | Dr.737.1.A1_at                             | jun B proto-oncogene                                                                | JUNB           | Brown et al., 1995                     |
| similar to mucin 2 (MUC2)                                                             | LOC100148804             | --                                        | ENSDARG00000039253                           | Dr.14396.1.A1_at                           | mucin 2, intestinal/tracheal                                                        | MUC2           | Jono et al., 2002; Lee et al., 2002    |
| similar to Thrombospondin 1                                                           | LOC100151346             | --                                        | --                                           | Dr.17761.1.S1_at                           | thrombospondin 1                                                                    | THBS1          | Yang et al., 2004                      |
| similar to TRAF2 binding protein (TIFA)                                               | LOC560548                | --                                        | ENSDARG00000022134                           | Dr.17438.1.S1_at                           | TRAF-interacting protein with a forkhead-associated domain                          | TIFA           | Chang et al., 2005                     |
| matrix metalloproteinase 9                                                            | mmp9                     | ZDB-GENE-040426-2132                      | ENSDARG00000042816                           | Dr.967.1.S1_at                             | matrix metalloproteinase 9                                                          | MMP9           | Bond et al., 1998                      |
| nuclear factor of kappa light polypeptide gene enhancer in B-cells inhibitor, alpha a | ikbaa                    | ZDB-GENE-040426-2227                      | ENSDARG00000005481                           | Dr.7368.1.A1_at                            | nuclear factor of kappa light polypeptide gene enhancer in B-cells inhibitor, alpha | IKBA           | Sun et al., 1993                       |
| nuclear factor of kappa light polypeptide gene enhancer in B-cells inhibitor, alpha b | ikbab                    | ZDB-GENE-030131-1819                      | ENSDARG00000007693                           | Dr.24507.1.S1_at                           | nuclear factor of kappa light polypeptide gene enhancer in B-cells inhibitor, alpha | IKBA           | Sun et al., 1993                       |

|                                                                                                                         |                                  |                                                                     |                                                                    |                                          |                                                                                      |                           |                                                              |
|-------------------------------------------------------------------------------------------------------------------------|----------------------------------|---------------------------------------------------------------------|--------------------------------------------------------------------|------------------------------------------|--------------------------------------------------------------------------------------|---------------------------|--------------------------------------------------------------|
| prostaglandin-endoperoxide synthase 2a                                                                                  | ptgs2a                           | ZDB-GENE-020530-2                                                   | ENSDARG0000004539                                                  | Dr.1082.1.S1_at                          | prostaglandin-endoperoxide synthase 2                                                | PTGS2                     | Yamamoto et al., 1995; Inoue and Tanabe 1998                 |
| serum amyloid A serine proteinase inhibitor, clade A, member 1 /// serine proteinase inhibitor, clade A, member 1, like | saa<br>serpina1 ///<br>serpina1l | ZDB-GENE-040927-15<br>ZDB-GENE-030131-1421 ///<br>ZDB-GENE-040721-3 | ENSDARG00000045999<br>ENSDARG00000078556 ///<br>ENSDARG00000079619 | Dr.13131.1.S1_at<br>Dr.1605.1.S1_at      | serum amyloid A1 /// serum amyloid A2 serine proteinase inhibitor, clade A, member 1 | SAA1 /// SAA2<br>SERPINA1 | Li and Liao, 1991; Edbrooke et al., 1991<br>Ray et al., 1995 |
| novel pentraxin-related gene                                                                                            | si:ch211-234p6.12                | ZDB-GENE-060503-220                                                 | ENSDARG00000042613                                                 | Dr.20270.1.S1_at                         | C-reactive protein, pentraxin-related                                                | CRP                       | Cha-Molstad et al., 2000                                     |
| transferrin a                                                                                                           | tfa                              | ZDB-GENE-980526-35                                                  | ENSDARG00000016771                                                 | Dr.1889.1.S1_at ///<br>Dr.1889.2.A1_a_at | transferrin /// lactotransferrin                                                     | TF /// LTF                | Harizanova et al., 2005; Zheng et al., 2005                  |
| similar to complement component C3                                                                                      | zgc:103710                       | ZDB-GENE-041212-2                                                   | ENSDARG00000043719                                                 | Dr.23731.1.A1_at                         | complement component 3                                                               | C3                        | Moon et al., 1999                                            |

<sup>a</sup> If a probe set represents multiple zebrafish transcripts, those genes are listed together separated by "///".

<sup>b</sup> If a zebrafish transcript is represented by multiple probe sets, those probe sets are listed together separated by "///".

<sup>c</sup> References indicating that respective vertebrate gene is a target of the NF- $\kappa$ B pathway.
