# Supplementary material
Source: PubMed Central journal article supplement (PMC3164861)
Supplement: NIHMS287381-supplement-07.pdf [file NIHMS287381-supplement-07.pdf]

**Table S6: Primers used in this study**

| Primer name          | Primer sequence (5'-3')                        | Purpose                  |
|----------------------|------------------------------------------------|--------------------------|
| ikbaa(P1) F          | GCCCTTCTCGTGCGTCT                              | Cell ChIP, -160          |
| ikbaa(P1) R          | TGAAGCCCGAGAGAGGC                              | Cell ChIP, -160          |
| ikbaa(P2) F          | ATGCATGGAGGAAACTGATCT                          | Cell and Fish ChIP, -595 |
| ikbaa(P2) R          | GATGGGCTAATAAAGTGAACA                          | Cell and Fish ChIP, -595 |
| ikbaa(P3) F          | TGGGGTGTCGGAAGAAAA                             | Cell ChIP, -1893         |
| ikbaa(P3) R          | TAGGCAAATAACTGAGAAAGCAT                        | Cell ChIP, -1893         |
| EGFP NF-kB F         | AGCTTCGAATTCTGCAGGTC                           | Fish ChIP                |
| EGFP NF-kB R         | ATGCACGGTCGAGGGACT                             | Fish ChIP                |
| ikbaa promoter F     | TTGGGGTACCGAAACTGTTGTGGCTGCTG                  | Promoter Plasmid         |
| ikbaa promoter R     | GTTCTCGAGCGGCTCTGTGTAAATCCA                    | Promoter Plasmid         |
| Synthetic enhancer F | GGGGACAAGTTTGTACAAAAAAGCAGGCTTAGGGCTCAAGCTTCG  | Reporter Construct       |
| Synthetic enhancer R | GGGGACCACTTTGTACAAGAAAGCTGGGTACTGTGAATGCATGCAC | Reporter Construct       |
| rela F               | TGGAGAGAAGAGCAACGACACC                         | MO Validation            |
| rela R               | CAGCTTCTCCACATCCTTCTTC                         | MO Validation            |
| myd88 F              | TCTTGACGGACTGGGAAACTC                          | MO Validation            |
| myd88 R              | GATTTGTAGACGACAGGGATTAGCC                      | MO Validation            |
| saa F                | AAGCTTCTTCTTGCTGTGCTGGTG                       | Riboprobe synthesis      |
| saa R                | TAATACGACTCACTATAGGG-TGGGCAGGCCTTTAGGTCTGTATT  | Riboprobe synthesis      |
| cfb F                | TGAGATCCTGATGTTTGCGACGGA                       | Riboprobe synthesis      |
| cfb R                | TAATACGACTCACTATAGGG-ACGTATTCTGCACCTCGTCCAAGT  | Riboprobe synthesis      |
| 18S F                | CACCTGTCCCTCTAAGAAGTTGCA                       | qRT-PCR                  |
| 18S R                | GGTTGATTCCGATAACGAACGA                         | qRT-PCR                  |
| ikbaa F              | GCCGTGCAGATCATCAAAC                            | qRT-PCR                  |
| ikbaa R              | CCGCTGTAGTTAGGGAAGGT                           | qRT-PCR                  |
| cfb F                | GCCACAGTGCTACGCTGATTT                          | qRT-PCR                  |
| cfb R                | GTTGAACTGTTAGAGTTGTTCGTTAGAGAATT               | qRT-PCR                  |
| saa F                | CGCAGAGGCAATTCAGAT                             | qRT-PCR                  |
| saa R                | CAGGCCTTTAAGTCTGTATTTGTTG                      | qRT-PCR                  |
| mpo F                | TCCAAAGCTATGTGGGATGTGA                         | qRT-PCR                  |
| mpo R                | GTCGTCCGGCAAACACTGAA                           | qRT-PCR                  |
| gpx1a F              | CAGATGAACGAGCTCCACAG                           | qRT-PCR                  |
| gpx1a R              | TTCTTGCAAGTTCTCCTGGTG                          | qRT-PCR                  |
| gpx1b F              | AACTGCACAAATGAAGAGATCCTTT                      | qRT-PCR                  |
| gpx1b R              | CCACTTTCTCCAAGAGCTGGAAT                        | qRT-PCR                  |
| hadha F              | AGGATCTTGGCAAGGCTTTTG                          | qRT-PCR                  |
| hadha R              | TTGCGTCCTTTGAACCCTTT                           | qRT-PCR                  |
| angptl4 F            | CGAGCGCATCAAGCAACA                             | qRT-PCR                  |
| angptl4 R            | TCGCTCGTTTTTCATCGTAATCT                        | qRT-PCR                  |
| fabp2 F              | TGCCCATGACAACCTGAAGA                           | qRT-PCR                  |
| fabp2 R              | GTTAATTTCCAGTGTGCGGAAAG                        | qRT-PCR                  |
| zgc:92590 F          | CTGGTGTGGAGCATCTTGA                            | qRT-PCR                  |
| zgc:92590 R          | CTTCGACGACTACGTTGTGC                           | qRT-PCR                  |
| cpt1a F              | GCAGATGACGGTTATGGTGTTC                         | qRT-PCR                  |
| cpt1a R              | CCGTCTCAGGACTGGAGAACTT                         | qRT-PCR                  |
| nfkbiaa F            | GCCGGACAGCCCTTAAATTC                           | qRT-PCR                  |
| nfkbiaa R            | TCATAAATACAATCGTCCTCACACATG                    | qRT-PCR                  |
| nfkbiab F            | CTCACCGAGGACGGAGACA                            | qRT-PCR                  |
| nfkbiab R            | CTCTTCGGGATAACGCAATCA                          | qRT-PCR                  |
| pla2g15 F            | CACCTGGCTCTTACCCTACG                           | qRT-PCR                  |
| pla2g15 R            | GCCATCCTCGTAGTCGATGT                           | qRT-PCR                  |
| mmp9 F               | CATCACTGAAATCCAGAAGGACTT                       | qRT-PCR                  |
| mmp9 R               | GTTACCATTGCCTGAGATCTTC                         | qRT-PCR                  |
