# Supplementary material
Source: PubMed Central journal article supplement (PMC3164861)
Supplement: NIHMS287381-supplement-08.pdf [file NIHMS287381-supplement-08.pdf]

**Table S7: Quantitative RT-PCR validation of zebrafish transcripts identified as differentially expressed in 6dpf CONVD versus GF larvae**

| Gene                        | Fold Difference <sup>a</sup> | SEM  | P Value  |
|-----------------------------|------------------------------|------|----------|
| <i>saa</i>                  | 31.79                        | 6.11 | 7.08E-06 |
| <i>cfb</i>                  | 5.94                         | 0.78 | 5.87E-04 |
| <i>mmp9</i>                 | 5.00                         | 0.65 | 5.02E-04 |
| <i>mpo</i>                  | 4.72                         | 1.22 | 5.94E-03 |
| <i>gpx1b</i>                | 1.98                         | 0.21 | 3.70E-04 |
| <i>nfkbiab</i>              | 1.23                         | 0.04 | 4.03E-03 |
| <i>gpx1a</i>                | 1.08                         | 0.15 | 9.30E-01 |
| <i>nfkbias</i> <sup>b</sup> | 1.08                         | 0.22 | 5.77E-01 |
| <i>pla2g15</i> <sup>b</sup> | 1.04                         | 0.13 | 9.74E-01 |
| <i>cpt1a</i>                | 0.38                         | 0.02 | 9.03E-13 |
| <i>hadha</i>                | 0.30                         | 0.02 | 9.77E-05 |
| <i>angptl4</i>              | 0.27                         | 0.03 | 2.39E-06 |
| <i>zgc:92590</i>            | 0.11                         | 0.01 | 9.73E-06 |
| <i>fabp2</i>                | 0.10                         | 0.01 | 6.31E-08 |

<sup>a</sup> Fold difference of transcript level in 6dpf zebrafish larvae is shown as CONVD/GF.

<sup>b</sup> Transcripts that did not display significant differences in expression level ( $P < 0.05$ ) between 6dpf CONVD and GF larvae.
