# Supplementary material
Source: PubMed Central journal article supplement (PMC3164861)

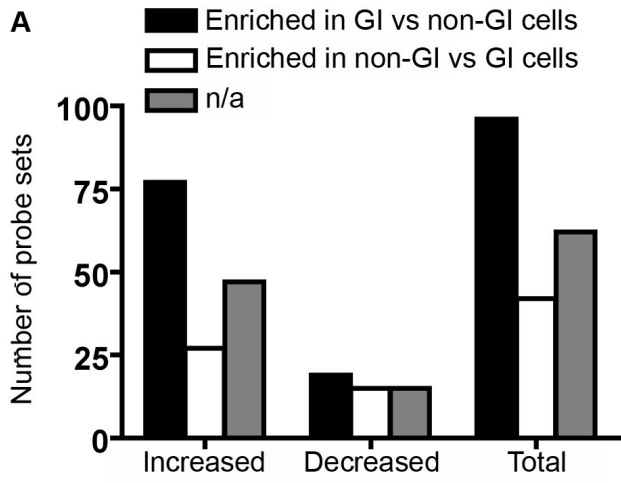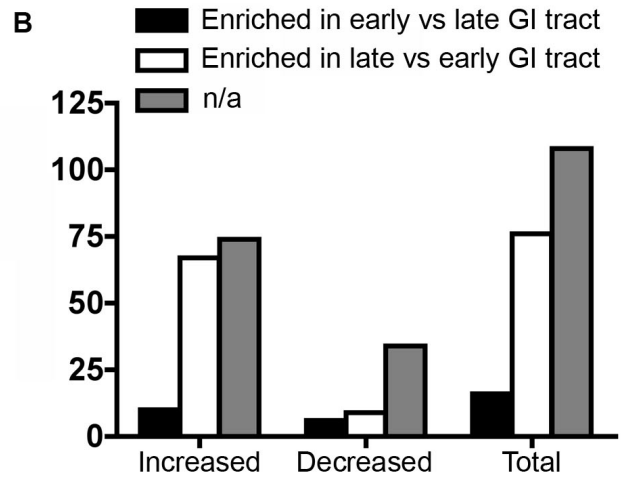

Supplement: NIHMS287381-supplement-09.pdf [file NIHMS287381-supplement-09.pdf]

Media

Bay 11-7085

Control

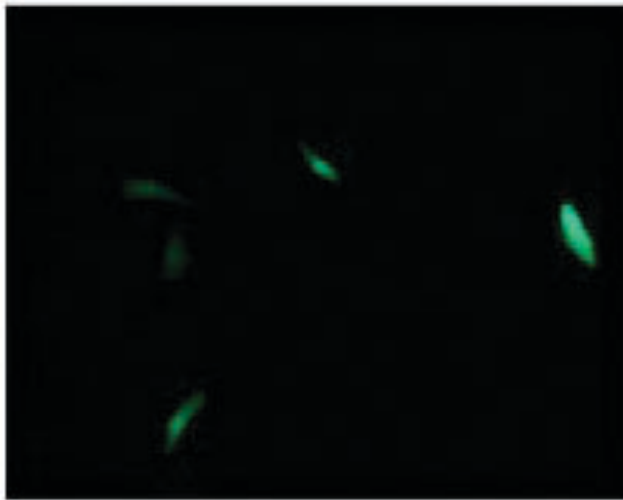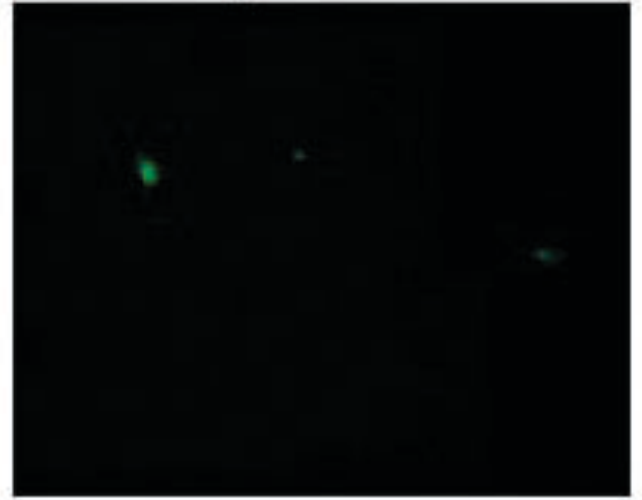

LPS

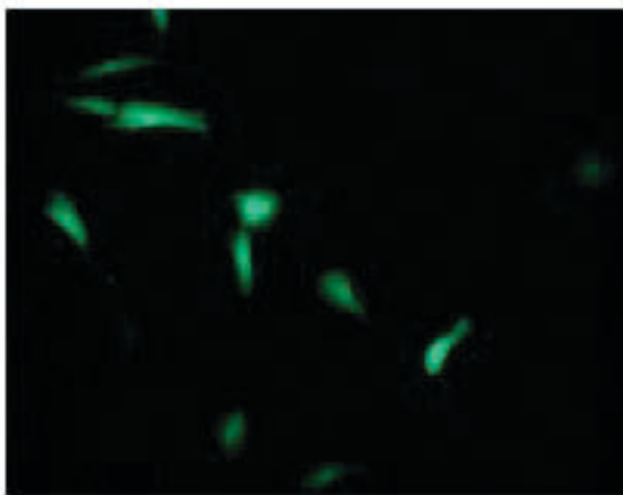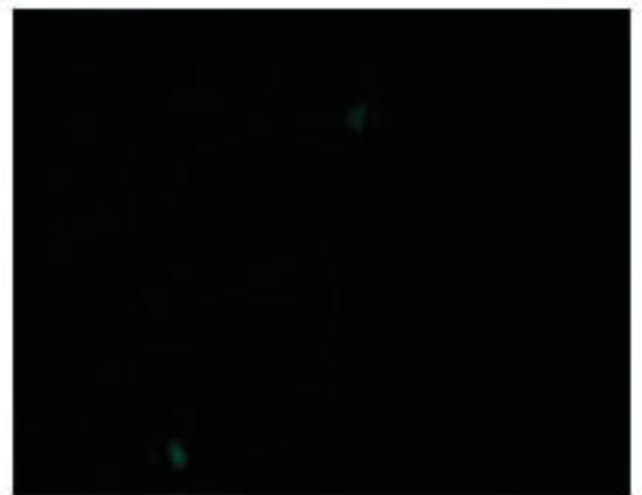

Supplement: NIHMS287381-supplement-11.pdf [file NIHMS287381-supplement-11.pdf]

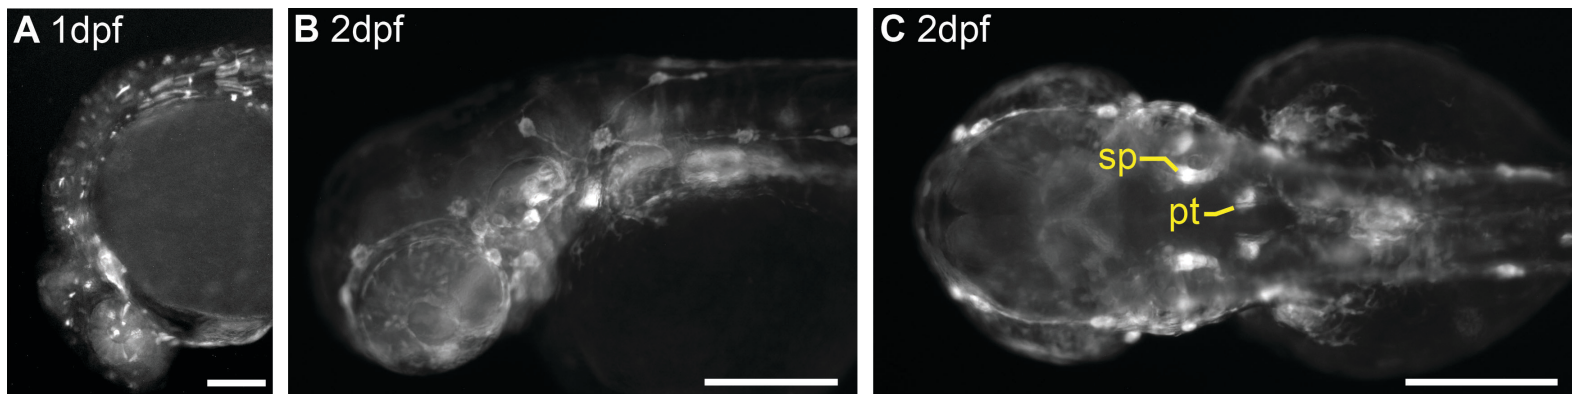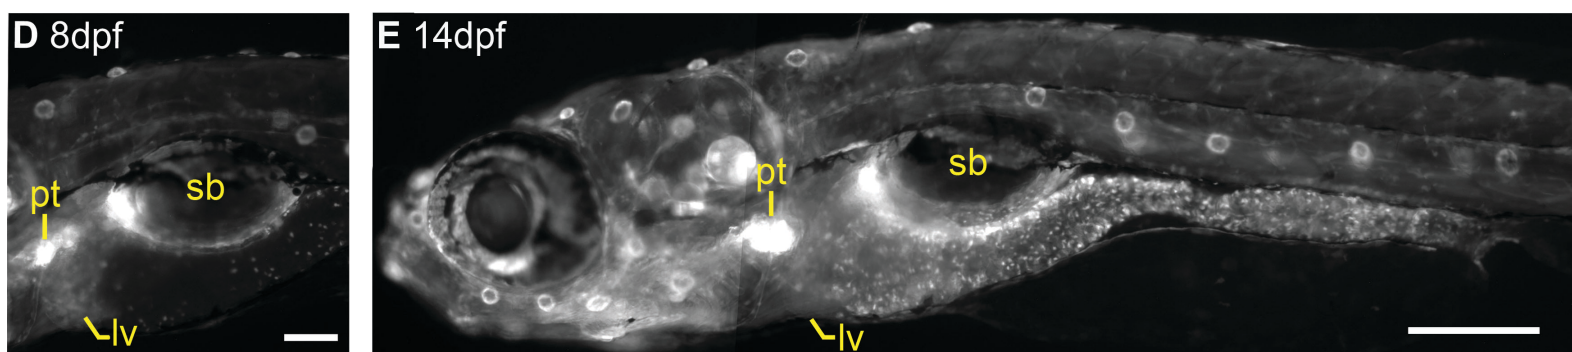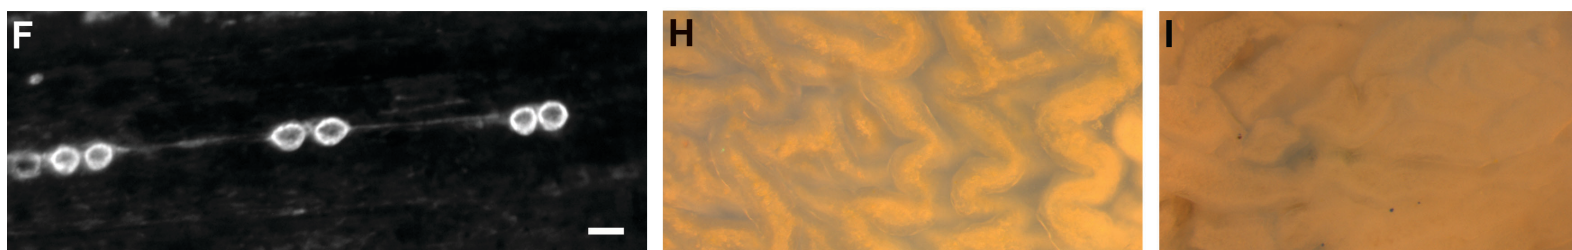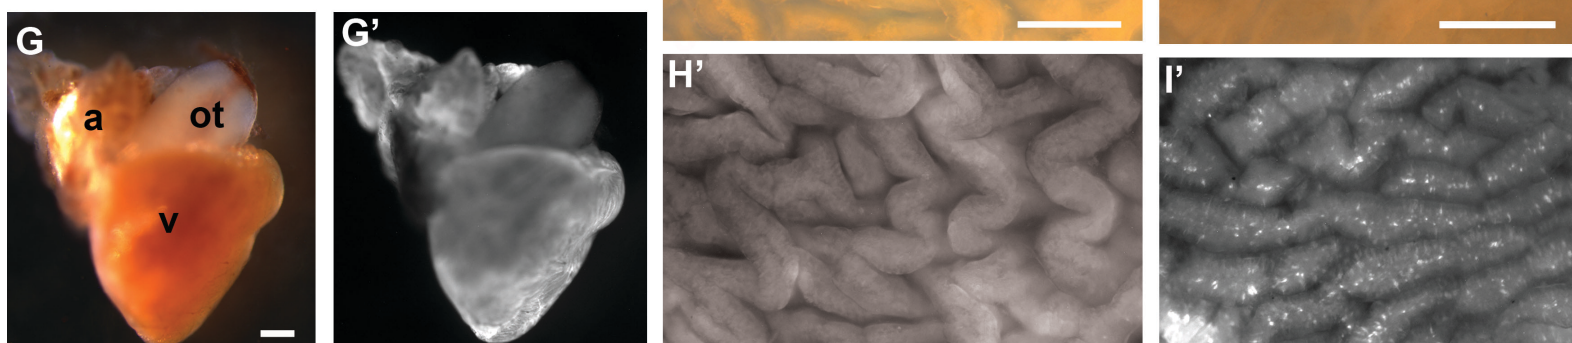

Supplement: NIHMS287381-supplement-12.pdf [file NIHMS287381-supplement-12.pdf]

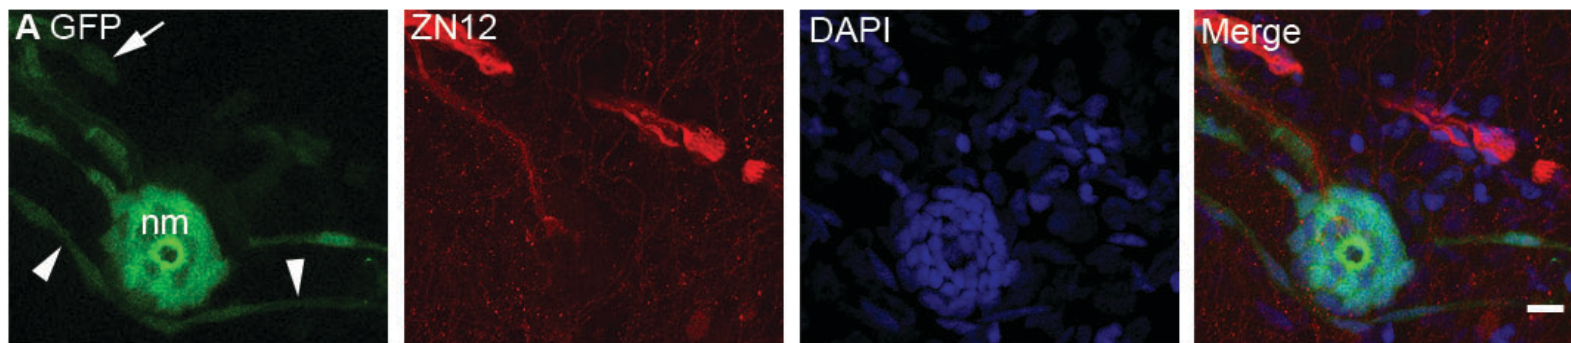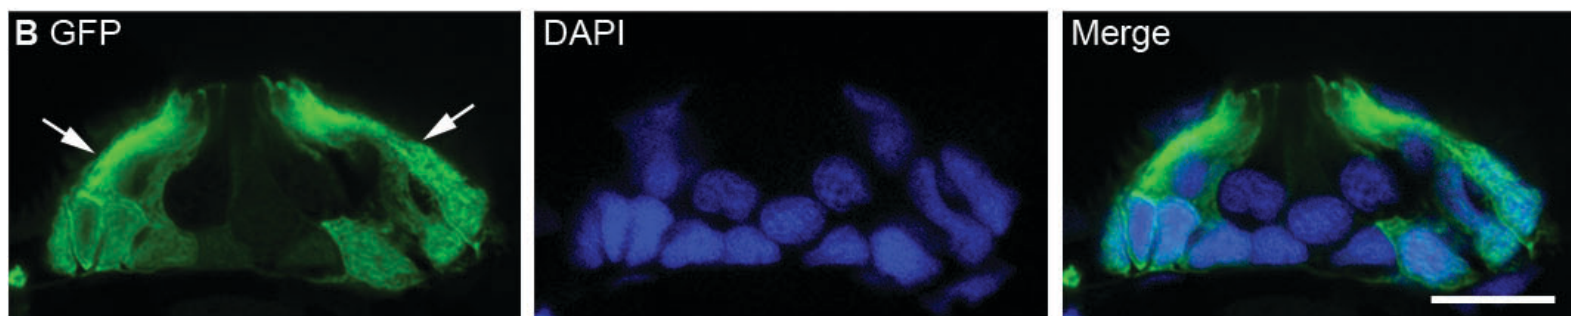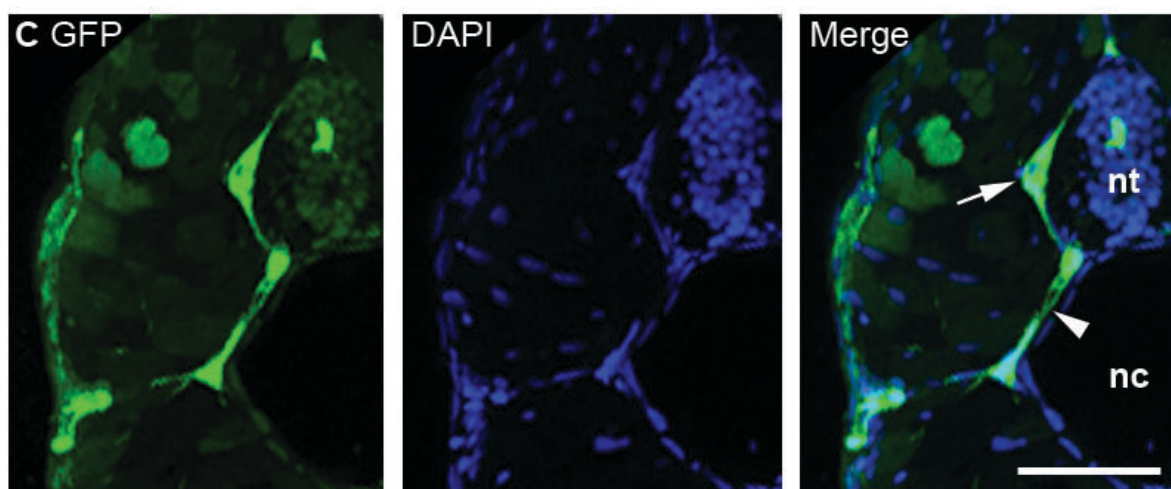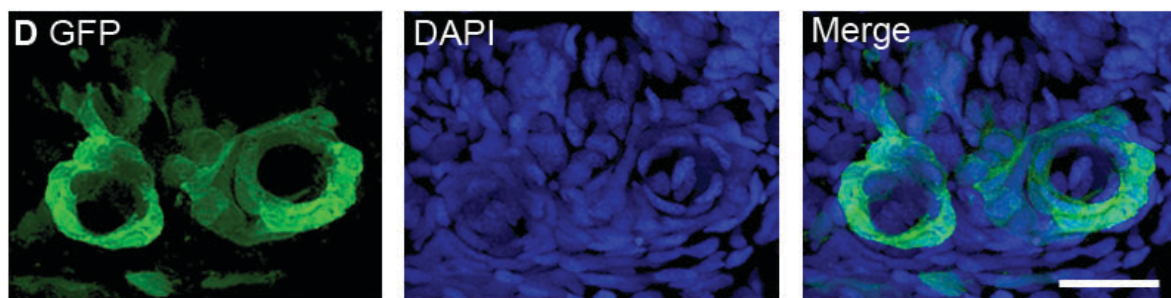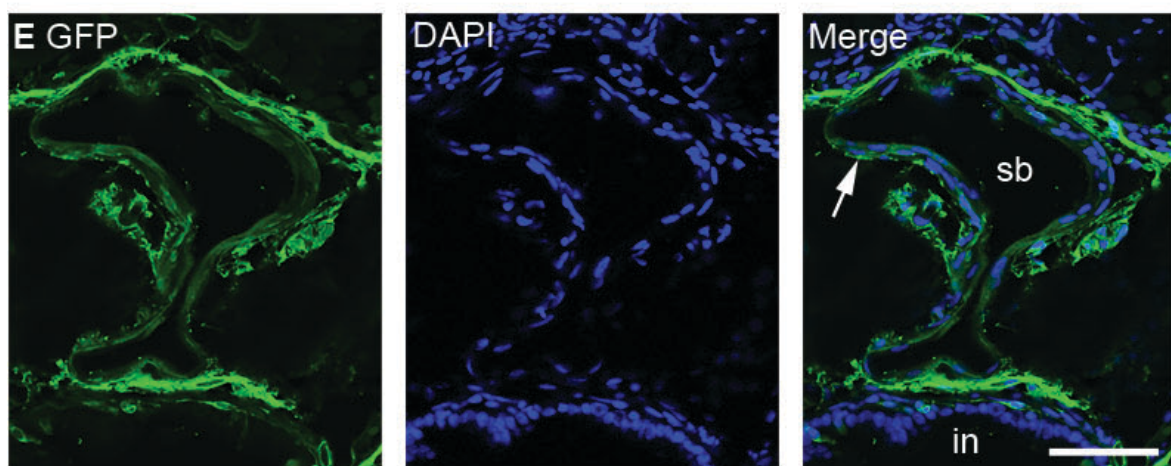

Supplement: NIHMS287381-supplement-13.pdf [file NIHMS287381-supplement-13.pdf]

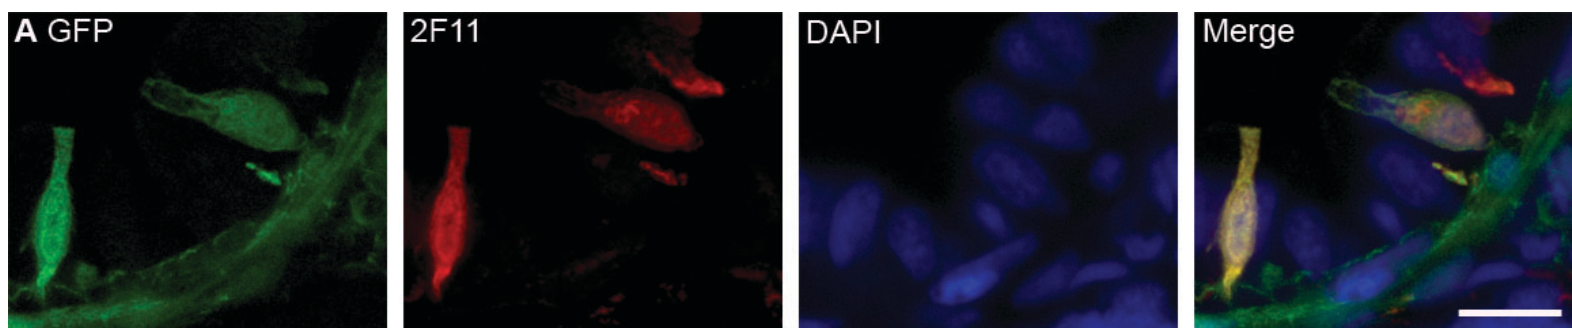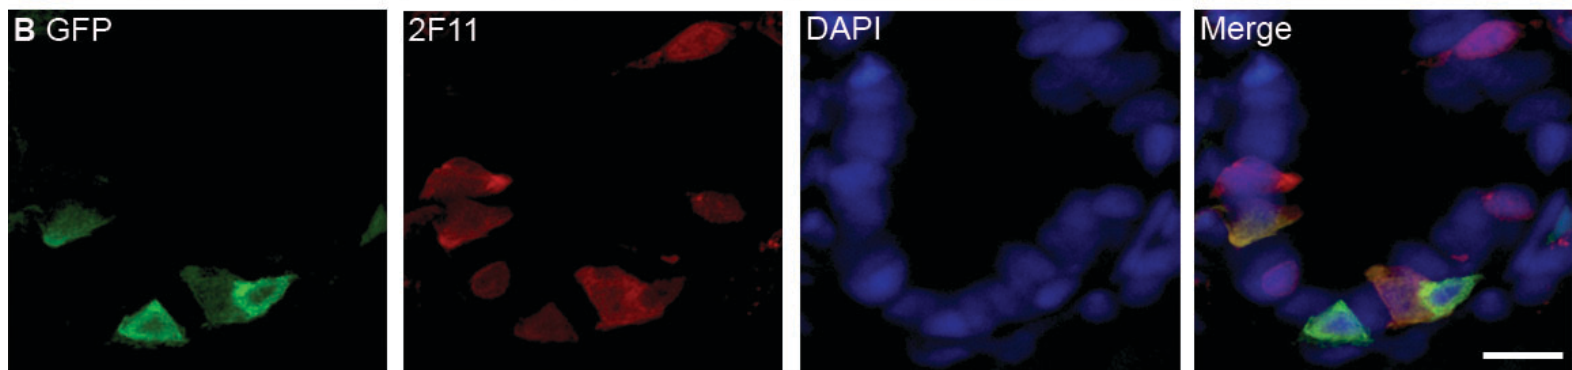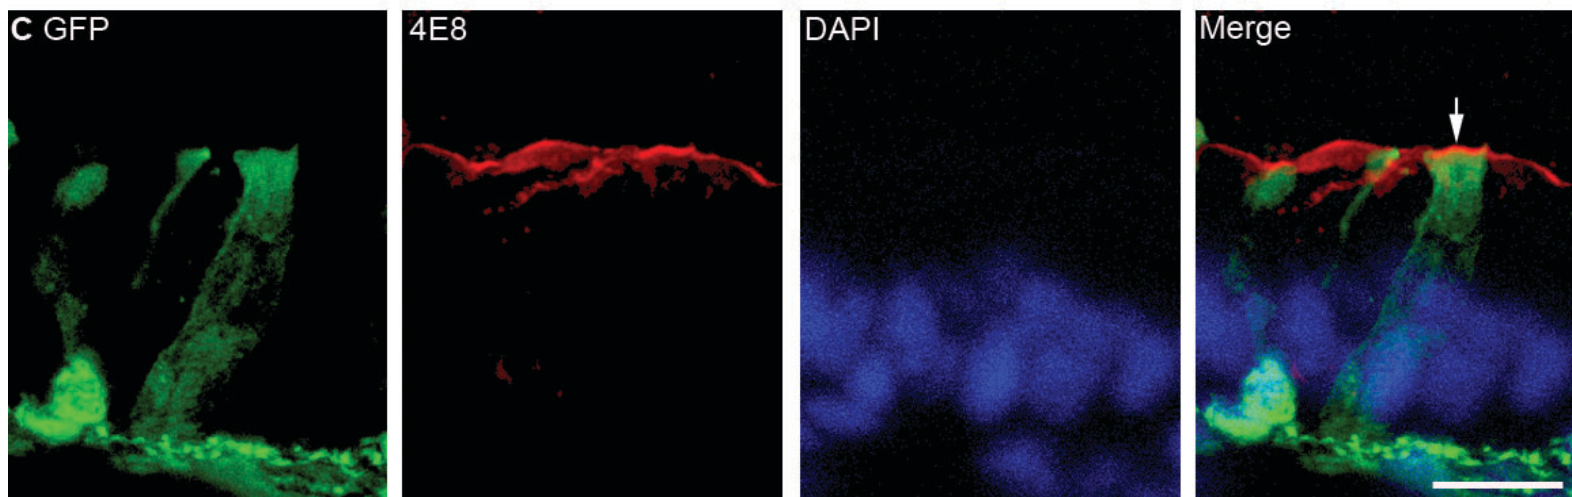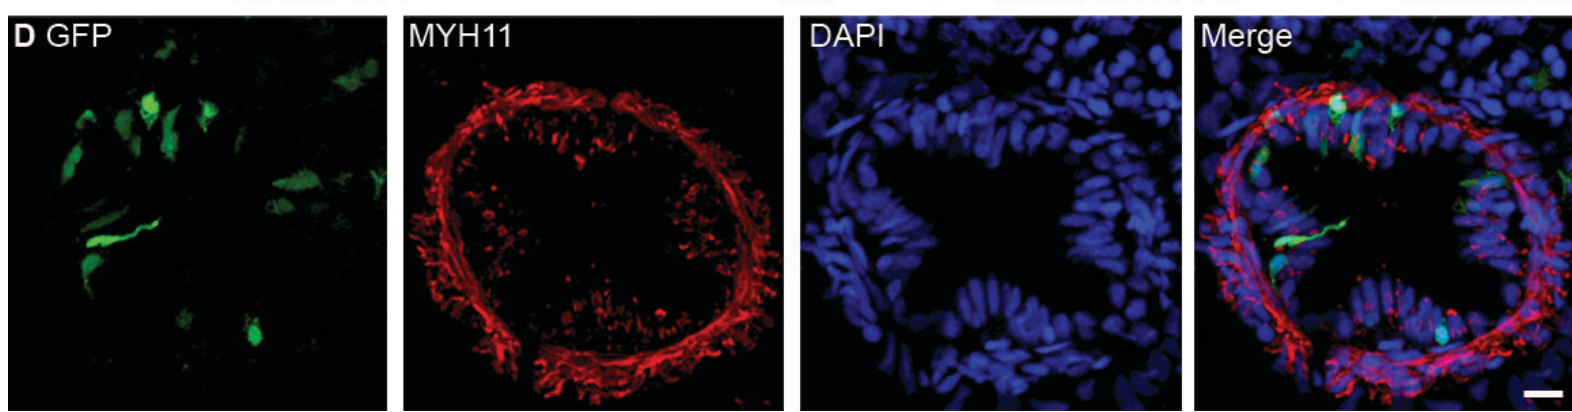

Supplement: NIHMS287381-supplement-14.pdf [file NIHMS287381-supplement-14.pdf]

**Figure S8**

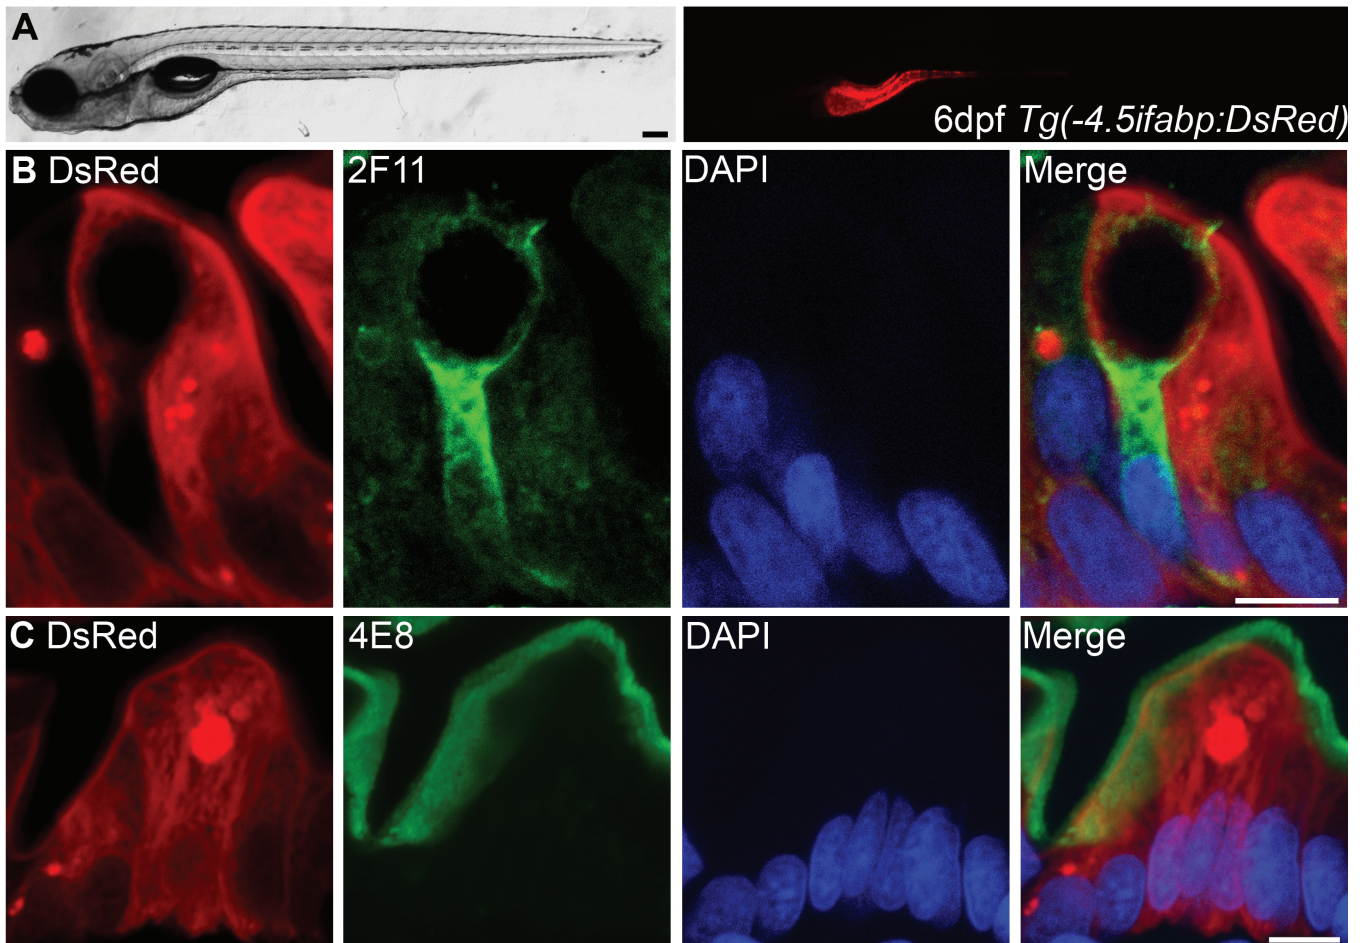

Supplement: NIHMS287381-supplement-New_Fig_S8.pdf [file NIHMS287381-supplement-New_Fig_S8.pdf]

Figure S9

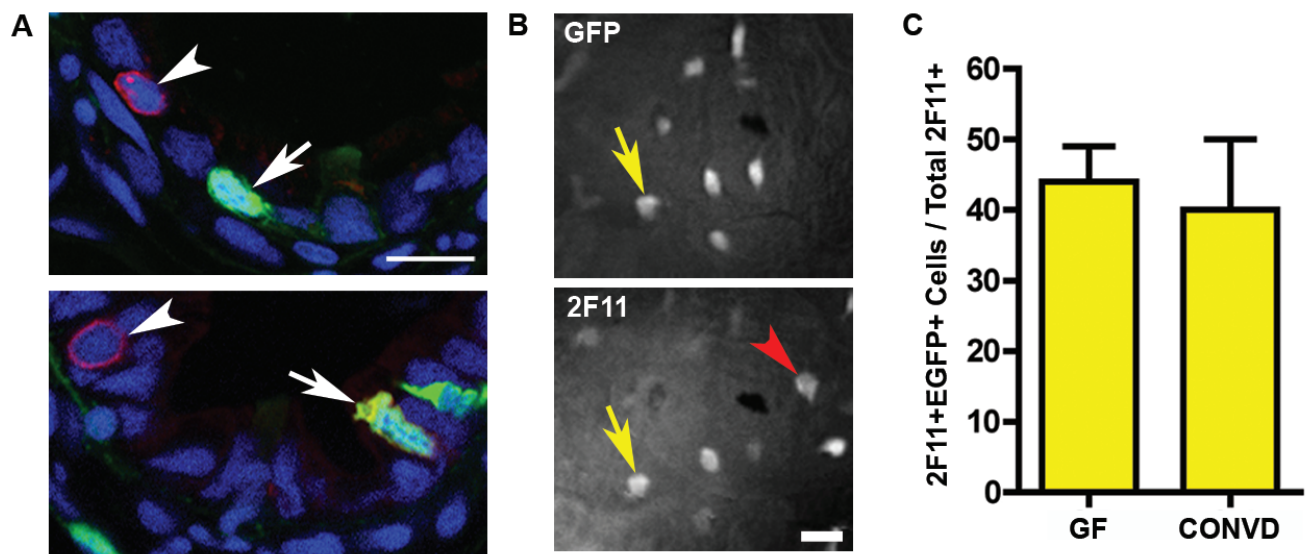

Supplement: NIHMS287381-supplement-New_Fig_S9.pdf [file NIHMS287381-supplement-New_Fig_S9.pdf]
